# Supplementary material for: Comparative efficacy and acceptability of psychotherapies for post-traumatic stress disorder in children and adolescents: a systematic review and network meta-analysis
Source: HighWire-hosted journal article supplement (doi:10.1136/ebmental-2021-300346), 2021-10-01
Supplement: ebmental-2021-300346supp001_data_supplement.pdf [file ebmental-2021-300346supp001_data_supplement.pdf]

---

## Supplementary Online Content

### **Comparative efficacy and acceptability of psychotherapies for post-traumatic stress disorder in children and adolescents: a systematic review and network meta-analysis**

Yajie Xiang, PhD, Andrea Cipriani, PhD, Teng Teng, PhD, Cinzia Del Giovane, PhD, Yuqing Zhang, PhD, John R. Weisz, PhD, Xuemei Li, PhD, Pim Cuijpers, PhD, Xueer Liu, MD, Jürgen Barth, PhD, Yuanliang Jiang, MD, David Cohen, PhD, Li Fan, PhD, Donna Gillies, PhD, Kang Du, MD, Arun V. Ravindran, MD, Xinyu Zhou, PhD, Peng Xie, MD

This supplementary material has been provided by the authors to give readers additional information about their work.

## Contents of Supplementary appendix

|                                                                                                                                               |    |
|-----------------------------------------------------------------------------------------------------------------------------------------------|----|
| Appendix 1. Search strategy and result .....                                                                                                  | 3  |
| Appendix 2. Tables with characteristics of included trials, and description of the psychotherapies and psychological control conditions ..... | 10 |
| Appendix 3. Statistical methods in detail .....                                                                                               | 22 |
| Appendix 4. Published protocol and changes made to the protocol.....                                                                          | 24 |
| Appendix 5. References for included trials.....                                                                                               | 25 |
| Appendix 6. Risk of bias assessment.....                                                                                                      | 29 |
| Appendix 7. Network plot for each outcome .....                                                                                               | 32 |
| Appendix 8. Pairwise meta-analysis for each outcome: numbers, estimates, heterogeneity.....                                                   | 36 |
| Appendix 9. Network meta-analysis for secondary outcomes.....                                                                                 | 45 |
| Appendix 10. Forest plot of network meta-analysis results for secondary outcomes .....                                                        | 47 |
| Appendix 11. Evaluation of heterogeneity and inconsistency .....                                                                              | 49 |
| Appendix 12. Assessment of transitivity .....                                                                                                 | 61 |
| Appendix 13. Comparison-adjusted funnel plot for each outcome from the network meta-analysis .....                                            | 64 |
| Appendix 14. Network meta-regression and sensitivity analyses for each outcome .....                                                          | 69 |
| Appendix 15. Treatment ranking for each outcome .....                                                                                         | 81 |
| Appendix 16. Grading the evidence of the network meta-analysis using CINeMA.....                                                              | 86 |

---

**eAppendix 1. Search strategy and result****Search Strategy and Results****Number of citations by each database and trial register searched\***

---

| <b>Databases and Trial registers</b> | <b>Citations</b> |
|--------------------------------------|------------------|
| <b>Databases:</b>                    |                  |
| Pubmed                               | 1590             |
| CENTRAL                              | 493              |
| Web of Science                       | 1306             |
| Embase                               | 479              |
| CINAHL                               | 396              |
| PsycINFO                             | 2224             |
| ProQuest Dissertations               | 293              |
| PILOTS                               | 1847             |
| <b>Total (databases)</b>             | <b>8628</b>      |
| <b>Trial registers:</b>              |                  |
| USA (ClinicalTrials.gov)             | 223              |
| World Health Organization (ICTRP)    | 58               |
| Australian (ANZCTR)                  | 27               |
| China (ChiCTR)                       | 11               |
| Netherlands Trial Register           | 76               |
| UN (ISRCTN)                          | 50               |
| <b>Total (trial registers)</b>       | <b>445</b>       |

---

## Full search strategy for each database

### PubMed

#1 Search (((((((((((((((posttrauma\*[Title]) OR post-trauma\*[Title]) OR "post trauma\*" [Title]) OR trauma\*[Title]) OR PTSD[Title]) OR "acute stress disorder\*" [Title]) OR peritrauma\*[Title]) OR peritrauma\*[Title]) OR "avoidant disorder\*" [Title]) OR "combat disorder\*" [Title]) OR "war neurosis" [Title]) OR Schreckneurose[Title]) OR "fright neuroses" [Title]) OR "shell shock" [Title]))))

#2 Search (((((((((((((((((((sex\*-abus\*[Title]) OR "sex\* abus\*" [Title]) OR terror\*[Title]) OR war[Title]) OR conflict\*[Title]) OR violen\* [Title]) OR acciden\*[Title]) OR shoot\*[Title]) OR disaster\*[Title]) OR earthquake[Title]) OR tornado[Title]) OR flood[Title]) OR tsunam\*[Title]) OR hurricane\*[Title]) OR fire[Title]) OR maltreat\*[Title]) OR crash\*[Title]) OR death[Title]) OR grief[Title]))))

#3 #1 or #2

#4 Search (((((((((((((((((((((((((((((((((((((((psychother\*[Title/Abstract]) OR psychological[Title/Abstract]) OR "eye movement desensitization and reprocessing" [Title/Abstract]) OR "exposure and response prevention" [Title/Abstract]) OR "exposure with response prevention" [Title/Abstract]) OR EMDR[Title/Abstract]) OR ERP[Title/Abstract]) OR ERASE[Title/Abstract]) OR RAP[Title/Abstract]) OR trauma-focused[Title/Abstract]) OR trauma-specific[Title/Abstract]) OR TF-CBT[Title/Abstract]) OR school-based[Title/Abstract]) OR cognitive-behavior\*[Title/Abstract]) OR behavior\*[Title/Abstract]) OR cogniti\*[Title/Abstract]) OR exposure\*[Title/Abstract]) OR narrative[Title/Abstract]) OR education[Title/Abstract]) OR "family treatment" [Title/Abstract]) OR "family therap\*" [Title/Abstract]) OR interpersonal[Title/Abstract]) OR relaxation[Title/Abstract]) OR bibliotherap\*[Title/Abstract]) OR counsel\*[Title/Abstract]) OR support\*[Title/Abstract]) OR problem-solving[Title/Abstract]) OR "problem solving" [Title/Abstract]) OR psychodynamic[Title/Abstract]) OR treatment\*[Title/Abstract]) OR therap\*[Title/Abstract]))))

#5 Search (((((((((((((((((((((((((((((((((((((((adolesc\*[Title]) OR preadolesc\*[Title]) OR pre-adolesc\*[Title]) OR child\*[Title]) OR boy\*[Title]) OR girl\*[Title]) OR infant\*[Title]) OR juvenil\*[Title]) OR minors[Title]) OR paediatr\*[Title]) OR pediatri\*[Title]) OR pubescen\*[Title]) OR puberty[Title]) OR school\*[Title]) OR student\*[Title]) OR teen\*[Title]) OR young[Title]) OR youth\*[Title]) OR class\*[Title]) OR orphan\*[Title]) OR high-school[Title]) OR "high school" [Title]) OR preschool\*[Title]) OR pre-school\*[Title]))))

#6 Search (((((((random\*[Title/Abstract]) OR allocate\*[Title/Abstract]) OR assign\*[Title/Abstract]) OR "cross over\*" [Title/Abstract]) OR crossover\*[Title/Abstract]) OR controlled[Title/Abstract]))

#7 #3 AND #4 AND #5 AND #6

#8 Applied Filters: Humans

**CENTRAL**

#1 (posttrauma\* or post-trauma\* or "post trauma\*" or trauma\* or PTSD or "acute stress disorder\*" or peritrauma\* or peri-trauma\* or "avoidant disorder\*" or "combat disorder\*" or "war neurosis" or Schreckneurose or "fright neuroses" or "shell shock" or "sex\* abus\*" or terror\* or war or conflict\* or violen\* or acciden\* or shoot\* or disaster\* or earthquake or tornado or flood or tsunami\* or hurricane\* or fire or maltreat\* or crash\* or death or grief):ti

#2 (adolesc\* or preadolesc\* or pre-adolesc\* or child\* or boy\* or girl\* or infant\* or juvenil\* or minors or paediatric\* or pediatri\* or pubescen\* or puberty or school\* or student\* or teen\* or young or youth\* or class\* or orphan\* or high-school or preschool\* or pre-school\*):ti

#3(psychother\* or psychological or "eye movement desensitization and reprocessing" or "exposure and response prevention" or "exposure with response prevention" or EMDR or ERP or ERASE or RAP or trauma-focused or trauma-specific or TF-CBT or school-based or cognitive-behavior\* or behavior\* or cogniti\* or exposure\* or narrative or education\* or "family treatment" or "family therap\*" or interpersonal or relaxation or bibliotherap\* or counsel\* or support\* or problem-solving or "problem solving" or psychodynamic or treatment\* or therap\*):ti

#4 (random\* or allocate\* or assign\* or cross over\* or crossover\* or controlled):ti or (random\* or allocate\* or assign\* or cross over\* or crossover\* or controlled):ab,kw

#5 #1 or #2 or #3 or #4

**Web of science**

#1 TI=(posttrauma\* or post-trauma\* or "post trauma\*" or trauma\* or PTSD or "acute stress disorder\*" or peritrauma\* or peri-trauma\* or "avoidant disorder\*" or "combat disorder\*" or "war neurosis" or Schreckneurose or "fright neuroses" or "shell shock" or sex\*-abus\* or "sex\* abus\*" or terror\* or war or conflict\* or violen\* or acciden\* or shoot\* or disaster\* or earthquake or tornado or flood or tsunami\* or hurricane\* or fire or maltreat\* or crash\* or death or grief)

#2 TI=(sex\*-abus\* or "sex\* abus\*" or terror\* or war or conflict\* or violen\* or acciden\* or shoot\* or disaster\* or earthquake or tornado or flood or tsunami\* or hurricane\* or fire or maltreat\* or crash\* or death or grief)

**#3 #1 or #2**

#4 TI=(adolesc\* or preadolesc\* or pre-adolesc\* or child\* or boy\* or girl\* or infant\* or juvenil\* or minors or paediatric\* or pediatri\* or pubescen\* or puberty or school\* or student\* or teen\* or young or youth\* or class\* or orphan\* or high-school or "high school" or preschool\* or pre-school\*)

#5 TS=(psychother\* or psychological or "eye movement desensitization and reprocessing" or "exposure and response prevention" or "exposure with response prevention" or EMDR or ERP or ERASE or RAP or trauma-focused or trauma-specific or TF-CBT or school-based or cognitive-

behavio\* or behavio\* or cogniti\* or exposure\* or narrative or education\* or "family treatment" or "family therap\*" or interpersonal or relaxation or bibliotherap\* or counsel\* or support\* or problem-solving or "problem solving" or psychodynamic or treatment\* or therap\*)

6 TS=(random\* or allocate\* or assign\* or cross over\* or crossover\* or controlled)

#7 #3 AND #4 AND #5 AND #6

#8 Applied Filters: ( ARTICLE ) AND Web of Science : ( PSYCHIATRY )

### Embase

#1 posttrauma\*:ti OR post-trauma\*:ti OR 'post trauma\*':ti OR trauma\*:ti OR PTSD:ti OR 'acute stress disorder\*':ti OR peritrauma\*:ti OR peri-trauma\*:ti OR 'avoidant disorder\*':ti OR 'combat disorder\*':ti OR 'war neurosis':ti OR Schreckneurose:ti OR 'fright neuroses':ti OR 'shell shock':ti

#2 sex\*-abus\*:ti OR 'sex\* abus\*':ti OR terror\*:ti OR war:ti OR conflict\*:ti OR violen\*:ti OR acciden\*:ti OR shoot\*:ti OR disaster\*:ti OR earthquake:ti OR tornado:ti OR flood:ti OR tsunami\*:ti OR hurricane\*:ti OR fire:ti OR maltreat\*:ti OR crash\*:ti OR death:ti OR grief:ti

#3 #1 OR #2

#4 psychother\*:ab,ti OR psychological:ab,ti OR 'eye movement desensitization and reprocessing':ab,ti OR 'exposure and response prevention':ab,ti OR 'exposure with response prevention':ab,ti OR EMDR:ab,ti OR ERP:ab,ti OR ERASE:ab,ti OR RAP:ab,ti OR trauma-focused:ab,ti OR trauma-specific:ab,ti OR TF-CBT:ab,ti OR school-based:ab,ti OR cognitive-behavior\*:ab,ti OR behavior\*:ab,ti OR cogniti\*:ab,ti OR exposure\*:ab,ti OR narrative:ab,ti OR education\*:ab,ti OR 'family treatment':ab,ti OR 'family therap\*':ab,ti OR interpersonal:ab,ti OR relaxation:ab,ti OR bibliotherap\*:ab,ti OR counsel\*:ab,ti OR support\*:ab,ti OR problem-solving:ab,ti OR 'problem solving':ab,ti OR psychodynamic:ab,ti OR treatment\*:ab,ti OR therap\*:ab,ti

#5 adolesc\*:ab,ti OR preadolesc\*:ab,ti OR pre-adolesc\*:ab,ti OR child\*:ab,ti OR boy\*:ab,ti OR girl\*:ab,ti OR infant\*:ab,ti OR juvenil\*:ab,ti OR minors:ab,ti OR paediatric\*:ab,ti OR pediatri\*:ab,ti OR pubescen\*:ab,ti OR puberty:ab,ti OR school\*:ab,ti OR student\*:ab,ti OR teen\*:ab,ti OR young:ab,ti OR youth\*:ab,ti OR class\*:ab,ti OR orphan\*:ab,ti OR high-school:ab,ti OR high school:ab,ti OR preschool\*:ab,ti OR pre-school\*:ab,ti

#6 random\*:ab,ti or allocate\*:ab,ti or assign\*:ab,ti or 'cross over\*':ab,ti or crossover\*:ab,ti or controlled:ab,ti

#7 #3 AND #4 AND #5 AND #6

#8 Applied Filters: Humans

**CINAHL**

S1 TI (posttrauma\* or post-trauma\* or post trauma\* or trauma\* or PTSD or acute stress disorder\* or peritrauma\* or peri-trauma\* or avoidant disorder\* or combat disorder\* or war neurosis or Schreckneurose or fright neuroses or shell shock or sex\*-abus\* or sex\* abus\* or terror\* or war or conflict\* or violen\* or acciden\* or shoot\* or disaster\* or earthquake or tornado or flood or tsunami\* or hurricane\* or fire or maltreat\* or crash\* or death or grief)

S2 TI (adolesc\* or preadolesc\* or pre-adolesc\* or child\* or boy\* or girl\* or infant\* or juvenil\* or minors or paediatric\* or pediatric\* or pubescen\* or puberty or school\* or student\* or teen\* or young or youth\* or class\* or orphan\* or high-school or high school or preschool\* or pre-school\*)

S3 TI (psychother\* or psychological or (eye movement desensitization and reprocessing) or (exposure and response prevention) or exposure with response prevention or EMDR or ERP or ERASE or RAP or trauma-focused or trauma-specific or TF-CBT or school-based or cognitive-behavior\* or behavior\* or cogniti\* or exposure\* or narrative or family treatment or family therap\* or interpersonal or relaxation or bibliotherap\* or counsel\* or support\* or problem-solving or problem solving or psychodynamic or treatment\* or therap\* or\*education)

S4 TX ("comparative study" or controlled or random\*)

S5 S1 and S2 and S3 and S4

**PsycINFO**

S1 TI (posttrauma\* or post-trauma\* or "post trauma\*" or trauma\* or PTSD or "acute stress disorder\*" or peritrauma\* or peri-trauma\* or "avoidant disorder\*" or "combat disorder\*" or "war neurosis" or Schreckneurose or "fright neuroses" or "shell shock" or sex\*-abus\* or "sex\* abus\*" or terror\* or war or conflict\* or violen\* or acciden\* or shoot\* or disaster\* or earthquake or tornado or flood or tsunami\* or hurricane\* or fire or maltreat\* or crash\* or death or grief)

S2 TI (adolesc\* or preadolesc\* or pre-adolesc\* or child\* or boy\* or girl\* or infant\* or juvenil\* or minors or paediatric\* or pediatric\* or pubescen\* or puberty or school\* or student\* or teen\* or young or youth\* or class\* or orphan\* or high-school or "high school" or preschool\* or pre-school\*)

S3 TI (psychother\* or psychological or "eye movement desensitization and reprocessing" or "exposure and response prevention" or "exposure with response prevention" or EMDR or ERP or ERASE or RAP or trauma-focused or trauma-specific or TF-CBT or school-based or cognitive-behavior\* or behavior\* or cogniti\* or exposure\* or narrative or education\* or "family treatment" or "family therap\*" or interpersonal or relaxation or bibliotherap\* or counsel\* or support\* or problem-solving or "problem solving" or psychodynamic or treatment\* or therap\*) OR AB (psychother\* or psychological or "eye movement desensitization and reprocessing" or "exposure and response prevention" or "exposure with response prevention" or EMDR or ERP or ERASE or RAP or trauma-focused or trauma-specific or TF-CBT or school-based or cognitive-behavior\* or behavior\* or cogniti\* or exposure\* or narrative or

education\* or "family treatment" or "family therap\*" or interpersonal or relaxation or bibliotherap\* or counsel\* or support\* or problem-solving or "problem solving" or psychodynamic or treatment\* or therap\*)

S4 TI (random\* or allocate\* or assign\* or cross over\* or crossover\* or controlled ) OR AB ( random\* or allocate\* or assign\* or cross over\* or crossover\* or controlled )

S5 S1 AND S2 AND S3 AND S4

S6 Applied Filters: Humans

### ProQuest Dissertations

S1 posttrauma\* or post-trauma\* or "post trauma\*" or trauma\* or PTSD or "acute stress disorder\*" or peritrauma\* or peri-trauma\* or "avoidant disorder\*" or "combat disorder\*" or "war neurosis" or Schreckneurose or "fright neuroses" or "shell shock" or "sex\* abus\*" or terror\* or war or conflict\* or violen\* or acciden\* or shoot\* or disaster\* or earthquake or tornado or flood or tsunami\* or hurricane\* or fire or maltreat\* or crash\* or death or grief:ti

S2 adolesc\* or preadolesc\* or pre-adolesc\* or child\* or boy\* or girl\* or infant\* or juvenil\* or minors or paediatric\* or pediatri\* or pubescen\* or puberty or school\* or student\* or teen\* or young or youth\* or class\* or orphan\* or high-school or preschool\* or pre-school\*:ti

S3 psychother\* or psychological or "eye movement desensitization and reprocessing" or "exposure and response prevention" or "exposure with response prevention" or EMDR or ERP or ERASE or RAP or trauma-focused or trauma-specific or TF-CBT or school-based or cognitive-behavior\* or behavior\* or cogniti\* or exposure\* or narrative or education\* or "family treatment" or "family therap\*" or interpersonal or relaxation or bibliotherap\* or counsel\* or support\* or problem-solving or "problem solving" or psychodynamic or treatment\* or therap\*:ti

S4 random\* or allocate\* or assign\* or cross over\* or crossover\* or controlled:ti

S5 S1 and S2 and S3 and S4

### PILOTS

S1 posttrauma\* or post-trauma\* or "post trauma\*" or trauma\* or PTSD or "acute stress disorder\*" or peritrauma\* or peri-trauma\* or "avoidant disorder\*" or "combat disorder\*" or "war neurosis" or Schreckneurose or "fright neuroses" or "shell shock" or "sex\* abus\*" or terror\* or war or conflict\* or violen\* or acciden\* or shoot\* or disaster\* or earthquake or tornado or flood or tsunami\* or hurricane\* or fire or maltreat\* or crash\* or death or grief:ti

S2 adolesc\* or preadolesc\* or pre-adolesc\* or child\* or boy\* or girl\* or infant\* or juvenil\* or minors or paediatric\* or pediatri\* or pubescen\* or puberty or school\* or student\* or teen\* or young or youth\*



---

or class\* or orphan\* or high-school or preschool\* or pre-school\*:ti

S3 psychother\* or psychological or "eye movement desensitization and reprocessing" or "exposure and response prevention" or "exposure with response prevention" or EMDR or ERP or ERASE or RAP or trauma-focused or trauma-specific or TF-CBT or school-based or cognitive-behavo\* or behavio\* or cogniti\* or exposure\* or narrative or education\* or "family treatment" or "family therap\*" or interpersonal or relaxation or bibliotherap\* or counsel\* or support\* or problem-solving or "problem solving" or psychodynamic or treatment\* or therap\*:ti

S4 random\* or allocate\* or assign\* or cross over\* or crossover\* or controlled:ti

S5 S1 and S2 and S3 and S4

## eAppendix 2. Table with characteristics of trials included in the network meta-analysis

| Trial          | Type of trauma <sup>a</sup> | Type of PTSD     | Diagnostic criteria | Treatments (number of sessions) | Sample size | Age range and mean (years) | Proportion of females (%) | Recruiting area (country) | Setting                     | Baseline severity scale; mean baseline severity (SD) | Transforming score of baseline <sup>b</sup> (SD) | Treatment Duration (wk) | Follow-up Duration (mo) |
|----------------|-----------------------------|------------------|---------------------|---------------------------------|-------------|----------------------------|---------------------------|---------------------------|-----------------------------|------------------------------------------------------|--------------------------------------------------|-------------------------|-------------------------|
| Ahmad 2007     | Mixed                       | Full PTSD        | DSM-IV              | EMDR (8) vs WL                  | 17/16       | 6-16 (9.9)                 | 60.6%                     | Sweden                    | Outpatient                  | PTSS-C; 35.5 (21.9)                                  | 14.1 (8.7)                                       | 8                       | NA                      |
| Ahmadi 2018    | War-traumatized             | PTSS             | IES-R-13            | G-TF-CBT (5) vs NT              | 8/8         | 12-18 (14.3)               | 0.0%                      | Afghanistan               | Others                      | CRIES; 32.6 (6.6)                                    | 25.6 (5.2)                                       | 5                       | 3                       |
| Ahrens J 2002  | Mixed                       | Full PTSD        | DSM-IV              | CPT (8) vs WL                   | 19/19       | 15-18 (16.4)               | 0.0%                      | United States             | Others                      | IES; 34.5 (10.3)                                     | 23.4 (7.0)                                       | 8                       | NA                      |
| Berkowitz 2011 | Mixed                       | Subclinical PTSD | DSM-IV              | I-TF-CBT (4) vs ST (4)          | 53/53       | 7-17 (12.0)                | 51.9%                     | United States             | Mental health care settings | TSCC; 52.4 (9.5)                                     | NA                                               | 4                       | 3                       |
| Catani 2009    | War-traumatized and tsunami | Full PTSD        | DSM-IV              | BT (6) vs SM (6)                | 16/15       | 8-14 (11.9)                | 45.2%                     | Sri Lanka                 | Others                      | UCLA-PTSD-RI; 37.3 (14.6)                            | 21.6 (8.5)                                       | 2                       | 6                       |
| Chemtob 2002   | Natural disaster            | Full PTSD        | DSM-IV              | EMDR (3) vs WL                  | 17/15       | 6-12 (8.4)                 | 68.8%                     | United States             | School                      | CRI; 38.0 (16.5)                                     | 24.2 (10.5)                                      | 3                       | 6                       |
| Chen 2014      | Natural disaster            | PTSS             | CRIES-13            | I-nTF-CBT (6) vs ST (6) vs NT   | 16/12/14    | Secondary school (14.5)    | 67.5%                     | China                     | School                      | CRIES-13; 35.7 (11.6)                                | 28.0 (9.1)                                       | 6                       | 3                       |

| Trial               | Type of trauma <sup>a</sup> | Type of PTSD                   | Diagnostic criteria | Treatments (number of sessions) | Sample size | Age range and mean (years) | Proportion of females (%) | Recruiting area (country) | Setting                     | Baseline severity scale; mean baseline severity (SD) | Transforming score of baseline <sup>b</sup> (SD) | Treatment Duration (wk) | Follow-up Duration (mo) |
|---------------------|-----------------------------|--------------------------------|---------------------|---------------------------------|-------------|----------------------------|---------------------------|---------------------------|-----------------------------|------------------------------------------------------|--------------------------------------------------|-------------------------|-------------------------|
| <b>Cohen 1997</b>   | Sexual abuse                | PTSS                           | WBR and CSBI        | I-TF-CBT (12) vs ST (12)        | 28/15       | 5-7 (5.8)                  | 44.2%                     | United States             | Mental health care settings | CSBI; 25.2 (18.8)                                    | 11.3 (8.4)                                       | 12                      | 6,12                    |
| <b>Cohen 2004</b>   | Mixed                       | Full PTSD and subclinical PTSD | DSM-IV              | I-TF-CBT (12) vs ST (12)        | 114/15      | 8-14 (10.8)                | 78.8%                     | United States             | Outpatient                  | K-SADS; 11.9 (1.3)                                   | NA                                               | 12                      | NA                      |
| <b>Cohen 2005</b>   | Sexual abuse                | PTSS                           | NA                  | I-TF-CBT (12) vs ST (12)        | 41/41       | 8-15 (11.1)                | 68.3%                     | United States             | Outpatient                  | TSCC; 10.7 (5.5)                                     | NA                                               | 12                      | 12                      |
| <b>Cohen 2011</b>   | Mixed                       | Full PTSD and subclinical PTSD | K-SADS              | I-TF-CBT (8) vs ST (8)          | 64/60       | 7-14 (9.6)                 | 50.8%                     | United States             | Community                   | K-SADS; 10.5 (2.7)                                   | NA                                               | 8                       | NA                      |
| <b>de Roos 2017</b> | Mixed                       | Full PTSD and subclinical PTSD | DSM-IV              | EMDR (6) vs I-TF-CBT (6) vs WL  | 43/42/18    | 8-18 (13.1)                | 57.3%                     | Netherlands               | Outpatient                  | CPTCI; 47.1 (14.3)                                   | 24.0 (7.3)                                       | 6                       | 12                      |

| Trial                   | Type of trauma <sup>a</sup>  | Type of PTSD                   | Diagnostic criteria | Treatments (number of sessions)       | Sample size | Age range and mean (years) | Proportion of females (%) | Recruiting area (country) | Setting                     | Baseline severity scale; mean baseline severity (SD) | Transforming score of baseline <sup>b</sup> (SD) | Treatment Duration (wk) | Follow-up Duration (mo) |
|-------------------------|------------------------------|--------------------------------|---------------------|---------------------------------------|-------------|----------------------------|---------------------------|---------------------------|-----------------------------|------------------------------------------------------|--------------------------------------------------|-------------------------|-------------------------|
| <b>Deblinger E 1996</b> | Sexual abuse                 | Full PTSD and subclinical PTSD | DSM-III-R           | I-TF-CBT (12) vs P-TF-CBT (12) vs TAU | 50/25/25    | 7-13 (9.8)                 | 83.0%                     | United States             | Mental health care settings | K-SADS; 9.8 (3.0)                                    | NA                                               | 12                      | 3,6,12,24               |
| <b>Deblinger E 2011</b> | Sexual abuse                 | Subclinical PTSD               | DSM-IV-TR           | I-TF-CBT (8) vs I-nTF-CBT (8)         | 52/52       | 4-11 (7.7)                 | 61.0%                     | United States             | Mental health care settings | K-SADS; NA                                           | NA                                               | 8                       | NA                      |
| <b>Diehle J 2015</b>    | Mixed                        | Full PTSD and subclinical PTSD | DSM-IV-TR           | I-TF-CBT (8) vs EMDR (8)              | 23/25       | 8-18 (12.9)                | 37.5%                     | The Netherlands           | Outpatient                  | CAPS-CA; 43.4 (17.4)                                 | 16.3 (6.5)                                       | 8                       | NA                      |
| <b>Dorsey 2020</b>      | Death of one or both parents | PTSS                           | NA                  | G-TF-CBT (15-16) vs TAU               | 320/320     | 7-13 (10.6)                | 50.0%                     | Kenya and Tanzania        | Community                   | CPSS; 23.6 (6.6)                                     | 23.6 (6.6)                                       | 12                      | 12                      |
| <b>Foa EB 2013</b>      | Sexual abuse                 | Full PTSD                      | DSM-IV              | BT (14) vs ST (14)                    | 31/30       | 13-18 (15.3)               | 100.0%                    | United States             | Mental health care settings | CPSS; 30.0 (8.1)                                     | 30.0 (8.1)                                       | 14                      | 3,6,12                  |

| Trial                         | Type of trauma <sup>a</sup> | Type of PTSD                   | Diagnostic criteria | Treatments (number of sessions)  | Sample size | Age range and mean (years) | Proportion of females (%) | Recruiting area (country) | Setting        | Baseline severity scale; mean baseline severity (SD) | Transforming score of baseline <sup>b</sup> (SD) | Treatment Duration (wk) | Follow-up Duration (mo) |
|-------------------------------|-----------------------------|--------------------------------|---------------------|----------------------------------|-------------|----------------------------|---------------------------|---------------------------|----------------|------------------------------------------------------|--------------------------------------------------|-------------------------|-------------------------|
| <b>Ford JD 2012</b>           | Mixed                       | Full PTSD and subclinical PTSD | CAPS-CA             | I-nTF-CBT (12) vs ST (12)        | 33/26       | 13-17 (14.7)               | 100.0%                    | United States             | Medical center | CAPS-CA; 53.9 (17.8)                                 | 20.2 (6.7)                                       | 16                      | NA                      |
| <b>Gilboa-Schechtman 2010</b> | Mixed                       | Full PTSD                      | DSM-IV              | BT (12-15) vs DYN (15-18)        | 19/19       | 12-18 (14.1)               | 36.8%                     | Israel                    | Medical center | CPSS; 27.1 (11.0)                                    | 27.1 (11.0)                                      | 12-18                   | 6,17                    |
| <b>Goldbeck 2016</b>          | Mixed                       | PTSS                           | DSM-IV              | I-TF-CBT (12) vs WL              | 76/83       | 7-17 (13.0)                | 71.7%                     | Germany                   | Outpatient     | UCLA-PTSD-RI; 36.4 (10.3)                            | 23.2 (6.6)                                       | 12                      | 4                       |
| <b>Gordon 2008</b>            | War-traumatized             | Full PTSD                      | DSM-IV              | G-nTF-CBT (12) vs WL             | 41/41       | 14-18 (16.3)               | 75.6%                     | Yugoslavia                | School         | HTQ; 2.5 (0.3)                                       | 42.5 (5.1)                                       | 6                       | 3                       |
| <b>Jaberghaderi 2004</b>      | Sexual abuse                | PTSS                           | DSM-IV              | I-TF-CBT (11.6) vs EMDR (6.1)    | 9/9         | 12-13 (12.5)               | 100.0%                    | Iran                      | Medical center | CROPS; 32.4 (6.4)                                    | 31.8 (6.3)                                       | NA                      | NA                      |
| <b>Jaberghaderi 2019</b>      | Violence                    | PTSS                           | PROPS and CROPS     | I-TF-CBT (12) vs EMDR (12) vs NT | 40/40/59    | 8-12 (NA)                  | 49.6%                     | Iran                      | School         | CROPS; 22.0 (10.1)                                   | 21.6 (9.9)                                       | 4-12                    | NA                      |

| Trial                          | Type of trauma <sup>a</sup> | Type of PTSD                   | Diagnostic criteria | Treatments (number of sessions) | Sample size | Age range and mean (years) | Proportion of females (%) | Recruiting area (country) | Setting                                | Baseline severity scale; mean baseline severity (SD) | Transforming score of baseline <sup>b</sup> (SD) | Treatment Duration (wk) | Follow-up Duration (mo) |
|--------------------------------|-----------------------------|--------------------------------|---------------------|---------------------------------|-------------|----------------------------|---------------------------|---------------------------|----------------------------------------|------------------------------------------------------|--------------------------------------------------|-------------------------|-------------------------|
| <b>Jaycox 2010</b>             | Natural disaster            | PTSS                           | DSM-IV              | I-TF-CBT (12) vs G-TF-CBT (13)  | 60/58       | Grades 4-8 (11.6)          | 55.9%                     | United States             | School and mental health care settings | CPSS; 22.3 (8.0)                                     | 22.3 (8.0)                                       | 12                      | 5,10                    |
| <b>Jensen TK 2014/Aas 2019</b> | Mixed                       | Full PTSD and subclinical PTSD | DSM-IV              | I-TF-CBT (12-15) vs TAU         | 79/77       | 10-18 (15.1)               | 79.5%                     | Norway                    | Outpatient                             | CPSS; 26.8 (8.0)                                     | 26.8 (8.0)                                       | 12                      | NA                      |
| <b>Kameoka 2020</b>            | Mixed                       | Full PTSD                      | DSM-IV              | I-IF-CBT (12) vs WL             | 14/16       | 6-18 (13.9)                | 73.3%                     | Japan                     | Community                              | K-SADS; 12.1 (2.8)                                   | NA                                               | 12                      | 1                       |
| <b>Kazak 2004</b>              | Disease                     | PTSS                           | NA                  | FT (4) vs WL                    | 76/74       | 11-19 (14.6)               | 52.0%                     | United States             | Medical center                         | UCLA-PTSD-RI; 13.4 (11.9)                            | 8.5 (7.6)                                        | 16                      | 5                       |
| <b>Kemp 2010</b>               | Traffic accidents           | Subclinical PTSD               | DSM-IV              | EMDR (4) vs WL                  | 13/14       | 6-12 (8.9)                 | 55.6%                     | Australia                 | Mental health clinic                   | IES; 30.5 (20.8)                                     | 20.8 (14.1)                                      | 6                       | 3,12                    |
| <b>King 2000</b>               | Sexual abuse                | Full PTSD and subclinical PTSD | DSM-IV              | I-TF-CBT (20) vs WL             | 24/12       | 5-17 (11.4)                | 69.4%                     | Australia                 | Medical center                         | ADIS; 13.2 (2.2)                                     | NA                                               | 20-24                   | 3                       |

| Trial                          | Type of trauma <sup>a</sup> | Type of PTSD                   | Diagnostic criteria | Treatments (number of sessions) | Sample size | Age range and mean (years) | Proportion of females (%) | Recruiting area (country) | Setting                         | Baseline severity scale; mean baseline severity (SD) | Transforming score of baseline <sup>b</sup> (SD) | Treatment Duration (wk) | Follow-up Duration (mo) |
|--------------------------------|-----------------------------|--------------------------------|---------------------|---------------------------------|-------------|----------------------------|---------------------------|---------------------------|---------------------------------|------------------------------------------------------|--------------------------------------------------|-------------------------|-------------------------|
| <b>Langley AK 2015</b>         | Mixed                       | PTSS                           | DSM-IV              | G-TF-CBT (12-13) vs WL          | 36/38       | Grades 1-5 (7.7)           | 50.0%                     | United States             | School                          | UCLA-PTSD-RI; 33.8 (14.3)                            | 21.6 (9.1)                                       | 12                      | 3                       |
| <b>Mahmoudi-Gharaei J 2009</b> | Natural disaster            | Subclinical PTSD               | DSM-IV              | G-TF-CBT (4) vs NT              | 36/49       | 11-18 (14.6)               | 74.1%                     | Iran                      | Outpatient                      | PSS; 24.4 (9.3)                                      | 24.4 (9.3)                                       | 4                       | NA                      |
| <b>Meentken 2020</b>           | Mixed                       | Subclinical PTSD               | DSM-IV              | EMDR (3.5) vs TAU               | 37/37       | 4-15 (9.6)                 | 33.8%                     | Netherlands               | Medical center                  | CRTI; 44.7 (8.7)                                     | 16.51 (6.5)                                      | NA                      | 2.3                     |
| <b>Meiser-Stedman 2017</b>     | Mixed                       | Full PTSD                      | DSM-IV              | CT (10) vs WL                   | 14/15       | 8-17 (13.3)                | 72.4%                     | United Kingdom            | Mental health care settings     | CPSS; 30.6 (9.8)                                     | 30.6 (9.8)                                       | 10                      | 12                      |
| <b>Murray LK 2015</b>          | Mixed                       | PTSS                           | PTSD-RI             | I-TF-CBT (10-16) vs TAU         | 131/126     | 5-18 (13.7)                | 49.8%                     | Zambia                    | Medical center, school and home | UCLA-PTSD RI; 1.8 (0.9)                              | 23.2 (12.0)                                      | 21                      | NA                      |
| <b>Najavits 2006</b>           | Mixed                       | Full PTSD                      | DSM-IV              | I-nTF-CBT (25) vs TAU           | 18/15       | Adolescent girls (16.1)    | 100.0%                    | United States             | Outpatient                      | TSCC; 2.5 (2.3)                                      | NA                                               | 12                      | 3                       |
| <b>Nixon RD 2011</b>           | Mixed                       | Full PTSD and subclinical PTSD | CAPS-CA             | I-TF-CBT (9) vs CT (9)          | 17/16       | 7-17 (10.8)                | 36.4%                     | Australia                 | Mental health care settings     | CPSS; 23.7 (8.2)                                     | 23.7 (8.2)                                       | 9                       | 6                       |

| Trial                       | Type of trauma <sup>a</sup> | Type of PTSD                   | Diagnostic criteria | Treatments (number of sessions) | Sample size | Age range and mean (years) | Proportion of females (%) | Recruiting area (country) | Setting                     | Baseline severity scale; mean baseline severity (SD) | Transforming score of baseline <sup>b</sup> (SD) | Treatment Duration (wk) | Follow-up Duration (mo) |
|-----------------------------|-----------------------------|--------------------------------|---------------------|---------------------------------|-------------|----------------------------|---------------------------|---------------------------|-----------------------------|------------------------------------------------------|--------------------------------------------------|-------------------------|-------------------------|
| <b>Ooi 2016</b>             | War-traumatized             | Full PTSD                      | DSM-IV              | G-TF-CBT (8) vs WL              | 45/37       | 10–17 (12.6)               | 35.4%                     | Australia                 | School                      | CRIES; 20.7 (11.4)                                   | 16.3 (8.9)                                       | 8                       | 3                       |
| <b>Peltonen 2019</b>        | War-traumatized             | Subclinical PTSD               | CRIES               | BT (7-10) vs TAU                | 29/21       | 9-17 (13.2)                | 42.0%                     | Finland                   | Medical center              | CRIES; 37.2 (13.5)                                   | 29.2 (10.6)                                      | 10                      | 3                       |
| <b>Pfeiffer 2018</b>        | Mixed                       | PTSS                           | DSM-V               | G-TF-CBT (6) vs TAU             | 47/49       | 13-18 (16.9)               | 7.3%                      | Germany                   | Mental health care settings | CATS; 30.8 (8.6)                                     | 26.2 (7.3)                                       | 6                       | 2                       |
| <b>Pityaratstian N 2014</b> | Natural disaster            | Full PTSD                      | DSM-IV-TR           | G-TF-CBT (3) vs WL              | 18/18       | 10-15 (12.3)               | 72.2%                     | Thailand                  | School                      | UCLA-PTSD RI; 34.4 (13.2)                            | 21.9 (8.4)                                       | NA                      | 1                       |
| <b>Rosner R 2019</b>        | Sexual abuse                | Full PTSD and subclinical PTSD | DSM-IV-TR           | CPT (30-36) vs WL               | 19/21       | 14-17 (16.0)               | 82.5%                     | Germany                   | Outpatient                  | UCLA-PTSD RI; 40.5 (12.6)                            | 30.4 (9.5)                                       | 16-20                   | 3                       |
| <b>Rossouw 2018</b>         | Interpersonal trauma        | Full PTSD                      | DSM-IV              | BT (7-14) vs ST                 | 31/32       | 13-18 (15.4)               | 87.3%                     | South Africa              | School                      | CPSS; 34.7 (5.4)                                     | 34.7 (5.4)                                       | 7-14                    | 6                       |
| <b>Ruf 2010</b>             | Mixed                       | Full PTSD                      | DSM-IV              | BT (8) vs WL                    | 13/13       | 7-16 (11.5)                | 46.2%                     | Germany                   | Outpatient                  | UCLA-PTSD-RI; 40.8 (10.7)                            | 26.0 (6.8)                                       | 8                       | 6,12                    |



| Trial                    | Type of trauma <sup>a</sup>   | Type of PTSD                         | Diagnostic criteria | Treatments (number of sessions) | Sample size | Age range and mean (years) | Proportion of females (%) | Recruiting area (country) | Setting        | Baseline severity scale; mean baseline severity (SD) | Transforming score of baseline <sup>b</sup> (SD) | Treatment Duration (wk) | Follow-up Duration (mo) |
|--------------------------|-------------------------------|--------------------------------------|---------------------|---------------------------------|-------------|----------------------------|---------------------------|---------------------------|----------------|------------------------------------------------------|--------------------------------------------------|-------------------------|-------------------------|
| <b>Salloum A 2008</b>    | Natural disaster and violence | PTSS                                 | DSM-IV              | I-TF-CBT (10) vs G-TF-CBT (10)  | 28/28       | 7-12 (NA)                  | 37.5%                     | United States             | School         | UCLA-PTSD-RI; 43.2 (11.4)                            | 32.4 (8.5)                                       | 10                      | 0.75                    |
| <b>Salloum A 2012</b>    | Mixed                         | PTSS                                 | DSM-IV              | G-TF-CBT (11) vs G-TF-CBT (11)  | 39/33       | 6-12 (9.6)                 | 43.1%                     | United States             | School         | UCLA-PTSD-RI; 45.0 (12.1)                            | 28.7 (7.7)                                       | 10                      | 3,12                    |
| <b>Santiago 2018</b>     | Mixed                         | PTSS                                 | DSM-IV              | G-TF-CBT (10) vs WL             | 25/27       | Grades 1-5 (7.8)           | 36.5%                     | United States             | School         | UCLA-PTSD-RI; 34.7 (11.4)                            | 22.1 (7.3)                                       | 10                      | 6                       |
| <b>Schauer 2008</b>      | Mixed                         | Full PTSD                            | DSM-IV              | BT (6) vs SM (6)                | 25/22       | 11-15 (13.1)               | 61.7%                     | Sri Lanka                 | School         | CAPS-CA; 66.9 (18.9)                                 | 25.1 (7.1)                                       | 4                       | 5,13                    |
| <b>Scheeringa 2011</b>   | Mixed                         | Full PTSD, subclinical PTSD and PTSS | DSM-IV              | I-TF-CBT (12) vs WL             | 40/24       | 3-6 (5.3)                  | 65.6%                     | United States             | Medical center | PAPA; 7.8 (2.7)                                      | NA                                               | 12                      | 6                       |
| <b>Schottelkorb 2012</b> | War-traumatized               | Full PTSD and subclinical PTSD       | DSM-IV              | PT (12-20) vs I-TF-CBT (12-20)  | 14/17       | 6-13 (9.2)                 | 54.8%                     | United States             | School         | UCLA-PTSD-RI; 21.4 (10.8)                            | 13.7 (6.9)                                       | 12                      | NA                      |

| Trial                            | Type of trauma <sup>a</sup> | Type of PTSD | Diagnostic criteria | Treatments (number of sessions) | Sample size | Age range and mean (years) | Proportion of females (%) | Recruiting area (country) | Setting                     | Baseline severity scale; mean baseline severity (SD) | Transforming score of baseline <sup>b</sup> (SD) | Treatment Duration (wk) | Follow-up Duration (mo) |
|----------------------------------|-----------------------------|--------------|---------------------|---------------------------------|-------------|----------------------------|---------------------------|---------------------------|-----------------------------|------------------------------------------------------|--------------------------------------------------|-------------------------|-------------------------|
| <b>Shechtman 2010</b>            | Mixed                       | PTSS         | DSM-IV              | ST (10) vs WL                   | 98/66       | 9-14 (NA)                  | 68.3%                     | Israel                    | School                      | CPTS-RI; 1.9 (0.7)                                   | 24.6 (8.8)                                       | 10                      | NA                      |
| <b>Shein-Szydlo 2016</b>         | Mixed                       | PTSS         | CPTS-RI             | I-TF-CBT (12) vs WL             | 51/49       | 12-18 (14.9)               | 64.0%                     | Mexico                    | Mental health care settings | CPSS; 27.3 (9.2)                                     | 27.3 (9.2)                                       | 12                      | 3                       |
| <b>Smith P 2007</b>              | Mixed                       | Full PTSD    | DSM-IV              | I-TF-CBT (10) vs WL             | 12/12       | 8-18 (13.9)                | 50.0%                     | United Kingdom            | Medical center              | CPSS; 28.2 (9.5)                                     | 28.2 (9.5)                                       | 10                      | 6                       |
| <b>Stein 2003</b>                | Violence                    | PTSS         | CPSS                | G-TF-CBT (10) vs WL             | 61/65       | Grade 6 (11.0)             | 56.3%                     | United States             | School                      | CPSS; 24.0 (7.0)                                     | 24.0 (7.0)                                       | 10                      | 3,6                     |
| <b>Tol 2008</b>                  | War-traumatized             | PTSS         | CPSS                | G-TF-CBT (15) vs WL             | 182/21      | 7-15 (9.9)                 | 48.6%                     | Indonesia                 | School                      | CPSS; 21.7 (8.6)                                     | 21.7 (8.6)                                       | 5                       | 6                       |
| <b>Tol 2014</b>                  | War-traumatized             | PTSS         | CPSS                | G-TF-CBT (15) vs WL             | 153/76      | 8-17 (12.3)                | 48.0%                     | Burundi                   | School                      | CPSS; 16.0 (8.4)                                     | 16.0 (8.4)                                       | 5                       | 3                       |
| <b>PYCES (unpublished trial)</b> | Mixed                       | Full PTSD    | DSM-V               | I-TF-CBT (12) vs TAU            | 18/19       | 3-8 (6.2)                  | 51.4%                     | United Kingdom            | Outpatient                  | PEDS; 51.6 (9.1)                                     | 28.9 (5.8)                                       | 12                      | 3                       |

<sup>a</sup> For the type of trauma, mixed means more than three types of trauma. <sup>b</sup> The method for transforming other PTSD scales to CPSS.<sup>23</sup> PTSD= Post-traumatic stress disorder. DSM=Diagnostic and Statistical Manual of Mental Disorders. EMDR= Eye movement desensitization and reprocessing. WL= Waitlist. PTSS-C= Posttraumatic stress symptom scale for children. NA= Not available. PTSS= post-traumatic stress symptoms. IES= Impact of Events Scale. G-TF-CBT= Group trauma-focused cognitive behavioral therapy. NT= No treatment. CRIES= Children's Revised Impact of Events Scale. CPT= Cognitive processing therapy. I-TF-CBT= Individual trauma-focused cognitive behavioral

---

therapy. TSCC= Trauma Symptom Checklist for Children. BT= Behavioral therapy. SM= Stress management. UCLA-PTSD Reaction Index = UCLA Post-Traumatic Stress Disorder Reaction Index. CRI= Child Reaction Index. CRIES= Children's Revised Impact of Events Scale. I-nTF-CBT= Individual non-trauma-focused cognitive behavioral therapy. ST= Supportive therapy. WBR= Weekly Behavior Record. CSBI= Child Sexual Behavior Inventory. K-SADS= Kiddie-Schedule for Affective Disorders and Schizophrenia. TSCC= Trauma Symptom Checklist for Children. CPTCI= Children's Post Traumatic Cognitions Inventory. TAU= Treatment as usual. P-TF-CBT= Parent-only trauma-focused cognitive behavioral therapy. CAPS-CA= Clinician Administered PTSD Scale-Child and Adolescent Version. CPSS= Child PTSD Symptoms Scale. DYN= Psychodynamic therapy. G-nTF-CBT= Group non-trauma-focused cognitive behavioral therapy. HTQ= Harvard Trauma Questionnaire. PROPS= Parent Report of Post-traumatic Symptoms. CROPS= Child Report of Post-traumatic Symptoms. FT = Family therapy. ADIS= Anxiety Disorders Interview Schedule. PSS=Post-traumatic Stress Scale. CRTI= Children's Responses to Trauma Inventory. CT= Cognitive therapy. CATS= Child and Adolescent Trauma Screen. SM= Stress management. PAPA= Preschool Age Psychiatric Assessment. PT= Play therapy. CPTS-RI=Child Post-Traumatic Stress-Reaction Index. PEDS= Pediatric Emotional Distress Scale.

**Table with description of the psychotherapies and psychological control conditions**

| Interventions                                 | Abbreviation         | Description                                                                                                                                                                                                                                                                                                                                                                                                                                   |
|-----------------------------------------------|----------------------|-----------------------------------------------------------------------------------------------------------------------------------------------------------------------------------------------------------------------------------------------------------------------------------------------------------------------------------------------------------------------------------------------------------------------------------------------|
| <b>Psychotherapeutic Intervention:</b>        |                      |                                                                                                                                                                                                                                                                                                                                                                                                                                               |
| Trauma-focused behavioral therapy             | cognitive TF-CBT     | CBT is a combination of cognitive and behavioral techniques. It also involves additional techniques such as relaxation training, affective modulation skills and enhancement of future safety and development. TF-CBT is a CBT programme that involves a trauma focus, which is usually performed through exposure or cognitive processing of thoughts related to the trauma.                                                                 |
| Non-trauma-focused behavioral therapy         | cognitive Non-TF-CBT | Non-TF-CBT is a CBT programme that focuses on teaching skills for the reduction of anxiety. These treatments use procedures that directly target the person's beliefs and behaviors rather than the discussions of specific traumas.                                                                                                                                                                                                          |
| Cognitive therapy                             | CT                   | CT mainly uses cognitive restructuring training, which aims at examining youths' automatic thoughts and core schemas and evaluating the accuracy and affective consequences of their views. They aim to teach youths to engage in 'rational' thinking about themselves, the traumatic incident and the world.                                                                                                                                 |
| Cognitive processing therapy                  | CPT                  | CPT is a manualized therapy, typically comprising twelve 60-90 min sessions once or twice per week with a focus on trauma memories and reducing distress via written exposures and cognitive restructuring around themes of safety, trust, power/control, esteem, and intimacy. Sessions are highly structured and can be divided into three components: education about PTSD and CPT's treatment rationale, exposure, and cognitive therapy. |
| Behavioral therapy                            | BT                   | BT uses some form of behavioral training, especially for exposure-based therapy and narrative therapy, to help youth reduce trauma-related symptoms. BT is based on principles of habituation.                                                                                                                                                                                                                                                |
| Eye movement desensitization and reprocessing | BMDR                 | EMDR aims to help a person reprocess their memories of a traumatic event. The therapy involves bringing distressing trauma-related images, beliefs and bodily sensations to mind.                                                                                                                                                                                                                                                             |
| Psychodynamic therapy                         | DYN                  | Psychodynamic psychotherapy focuses on integrating the traumatic experience into the life experience of the individual as a whole. Childhood issues are often felt to be important.                                                                                                                                                                                                                                                           |

| Interventions              | Abbreviation | Description                                                                                                                                                                                                                                                                                             |
|----------------------------|--------------|---------------------------------------------------------------------------------------------------------------------------------------------------------------------------------------------------------------------------------------------------------------------------------------------------------|
| Family therapy             | FT           | The psychotherapeutic treatment of more than one member of a family simultaneously at the same session, based on the assumption that problems can best be understood and corrected by observing the interaction of family members and identifying methods for improving their interrelationships.       |
| Play therapy               | PT           | PT used techniques to engage participants in recreational activities to help them cope with their problems and fears.                                                                                                                                                                                   |
| Stress management          | SM           | SM mainly includes some form of relaxation or biofeedback.                                                                                                                                                                                                                                              |
| Supportive therapy         | ST           | ST is an unstructured therapy without specific psychological techniques that it helped people to ventilate their experiences and emotions and offering empathy, for example, supportive counselling, attention control, minimal contact, active listening, common factor control, non-specific control. |
| <b>Control conditions:</b> |              |                                                                                                                                                                                                                                                                                                         |
| Treatment as usual         | TAU          | TAU is often described as 'usual care' or 'usual community treatment' in trials, which may include any components of psychotherapy or pharmacotherapy for PTSD. It is not considered to be structured intervention but may have some treatment effects.                                                 |
| Waitlist                   | WL           | WL is a control condition in which the participants receive no active treatment during the study but are informed that they can receive one after the study period is over.                                                                                                                             |
| No treatment               | NT           | NT is a control condition in which the participants receive no active treatment during the study and in which they do not expect to receive such after the study is over.                                                                                                                               |

## eAppendix 3. Statistical methods in detail

### 1. Pairwise Meta-Analyses

The pairwise meta-analyses of direct evidence were carried out using the random-effects model. Analyses were carried out in Stata (version 15.1). The effect size measure for continuous outcomes was the standardized mean difference (SMD, Cohen's *d*) because we expected that the studies used different rating scales of overall PTSD symptomatology.<sup>1</sup> When standard deviations (SD) were not available, we used the standard errors (SEs) if available and converted them SD.<sup>1</sup> If both SEs and SDs were missing, we estimated SDs from confidence intervals, t-values, or p-values as described in Section 6.5.2 of the Cochrane Handbook for Systematic Reviews.<sup>1</sup> Missing continuous outcome data were analysed using the last available follow-up data, and missing dichotomous outcome data were managed according to the intention-to-treat principle.<sup>2</sup> The effect size for dichotomous outcomes was the odds ratio (OR) and its 95% confidence intervals (CIs). Statistical heterogeneity in each pairwise comparison was assessed with the  $I^2$  statistic, p value of the Q-test and between-study variance ( $\tau^2$ ). For studies with multiple intervention groups, we combined each two groups to create a single pairwise comparison.<sup>1</sup>

### 2. Network Meta-Analyses

We conducted the random-effects network meta-analysis (NMA) to estimate the effect sizes by standardized mean differences (SMDs) and odds ratios (ORs) with 95% confidence intervals (CIs) within a frequentist framework. Analyses were carried out in the statistical programming language R (version 3.5.1) using 'netmeta' (version 1.0-1).<sup>3</sup> Waitlist (WL) was selected as the reference 'treatment' and forest plots were created.<sup>4</sup> We did network plots by using Stata (version 15.1). One of the main assumptions under the NMA methodology is the transitivity assumption, patients who fulfilled the inclusion criteria of our review are equally likely to be randomized to any of the intervention that we planned to compare and therefore that the included comparisons did not differ with respect to the distribution of effect modifiers.<sup>5</sup> We assessed the transitivity assumption by investigating the distribution of clinical and methodological effect modifiers across treatment comparisons by using boxplots. We considered the following effect modifiers: publication year, mean age of participants, the percentage of female, sample size and number of treatment session. We assumed the entire network heterogeneity parameter across the various treatment comparisons and using the magnitude of the heterogeneity variance parameter ( $\tau^2$ ) and total  $I^2$  statistic.<sup>1</sup> We employed global, local methods, as well as node-splitting model to evaluate consistency.<sup>6</sup> Global test was based on a random-effects design-by-treatment interaction model using 'netmeta' (version 1.0-1) package in language R (version 3.5.1).<sup>3</sup> We evaluated the local incoherence to test percentages for inconsistent loops by using Stata (version 15.1). We evaluated the incoherence by node-splitting model by using the 'netsplit' function in language R (version 3.5.1).<sup>3</sup> Potential reasons for heterogeneity were explored by meta-regressions with the 'metafor' function (version 2.1-0).<sup>3</sup> These variables of meta-regressions included publication year, mean age, the percentage of female patients, sample size, number of treatment sessions, treatment duration, follow-up duration, mean baseline severity of PTSD, risk of bias, trauma types, diagnosis criteria, source of outcome measure and psychiatric comorbidities. League tables were created to display the effect sizes for efficacy and acceptability between all possible comparisons by using the 'netleague' function. For each outcome, a frequentist analogue of 'Surface under the Cumulative Ranking Curve' (SUCRA) was used to rank treatments based on degree of efficacy and acceptability,

using the 'netrank' function.<sup>7</sup> This provides P-scores which rank cognitive-behavioral therapies on a continuous 0 to 1 scale: a higher P-score indicates greater degree of efficacy and acceptability. Comparison-adjusted funnel plots and Egger's test were performed to detect publication bias in network meta-analysis in Stata (version 15.1).<sup>8</sup>

## References

1. Higgins JPT TJ, Chandler J, Cumpston M, Li T, Page MJ, Welch VA (editors). Cochrane Handbook for Systematic Reviews of Interventions version 6.2 (updated February 2021). *Cochrane*. 2021. Accessed May 19, 2021. <https://training.cochrane.org/handbook/current>
2. Zhang Y, Zhou X, Yang L, et al. Comparative efficacy and acceptability of psychotherapies for post-traumatic stress disorder in children and adolescents: study protocol for a systematic review and network meta-analysis. *BMJ Open*. 2018;8(3):e020198. doi:10.1136/bmjopen-2017-020198
3. Balduzzi S, Rücker G, Schwarzer G. How to perform a meta-analysis with R: a practical tutorial. *Evid Based Ment Health*. 2019;22(4):153-160. doi:10.1136/ebmental-2019-300117
4. Gerger H, Munder T, Gempferli A, et al. Integrating fragmented evidence by network meta-analysis: relative effectiveness of psychological interventions for adults with post-traumatic stress disorder. *Psychol Med*. 2014;44(15):3151-3164. doi:10.1017/S0033291714000853
5. Watt J, Tricco AC, Straus S, Veroniki AA, Naglie G, Drucker AM. Research Techniques Made Simple: Network Meta-Analysis. *J Invest Dermatol*. 2019;139(1):4-12.e1. doi:10.1016/j.jid.2018.10.028
6. Higgins JP, Jackson D, Barrett JK, Lu G, Ades AE, White IR. Consistency and inconsistency in network meta-analysis: concepts and models for multi-arm studies. *Res Synth Methods*. 2012;3(2):98-110. doi:10.1002/jrsm.1044
7. Rücker G, Schwarzer G. Ranking treatments in frequentist network meta-analysis works without resampling methods. *BMC Med Res Methodol*. 2015;15:58. doi:10.1186/s12874-015-0060-8
8. Chaimani A, Higgins JP, Mavridis D, Spyridonos P, Salanti G. Graphical tools for network meta-analysis in STATA. *PLoS One*. 2013;8(10):e76654. doi:10.1371/journal.pone.0076654

#### **eAppendix 4. Published protocol and changes made to the protocol**

The protocol has been registered in PROSPERO (No. CRD42016051786) and published in BMJ Open – available at <https://bmjopen.bmj.com/content/8/3/e020198>.

##### **Here below changes and clarifications to the published protocol:**

1. In order to obtain more comprehensive data, we searched additional international trial registers, including Chinese Clinical Trial Register (ChiCTR), the International Standard Randomized Controlled Trial Number (ISRCTN), and the Netherlands Trial Register.
2. We had planned to assess the efficacy at post-treatment as primary outcome, and efficacy at follow-up, all-cause discontinuation, anxiety symptoms, depressive symptoms and quality of life and functional improvement as secondary outcomes. However, due to the clinical significance of efficacy at follow-up and acceptability, we adjusted efficacy at post-treatment and follow-up and all-cause discontinuation as primary outcomes. In addition, there were not enough available data for network analysis after data extraction; thus, we could not perform the outcome of the quality of life and functional improvement.
3. The Confidence in Network Meta-Analysis (CINeMA) is a new application to assess the credibility of findings from each network meta-analysis, which is a user-friendly web-based platform provides a transparent framework to evaluate evidence from systematic reviews with multiple interventions. CINeMA has been performed in several high quality network meta-analysis. So we used the CINeMA approach to evaluate the credibility of each outcome rather than GRADE framework. From a technical point of view, CINeMA is a single page application which communicates to an R back-end server; in particular, the packages “meta” and “netmeta” are used. The CINeMA approach evaluation was based on the frequency model network meta-analysis. Thus, we have adjusted the Bayesian model into frequency model network meta-analysis for each outcome with random-effects model in R (version 3.5.1) using ‘netmeta’ (version 1.0-1). The meta-regression was performed in R (version 3.5.1) using ‘metafor’ (version 2.1-0).
4. We have adjusted some analyses for sensitivity analyses, subgroup and meta-regressions according to the characteristics of trials. We didn’t perform any subgroup analyses due to the limitation of the number of studies. First, we added meta-regression analyses with (1) publication year; (2) mean age; (3) the percentage of female; (4) sample size; (5) number of treatment sessions; (6) treatment duration; (7) followup duration; (8) mean baseline severity of PTSD; (9) risk of bias; (10) trauma types (acute/single trauma vs. chronic/multiple trauma); (11) diagnosis criteria (youth with a standardized diagnosis vs. with subsyndromal symptoms or PTSS); (12) source of outcome measure (self-rated vs observer rated); (13) with or without psychiatric comorbidities. Second, we added sensitivity analyses of omitting unpublished trials and trials with high risk of bias.



## eAppendix 5. References for included trials

1. Ahmad A, Larsson B, Sundelin-Wahlsten V. EMDR treatment for children with PTSD: results of a randomized controlled trial. *Nordic journal of psychiatry* 2007; **61**: 349-54.
2. Ahmadi SJ, Kajbaf MB, Doost HTN, et al. The efficacy of memory specificity training in improving symptoms of post-traumatic stress disorder in bereaved Afghan adolescents. *Intervention-International Journal of Mental Health Psychosocial Work and Counselling in Areas of Armed Conflict* 2018; **16**: 243-8.
3. Ahrens J, Rexford L. Cognitive Processing Therapy for Incarcerated Adolescents with PTSD. *Journal of Aggression, Maltreatment & Trauma* 2002; **6**: 201-16.
4. Berkowitz SJ, Stover CS, Marans SR. The Child and Family Traumatic Stress Intervention: secondary prevention for youth at risk of developing PTSD. *Journal of child psychology and psychiatry, and allied disciplines* 2011; **52**: 676-85.
5. Catani C, Kohiladevy M, Ruf M, et al. Treating children traumatized by war and Tsunami: a comparison between exposure therapy and meditation-relaxation in North-East Sri Lanka. *BMC Psychiatry* 2009; **9**: 22.
6. Chemtob CM, Nakashima J, Carlson JG. Brief treatment for elementary school children with disaster-related posttraumatic stress disorder: A field study. *Journal of Clinical Psychology* 2002; **58**: 99-112.
7. Chen Y, Shen WW, Gao K, et al. Effectiveness RCT of a CBT intervention for youths who lost parents in the Sichuan, China, earthquake. *Psychiatric services* 2014; **65**: 259-62.
8. Cohen JA, Deblinger E, Mannarino AP, et al. A multisite, randomized controlled trial for children with sexual abuse-related PTSD symptoms. *J Am Acad Child Adolesc Psychiatry* 2004; **43**: 393-402.
9. Cohen JA, Mannarino AP. Interventions for sexually abused children: Initial treatment outcome findings. *Child Maltreatment* 1997; **3**: 17-26.
10. Cohen JA, Mannarino AP, Iyengar S. Community treatment of posttraumatic stress disorder for children exposed to intimate partner violence: a randomized controlled trial. *Archives of pediatrics & adolescent medicine* 2011; **165**: 16-21.
11. Cohen JA, Mannarino AP, Knudsen K. Treating sexually abused children: 1 year follow-up of a randomized controlled trial. *Child Abuse & Neglect* 2005; **29**: 135-45.
12. de Roos C, Oord S, Zijlstra B, et al. Comparison of eye movement desensitization and reprocessing therapy, cognitive behavioral writing therapy, and wait-list in pediatric posttraumatic stress disorder following single-incident trauma: A multicenter randomized clinical trial. *Journal of Child Psychology and Psychiatry* 2017; **58**: 1219-28.
13. Deblinger E, Lippmann J, Steer R. Sexually Abused Children Suffering Posttraumatic Stress Symptoms: Initial Treatment Outcome Findings. *Child Maltreatment* 1996; **1**: 310-21.
14. Deblinger EM, A. P. Cohen, J. A. Runyon, M. K. Steer, R. A. Trauma-focused cognitive behavioral therapy for children: impact of the trauma narrative and treatment length. *Depression and anxiety* 2011; **28**: 67-75.
15. Diehle J, Opmeer BC, Boer F, et al. Trauma-focused cognitive behavioral therapy or eye movement desensitization and reprocessing: what works in children with posttraumatic stress symptoms? A randomized controlled trial. *European child & adolescent psychiatry* 2015; **24**: 227-36.
16. Dorsey S, Lucid L, Martin P, et al. Effectiveness of Task-Shifted Trauma-Focused Cognitive Behavioral Therapy for Children Who Experienced Parental Death and Posttraumatic Stress in Kenya and Tanzania: A Randomized Clinical Trial. *JAMA Psychiatry* 2020.

17. Foa EB, McLean CP, Capaldi S, et al. Prolonged exposure vs supportive counseling for sexual abuse-related PTSD in adolescent girls: A randomized clinical trial. *JAMA* 2013; **310**: 2650-7.
18. Ford JD, Steinberg KL, Hawke J, et al. Randomized trial comparison of emotion regulation and relational psychotherapies for PTSD with girls involved in delinquency. *Journal of clinical child and adolescent psychology : the official journal for the Society of Clinical Child and Adolescent Psychology, American Psychological Association, Division 53* 2012; **41**: 27-37.
19. Gilboa-Schechtman E, Foa EB, Shafraan N, et al. Prolonged exposure versus dynamic therapy for adolescent PTSD: a pilot randomized controlled trial. *J Am Acad Child Adolesc Psychiatry* 2010; **49**: 1034-42.
20. Goldbeck L, Muehe R, Sachser C, et al. Effectiveness of Trauma-Focused Cognitive Behavioral Therapy for Children and Adolescents: A Randomized Controlled Trial in Eight German Mental Health Clinics. *Psychotherapy and psychosomatics* 2016; **85**: 159-70.
21. Gordon JS, Staples JK, Blyta A, et al. Treatment of posttraumatic stress disorder in postwar Kosovar adolescents using mind-body skills groups: A randomized controlled trial. *Journal of Clinical Psychiatry* 2008; **69**: 1469-76.
22. Hitchcock C, Goodall, B., Griffiths, Chadwick, I., Werner-Seidler, A., Dunning, D., Johnson, D., Gillard, J., Panesar, I., Humphrey, A., Watson, P., Mckinnon, A., Smith, P., Meiser-Stedman, R. & Dalgleish, T. (submitted for publication). The acute course and treatment of Posttraumatic Stress Disorder in very young children: Diagnostic prevalence and predictors in hospital-attending children and a randomised controlled proof-of-concept trial of trauma-focused cognitive therapy for 3-8 year olds. [ISRCTN35018680]. 2021.
23. Jaberghaderi N, Greenwald R, Rubin A, et al. A Comparison of CBT and EMDR for Sexually-abused Iranian Girls. *Clinical psychology & psychotherapy* 2004; **11**: 358-68.
24. Jaberghaderi N, Rezaei M, Kolivand M, et al. Effectiveness of Cognitive Behavioral Therapy and Eye Movement Desensitization and Reprocessing in Child Victims of Domestic Violence. *Iranian Journal of Psychiatry* 2019; **14**: 67-75.
25. Jaycox LH, Cohen JA, Mannarino AP, et al. Children's Mental Health Care Following Hurricane Katrina: A Field Trial of Trauma-Focused Psychotherapies. *Journal of Traumatic Stress* 2010; **23**: 223-31.
26. Jensen TK, Holt T, Ormhaug SM, et al. A randomized effectiveness study comparing trauma-focused cognitive behavioral therapy with therapy as usual for youth. *Journal of clinical child and adolescent psychology : the official journal for the Society of Clinical Child and Adolescent Psychology, American Psychological Association, Division 53* 2014; **43**: 356-69.
27. Kameoka S, Tanaka E, Yamamoto S, et al. Effectiveness of trauma-focused cognitive behavioral therapy for Japanese children and adolescents in community settings: a multisite randomized controlled trial. *European Journal of Psychotraumatology* 2020; **11**.
28. Kazak AE, Alderfer MA, Streisand R, et al. Treatment of posttraumatic stress symptoms in adolescent survivors of childhood cancer and their families: a randomized clinical trial. *Journal of family psychology : JFP : journal of the Division of Family Psychology of the American Psychological Association (Division 43)* 2004; **18**: 493-504.
29. Kemp M, Drummond P, McDermott B. A wait-list controlled pilot study of eye movement desensitization and reprocessing (EMDR) for children with post-traumatic stress disorder (PTSD) symptoms from motor vehicle accidents. *Clin Child Psychol Psychiatry* 2010; **15**: 5-25.
30. King NJ, Tonge BJ, Mullen P, et al. Treating sexually abused children with posttraumatic stress

- symptoms: a randomized clinical trial. *J Am Acad Child Adolesc Psychiatry* 2000; **39**: 1347-55.
31. Langley AK, Gonzalez A, Sugar CA, et al. Bounce Back: Effectiveness of an Elementary School-Based Intervention for Multicultural Children Exposed to Traumatic Events. *Journal of Consulting and Clinical Psychology* 2015.
32. Mahmoudi Gharaei J, Mohammadi MR, Yasami MT, et al. The Effects of a Short-term Cognitive Behavioral Group Intervention on Bam Earthquake Related PTSD Symptoms in Adolescents. *Iran J Psychiatry* 2009; **4**: 79-84.
33. Meentken MG, van der Mheen M, van Beynum IM, et al. EMDR for children with medically related subthreshold PTSD: short-term effects on PTSD, blood-injection-injury phobia, depression and sleep. *Eur J Psychotraumatol* 2020; **11**: 1705598.
34. Meiser-Stedman R, Smith P, McKinnon A, et al. Cognitive therapy as an early treatment for post-traumatic stress disorder in children and adolescents: A randomized controlled trial addressing preliminary efficacy and mechanisms of action. *Journal of Child Psychology and Psychiatry* 2017; **58**: 623-33.
35. Murray LK, Skavenski S, Kane JC, et al. Effectiveness of Trauma-Focused Cognitive Behavioral Therapy Among Trauma-Affected Children in Lusaka, Zambia: A Randomized Clinical Trial. *JAMA pediatrics* 2015; **169**: 761-9.
36. Najavits LM, Gallop RJ, Weiss RD. Seeking safety therapy for adolescent girls with PTSD and substance use disorder: a randomized controlled trial. *The journal of behavioral health services & research* 2006; **33**: 453-63.
37. Nixon RD, Sterk J, Pearce A. A randomized trial of cognitive behaviour therapy and cognitive therapy for children with posttraumatic stress disorder following single-incident trauma. *Journal of abnormal child psychology* 2011; **40**: 327-37.
38. Ooi CS, Rooney RM, Roberts C, et al. The efficacy of a group cognitive behavioral therapy for war-affected young migrants living in Australia: A cluster randomized controlled trial. *Frontiers in Psychology* 2016; **7**.
39. Peltonen K, Kangaslampi S. Treating children and adolescents with multiple traumas: a randomized clinical trial of narrative exposure therapy. *European Journal of Psychotraumatology* 2019; **10**.
40. Pfeiffer E, Sachser C, de Haan A, et al. Dysfunctional posttraumatic cognitions as a mediator of symptom reduction in Trauma-Focused Cognitive Behavioral Therapy with children and adolescents: Results of a randomized controlled trial. *Behaviour research and therapy* 2018; **97**: 178-82.
41. Pityaratstian N, Piyasil V, Ketumarn P, et al. Randomized Controlled Trial of Group Cognitive Behavioural Therapy for Post-Traumatic Stress Disorder in Children and Adolescents Exposed to Tsunami in Thailand. *Behavioural and cognitive psychotherapy* 2014; **43**: 549-61.
42. Rosner R, Rimane E, Frick U, et al. Effect of Developmentally Adapted Cognitive Processing Therapy for Youth With Symptoms of Posttraumatic Stress Disorder After Childhood Sexual and Physical Abuse A Randomized Clinical Trial. *Jama Psychiatry* 2019; **76**: 484-91.
43. Rossouw J, Yadin E, Alexander D, et al. Prolonged exposure therapy and supportive counselling for post-traumatic stress disorder in adolescents: task-shifting randomised controlled trial. *British Journal of Psychiatry* 2018; **213**: 587-94.
44. Ruf M, Schauer M, Neuner F, et al. Narrative exposure therapy for 7- to 16-year-olds: a randomized controlled trial with traumatized refugee children. *Journal of traumatic stress* 2010; **23**: 437-45.
45. Salloum A, Overstreet S. Evaluation of individual and group grief and trauma interventions for children post disaster. *Journal of clinical child and adolescent psychology : the official journal for the*

*Society of Clinical Child and Adolescent Psychology, American Psychological Association, Division 53* 2008; **37**: 495-507.

46. Salloum A, Overstreet S. Grief and trauma intervention for children after disaster: exploring coping skills versus trauma narration. *Behaviour research and therapy* 2012; **50**: 169-79.
47. Santiago CD, Raviv T, Ros AM, et al. Implementing the Bounce Back trauma intervention in urban elementary schools: A real-world replication trial. *School psychology quarterly : the official journal of the Division of School Psychology, American Psychological Association* 2018; **33**: 1-9.
48. Schauer E. Trauma treatment for children in war: build-up of an evidence-based large-scale mental health intervention in north-eastern Sri Lanka.: Konstanz: University of Konstanz; 2008.
49. Scheeringa MS, Weems CF, Cohen JA, et al. Trauma-focused cognitive-behavioral therapy for posttraumatic stress disorder in three-through six year-old children: a randomized clinical trial. *Journal of child psychology and psychiatry, and allied disciplines* 2011; **52**: 853-60.
50. Schottelkorb AA, Dumas DM, Garcia R. Treatment for childhood refugee trauma: A randomized, controlled trial. *International Journal of Play Therapy* 2012; **21**: 57-73.
51. Shechtman Z, Mor M. Groups for children and adolescents with trauma-related symptoms: outcomes and processes. *International journal of group psychotherapy* 2010; **60**: 221-44.
52. Shein-Szydlo J, Sukhodolsky DG, Kon DS, et al. A Randomized Controlled Study of Cognitive-Behavioral Therapy for Posttraumatic Stress in Street Children in Mexico City. *Journal of traumatic stress* 2016; **29**: 406-14.
53. Smith P, Yule W, Perrin S, et al. Cognitive-behavioral therapy for PTSD in children and adolescents: a preliminary randomized controlled trial. *J Am Acad Child Adolesc Psychiatry* 2007; **46**: 1051-61.
54. Stein BD, Jaycox LH, Kataoka SH, et al. A Mental Health Intervention for Schoolchildren Exposed to Violence: A Randomized Controlled Trial. *Journal of the American Medical Association* 2003; **290**: 603-11.
55. Tol WA, Komproe IH, Jordans MJ, et al. School-based mental health intervention for children in war-affected Burundi: a cluster randomized trial. *BMC medicine* 2014; **12**: 56.
56. Tol WA, Komproe IH, Susanty D, et al. School-based mental health intervention for children affected by political violence in Indonesia: a cluster randomized trial. *Jama* 2008; **300**: 655-62.

## eAppendix 6. Risk of bias assessment

We classified an overall risk of bias for every study based on the individual risk of bias items. The classification is based on the Revised Cochrane risk-of-bias tool for randomized trials (RoB 2.0) recommendations from the following reference: “Sterne JAC, Savović J, Page MJ, et al. RoB 2: a revised tool for assessing risk of bias in randomised trials. *BMJ*. 2019;366:l4898. doi:10.1136/bmj.l4898.” The details of rating criteria are in the published protocol: Zhang Y, Zhou X, Yang L, et al. Comparative efficacy and acceptability of psychotherapies for post-traumatic stress disorder in children and adolescents: study protocol for a systematic review and network meta-analysis. *BMJ Open*. 2018;8(3):e020198. doi:10.1136/bmjopen-2017-020198.

### The summary of the RoB 2.0 assessment of each study

| No. | Study ID         | Treatments                  | Randomization process | Deviations from intended interventions | Mising outcome data | Measurement of the outcome | Selection of the reported result | Overall Bias  |
|-----|------------------|-----------------------------|-----------------------|----------------------------------------|---------------------|----------------------------|----------------------------------|---------------|
| 1   | Ahmad 2007       | EMDR vs WL                  | Low                   | Low                                    | Low                 | Low                        | Low                              | Low           |
| 2   | Ahmadi 2018      | G-TF-CBT vs NT              | Low                   | Low                                    | Low                 | Low                        | Low                              | Low           |
| 3   | Ahrens J 2002    | CPT vs WL                   | Some concerns         | Some concerns                          | Low                 | Some concerns              | High                             | High          |
| 4   | Berkowitz 2011   | I-TF-CBT vs ST              | Low                   | Low                                    | Low                 | Some concerns              | Low                              | Some concerns |
| 5   | Catani 2009      | BT vs SM                    | Low                   | Low                                    | Low                 | Low                        | Low                              | Low           |
| 6   | Chemtob 2002     | EMDR vs WL                  | Low                   | Low                                    | Low                 | Some concerns              | Low                              | Some concerns |
| 7   | Chen 2014        | I-nTF-CBT vs ST vs NT       | Low                   | Some concerns                          | Some concerns       | Some concerns              | Low                              | Some concerns |
| 8   | Cohen 1997       | I-TF-CBT vs ST              | Low                   | Low                                    | Low                 | Low                        | Low                              | Low           |
| 9   | Cohen 2004       | I-TF-CBT vs ST              | Some concerns         | Low                                    | Some concerns       | Some concerns              | Low                              | Some concerns |
| 10  | Cohen 2005       | I-TF-CBT vs ST              | Low                   | Some concerns                          | Some concerns       | Low                        | Low                              | Some concerns |
| 11  | Cohen 2011       | I-TF-CBT vs ST              | Low                   | Low                                    | Low                 | Low                        | Low                              | Low           |
| 12  | de Roos 2017     | EMDR vs I-TF-CBT vs WL      | Low                   | Low                                    | Low                 | Low                        | Low                              | Low           |
| 13  | Deblinger E 1996 | I-TF-CBT vs P-TF-CBT vs TAU | Some concerns         | High                                   | Some concerns       | Some concerns              | High                             | High          |

| No. | Study ID                | Treatments             | Randomization process | Deviations from intended interventions | Missing outcome data | Measurement of the outcome | Selection of the reported result | Overall Bias  |
|-----|-------------------------|------------------------|-----------------------|----------------------------------------|----------------------|----------------------------|----------------------------------|---------------|
| 14  | Deblinger E 2011        | I-TF-CBT vs I-nTF-CBT  | Low                   | High                                   | Low                  | Low                        | Some concerns                    | High          |
| 15  | Diehle J 2015           | I-TF-CBT vs EMDR       | Low                   | Low                                    | Some concerns        | Low                        | Low                              | Some concerns |
| 16  | Dorsey 2020             | G-TF-CBT vs TAU        | Low                   | Low                                    | Low                  | Low                        | Low                              | Low           |
| 17  | Foa EB 2013             | BT vs ST               | Low                   | Low                                    | Some concerns        | Low                        | Low                              | Some concerns |
| 18  | Ford JD 2012            | I-nTF-CBT vs ST        | Low                   | Some concerns                          | Low                  | Some concerns              | Low                              | Some concerns |
| 19  | Gilboa-Schechtman 2010  | BT vs DYN              | Low                   | Low                                    | Some concerns        | Low                        | Low                              | Some concerns |
| 20  | Goldbeck 2016           | I-TF-CBT vs WL         | Low                   | Low                                    | Some concerns        | Low                        | Low                              | Some concerns |
| 21  | Gordon 2008             | G-nTF-CBT vs WL        | Low                   | Some concerns                          | Low                  | Some concerns              | Some concerns                    | Some concerns |
| 22  | Jaberghaderi 2004       | I-TF-CBT vs EMDR       | Low                   | High                                   | Some concerns        | Low                        | Low                              | High          |
| 23  | Jaberghaderi 2019       | I-TF-CBT vs EMDR vs NT | Low                   | High                                   | Some concerns        | Low                        | Low                              | High          |
| 24  | Jaycox 2010             | I-TF-CBT vs G-TF-CBT   | Low                   | High                                   | Some concerns        | Some concerns              | Low                              | High          |
| 25  | Jensen TK 2014          | I-TF-CBT vs TAU        | Low                   | Some concerns                          | Low                  | Low                        | Low                              | Some concerns |
| 26  | Kameoka 2020            | I-TF-CBT vs WL         | Low                   | Low                                    | Low                  | Low                        | Low                              | Low           |
| 27  | Kazak 2004              | FT vs WL               | Low                   | Low                                    | Some concerns        | Low                        | Low                              | Some concerns |
| 28  | Kemp 2010               | EMDR vs WL             | Low                   | High                                   | Low                  | High                       | Some concerns                    | High          |
| 29  | King 2000               | I-TF-CBT vs WL         | Low                   | Low                                    | Some concerns        | Low                        | Low                              | Some concerns |
| 30  | Langley AK 2015         | G-TF-CBT vs WL         | Low                   | Low                                    | Low                  | Low                        | Low                              | Low           |
| 31  | Mahmoudi-Gharaei J 2009 | G-TF-CBT vs NT         | Low                   | Some concerns                          | Some concerns        | Some concerns              | Low                              | Some concerns |
| 32  | Meentken 2020           | EMDR vs TAU            | Low                   | Low                                    | Low                  | Low                        | Low                              | Low           |
| 33  | Meiser-Stedman 2017     | CT vs WL               | Low                   | Low                                    | Low                  | Low                        | Low                              | Low           |
| 34  | Murray LK 2015          | I-TF-CBT vs TAU        | Low                   | Low                                    | Low                  | Low                        | Low                              | Low           |
| 35  | Najavits 2006           | I-nTF-CBT vs TAU       | Low                   | Some concerns                          | High                 | Low                        | Some concerns                    | High          |

| No. | Study ID                  | Treatments            | Randomization process | Deviations from intended interventions | Missing outcome data | Measurement of the outcome | Selection of the reported result | Overall Bias  |
|-----|---------------------------|-----------------------|-----------------------|----------------------------------------|----------------------|----------------------------|----------------------------------|---------------|
| 36  | Nixon RD 2011             | I-TF-CBT vs CT        | Some concerns         | Some concerns                          | Low                  | Low                        | Low                              | Some concerns |
| 37  | Ooi 2016                  | G-TF-CBT vs WL        | Low                   | Low                                    | Low                  | Some concerns              | Low                              | Some concerns |
| 38  | Peltonen 2019             | BT vs TAU             | Low                   | Low                                    | Low                  | Some concerns              | Low                              | Some concerns |
| 39  | Pfeiffer 2018             | G-TF-CBT vs TAU       | Low                   | Low                                    | Low                  | Some concerns              | High                             | High          |
| 40  | Pityaratstian N 2014      | G-TF-CBT vs WL        | Low                   | Low                                    | Low                  | Low                        | Low                              | Low           |
| 41  | Rosner R 2019             | CPT vs WL             | Low                   | Low                                    | Low                  | Low                        | Low                              | Low           |
| 42  | Rossouw 2018              | BT vs ST              | Low                   | Low                                    | Low                  | Some concerns              | Low                              | Some concerns |
| 43  | Ruf 2010                  | BT vs WL              | Low                   | Low                                    | Low                  | Low                        | Some concerns                    | Some concerns |
| 44  | Salloum A 2008            | I-TF-CBT vs G-TF-CBT  | Some concerns         | Some concerns                          | Low                  | Low                        | Some concerns                    | Some concerns |
| 45  | Salloum A 2012            | G-TF-CBT vs G-nTF-CBT | Low                   | Some concerns                          | Low                  | Some concerns              | Low                              | Some concerns |
| 46  | Santiago 2018             | G-TF-CBT vs WL        | Low                   | Low                                    | Low                  | Some concerns              | Low                              | Some concerns |
| 47  | Schauer 2008              | BT vs SM              | Low                   | Low                                    | Low                  | Low                        | Some concerns                    | Some concerns |
| 48  | Scheeringa 2011           | I-TF-CBT vs WL        | Low                   | Low                                    | Some concerns        | Some concerns              | Some concerns                    | Some concerns |
| 49  | Schottelkorb 2012         | PT vs I-TF-CBT        | Low                   | High                                   | Some concerns        | Low                        | Some concerns                    | High          |
| 50  | Shechtman 2010            | ST vs WL              | Low                   | High                                   | Some concerns        | Some concerns              | Low                              | High          |
| 51  | Shein-Szydlo 2016         | I-TF-CBT vs WL        | Low                   | Low                                    | Low                  | Low                        | Low                              | Low           |
| 52  | Smith P 2007              | I-TF-CBT vs WL        | Low                   | Low                                    | Low                  | Low                        | Low                              | Low           |
| 53  | Stein 2003                | G-TF-CBT vs WL        | Low                   | High                                   | Low                  | Some concerns              | Low                              | High          |
| 54  | Tol 2008                  | G-TF-CBT vs WL        | Low                   | Low                                    | Low                  | Some concerns              | Low                              | Some concerns |
| 55  | Tol 2014                  | G-TF-CBT vs WL        | Low                   | Some concerns                          | Low                  | Some concerns              | High                             | High          |
| 56  | PYCES (unpublished trial) | I-TF-CBT vs TAU       | NA                    | NA                                     | NA                   | NA                         | NA                               | NA            |

**eAppendix 7. Network plot for each outcome**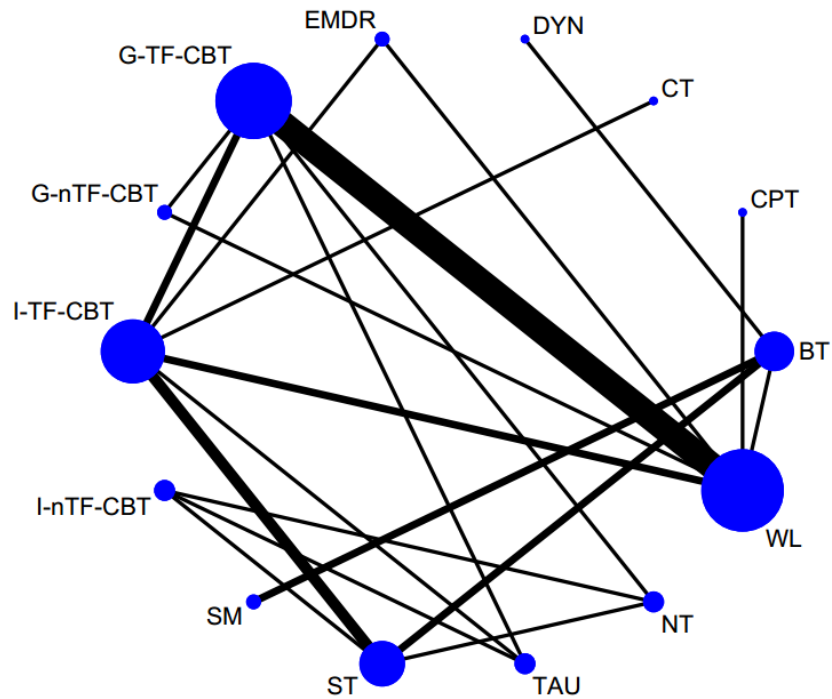**Network of eligible comparisons for efficacy at follow-up**



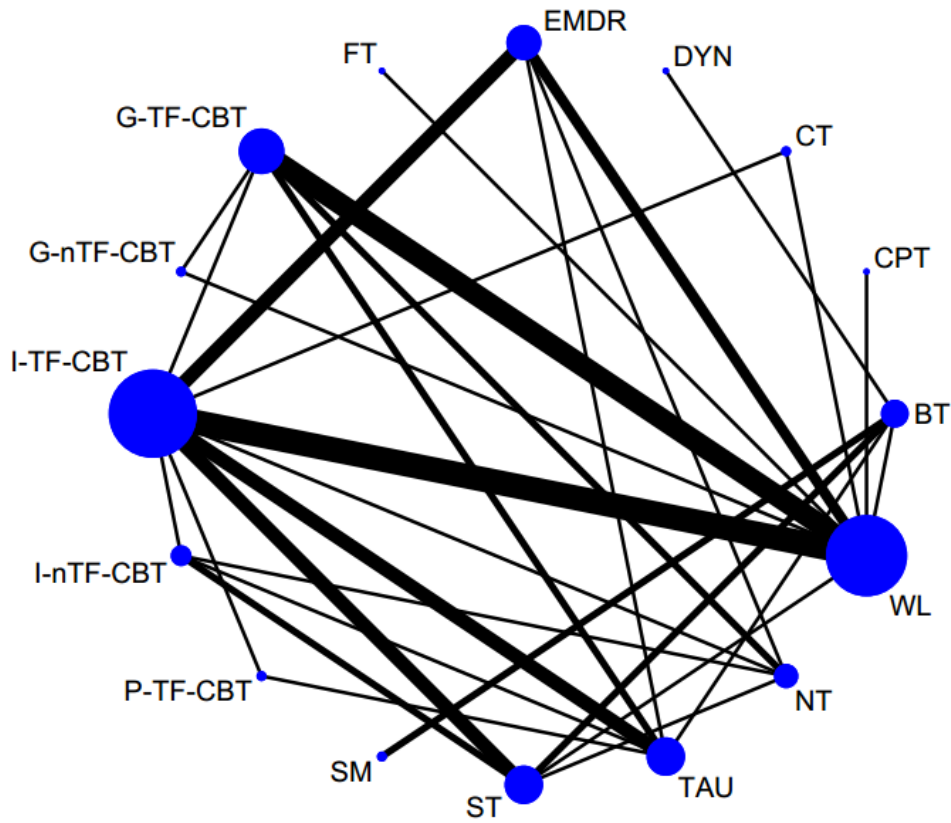

Network of eligible comparisons for all-cause discontinuation

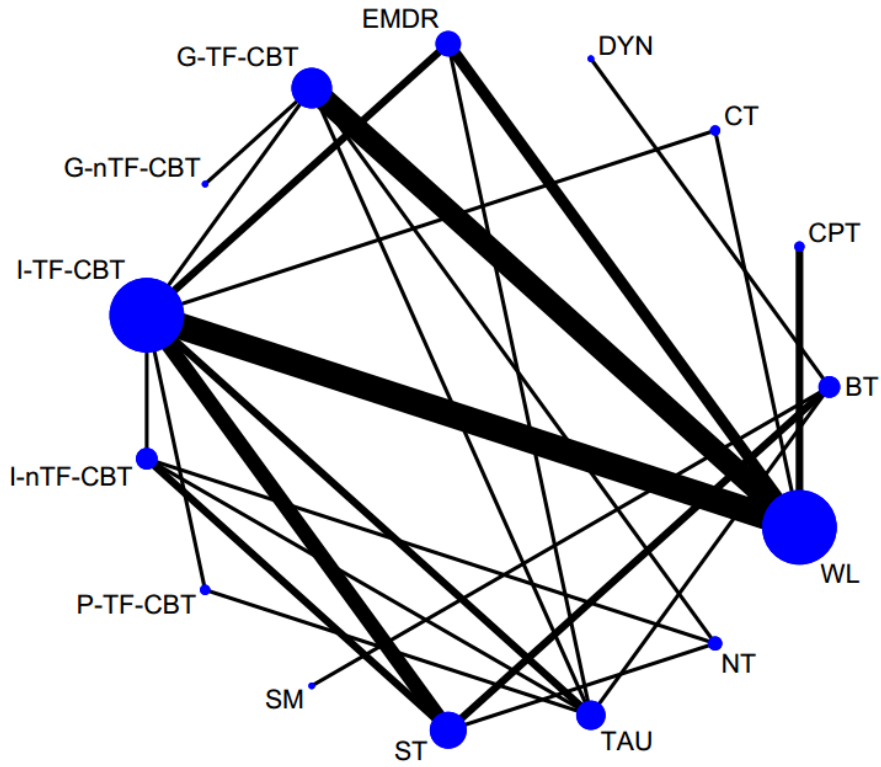

**Network of eligible comparisons for depressive symptoms**

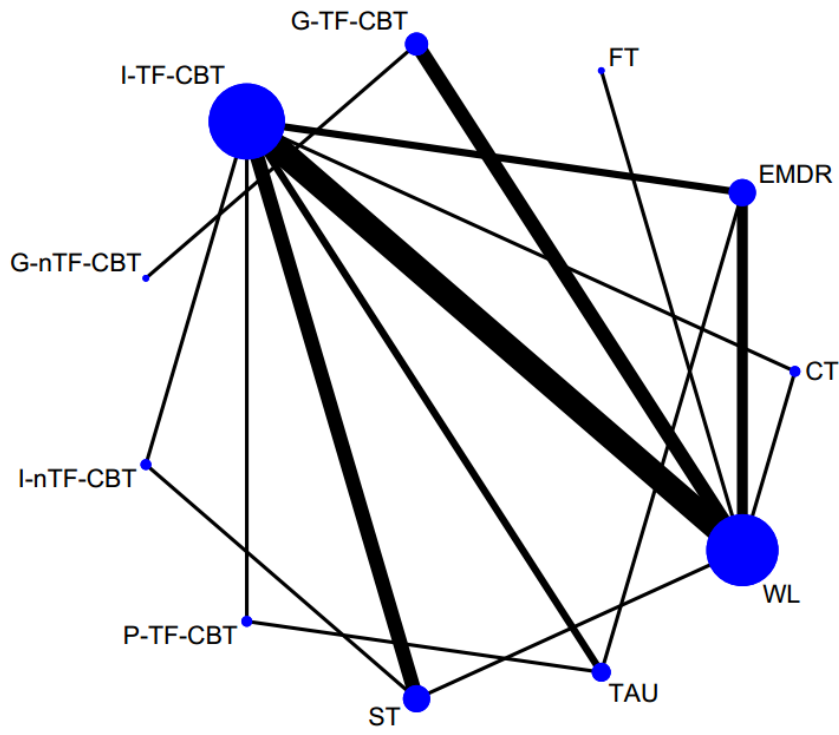

Network of eligible comparisons for anxiety symptoms

## eAppendix 8. Results from pairwise meta-analysis for each outcome: numbers, estimates, heterogeneity

### a. Summary numbers of studies and patients from pair-wise meta-analysis of direct comparisons

|                      | Efficacy at post-treatment (N/n)* | Efficacy at follow-up (N/n) | All-cause discontinuation (N/n) | Depressive symptoms (N/n) | Anxiety symptoms (N/n) |
|----------------------|-----------------------------------|-----------------------------|---------------------------------|---------------------------|------------------------|
| <b>BT vs.</b>        |                                   |                             |                                 |                           |                        |
| DYN                  | 1/38                              | 1/38                        | 1/15                            | 1/38                      | NA                     |
| SM                   | 1/31                              | 2/77                        | 2/78                            | 1/47                      | NA                     |
| ST                   | 2/113                             | 2/113                       | 2/124                           | 2/113                     | NA                     |
| TAU                  | 1/38                              | NA                          | 1/50                            | 1/25                      | NA                     |
| WL                   | 1/25                              | 1/25                        | 1/26                            | NA                        | NA                     |
| <b>CPT vs.</b>       |                                   |                             |                                 |                           |                        |
| WL                   | 2/67                              | 1/30                        | 1/38                            | 2/67                      | NA                     |
| <b>CT vs.</b>        |                                   |                             |                                 |                           |                        |
| I-TF-CBT             | 1/33                              | 1/33                        | 1/34                            | 1/33                      | 1/33                   |
| WL                   | 1/26                              | NA                          | 1/29                            | 1/26                      | 1/26                   |
| <b>EMDR vs.</b>      |                                   |                             |                                 |                           |                        |
| I-TF-CBT             | 4/196                             | 1/85                        | 4/231                           | 2/106                     | 2/106                  |
| NT                   | 1/77                              | NA                          | 1/99                            | NA                        | NA                     |
| TAU                  | 1/74                              | NA                          | 1/74                            | 1/74                      | 1/74                   |
| WL                   | 4/150                             | 1/32                        | 3/121                           | 3/117                     | 3/117                  |
| <b>FT vs.</b>        |                                   |                             |                                 |                           |                        |
| WL                   | 1/150                             | NA                          | 1/150                           | NA                        | 1/150                  |
| <b>G-TF-CBT vs.</b>  |                                   |                             |                                 |                           |                        |
| G-nTF-CBT            | 1/66                              | 1/64                        | 1/70                            | 1/64                      | 1/64                   |
| I-TF-CBT             | 1/45                              | 2/116                       | 1/56                            | 1/45                      | NA                     |
| NT                   | 2/101                             | 1/16                        | 2/101                           | 1/16                      | NA                     |
| TAU                  | 2/720                             | 1/640                       | 2/736                           | 1/84                      | NA                     |
| WL                   | 7/1038                            | 7/991                       | 6/773                           | 6/1002                    | 4/632                  |
| <b>G-nTF-CBT vs.</b> |                                   |                             |                                 |                           |                        |
| WL                   | 1/78                              | 1/77                        | 1/82                            | NA                        | NA                     |

|                      | Efficacy at post-treatment (N/n)* | Efficacy at follow-up (N/n) | All-cause discontinuation (N/n) | Depressive symptoms (N/n) | Anxiety symptoms (N/n) |
|----------------------|-----------------------------------|-----------------------------|---------------------------------|---------------------------|------------------------|
| <b>I-TF-CBT vs.</b>  |                                   |                             |                                 |                           |                        |
| I-nTF-CBT            | 1/79                              | NA                          | 1/104                           | 1/75                      | 1/54                   |
| NT                   | 1/78                              | NA                          | 1/99                            | NA                        | NA                     |
| P-TF-CBT             | 1/68                              | NA                          | 1/75                            | 1/68                      | 1/68                   |
| PT                   | 1/26                              | NA                          | NA                              | NA                        | NA                     |
| ST                   | 5/453                             | 3/198                       | 4/478                           | 4/380                     | 4/443                  |
| TAU                  | 4/460                             | 1/6                         | 4/525                           | 2/187                     | 2/183                  |
| WL                   | 7/435                             | 2/192                       | 7/473                           | 7/433                     | 7/436                  |
| <b>I-nTF-CBT vs.</b> |                                   |                             |                                 |                           |                        |
| NT                   | 1/22                              | 1/22                        | 1/28                            | 1/22                      | NA                     |
| ST                   | 2/66                              | 1/20                        | 2/87                            | 2/66                      | 1/46                   |
| TAU                  | 1/26                              | 1/26                        | 1/33                            | 1/26                      | NA                     |
| <b>NT vs.</b>        |                                   |                             |                                 |                           |                        |
| ST                   | 1/22                              | 1/22                        | 1/24                            | 1/22                      | NA                     |
| <b>P-TF-CBT vs.</b>  |                                   |                             |                                 |                           |                        |
| TAU                  | 1/44                              | NA                          | 1/50                            | 1/44                      | 1/44                   |
| <b>ST vs.</b>        |                                   |                             |                                 |                           |                        |
| WL                   | 1/107                             | NA                          | 1/136                           | NA                        | 1/50                   |

\*N= number of studies; n= number of patients.

BT= Behavioral therapy. CPT= Cognitive processing therapy. CT= Cognitive therapy. DYN= Psychodynamic therapy. EMDR= Eye movement desensitization and reprocessing. FT = Family therapy. G-TF-CBT= Group trauma-focused cognitive behavioral therapy. G-nTF-CBT= Group non-trauma-focused cognitive behavioral therapy. I-TF-CBT= Individual trauma-focused cognitive behavioral therapy. I-nTF-CBT= Individual non-trauma-focused cognitive behavioral therapy. NT= No treatment. P-TF-CBT = Parent-only trauma-focused cognitive behavioral therapy. PT= Play therapy. SM= Stress management. ST= Supportive therapy. TAU= Treatment as usual. WL= Waitlist. NA= Not available.

## b. Summary estimates from pair-wise meta-analysis of direct comparisons\*

|                      | Efficacy at post-treatment<br>SMD (95% CI) | Efficacy at follow-up<br>SMD (95% CI)   | All-cause discontinuation<br>OR (95% CI) | Depressive symptoms<br>SMD (95% CI)     | Anxiety symptoms<br>SMD (95% CI)        |
|----------------------|--------------------------------------------|-----------------------------------------|------------------------------------------|-----------------------------------------|-----------------------------------------|
| <b>BT vs.</b>        |                                            |                                         |                                          |                                         |                                         |
| DYN                  | -0.49<br>(-1.13 to 0.16)                   | -0.54<br>(-1.18 to 0.11)                | 1.00<br>(0.21 to 4.76)                   | -0.08<br>(-0.71 to 0.56)                | NA                                      |
| SM                   | -0.01<br>(-0.72 to 0.69)                   | 0.06<br>(-0.39 to 0.51)                 | 0.28<br>(0.01 to 7.26)                   | -0.08<br>(-0.65 to 0.50)                | NA                                      |
| ST                   | -1.16<br>(-2.34 to 0.02)                   | <b>-1.27</b><br><b>(-2.18 to -0.36)</b> | 0.89<br>(0.33 to 2.41)                   | <b>-1.02</b><br><b>(-1.95 to -0.09)</b> | NA                                      |
| TAU                  | -0.26<br>(-0.91 to 0.39)                   | NA                                      | 5.22<br>(0.58 to 47.10)                  | 0.12<br>(-0.67 to 0.91)                 | NA                                      |
| WL                   | -0.70<br>(-1.51 to 0.11)                   | <b>-1.03</b><br><b>(-1.87 to -0.19)</b> | 3.24<br>(0.12 to 87.13)                  | NA                                      | NA                                      |
| <b>CPT vs.</b>       |                                            |                                         |                                          |                                         |                                         |
| WL                   | <b>-1.34</b><br><b>(-1.88 to -0.81)</b>    | <b>-1.90</b><br><b>(-2.78 to -1.03)</b> | NA                                       | <b>-1.19</b><br><b>(-1.72 to -0.67)</b> | NA                                      |
| <b>CT vs.</b>        |                                            |                                         |                                          |                                         |                                         |
| I-TF-CBT             | -0.01<br>(-0.69 to 0.68)                   | -0.07<br>(-0.75 to 0.61)                | 1.00<br>(0.25 to 4.08)                   | 0.01<br>(-0.68 to 0.69)                 | 0.08<br>(-0.60 to 0.77)                 |
| WL                   | <b>-1.34</b><br><b>(-2.19 to -0.48)</b>    | NA                                      | 0.50<br>(0.04 to 6.22)                   | -0.76<br>(-1.56 to 0.04)                | <b>-1.09</b><br><b>(-1.92 to -0.26)</b> |
| <b>EMDR vs.</b>      |                                            |                                         |                                          |                                         |                                         |
| I-TF-CBT             | -0.16<br>(-0.44 to 0.12)                   | -0.12<br>(-0.55 to 0.31)                | 0.78<br>(0.10 to 6.43)                   | <b>-0.43</b><br><b>(-0.82 to -0.04)</b> | -0.81<br>(-1.90 to 0.28)                |
| NT                   | <b>-0.79</b><br><b>(-1.29 to -0.29)</b>    | NA                                      | 1.16<br>(0.59 to 2.30)                   | NA                                      | NA                                      |
| TAU                  | 0.04<br>(-0.42 to 0.50)                    | NA                                      | <b>5.89</b><br><b>(2.05 to 16.91)</b>    | -0.15<br>(-0.61 to 0.31)                | -0.05<br>(-0.50 to 0.41)                |
| WL                   | <b>-0.43</b><br><b>(-0.80 to -0.07)</b>    | -0.55<br>(-1.25 to 0.16)                | 10.08<br>(0.52 to 194.16)                | -0.32<br>(-0.75 to 0.11)                | -0.25<br>(-0.78 to 0.29)                |
| <b>FT vs.</b>        |                                            |                                         |                                          |                                         |                                         |
| WL                   | -0.19<br>(-0.51 to 0.14)                   | NA                                      | <b>3.95</b><br><b>(1.43 to 10.94)</b>    | NA                                      | -0.05<br>(-0.37 to 0.27)                |
| <b>G-TF-CBT vs.</b>  |                                            |                                         |                                          |                                         |                                         |
| G-nTF-CBT            | 0.23<br>(-0.25 to 0.72)                    | 0.24<br>(-0.26 to 0.73)                 | <b>18.46</b><br><b>(2.24 to 152.32)</b>  | 0.48<br>(-0.02 to 0.98)                 | 0.01<br>(-0.48 to 0.50)                 |
| I-TF-CBT             | 0.23<br>(-0.35 to 0.82)                    | 0.17<br>(-0.26 to 0.61)                 | 2.82<br>(0.28 to 28.56)                  | 0.31<br>(-0.28 to 0.90)                 | NA                                      |
| NT                   | -1.30<br>(-3.53 to 0.93)                   | <b>-1.21</b><br><b>(-2.29 to -0.14)</b> | 0.46<br>(0.08 to 2.75)                   | -0.68<br>(-1.69 to 0.33)                | NA                                      |
| TAU                  | <b>-0.44</b><br><b>(-0.59 to -0.29)</b>    | <b>-0.53</b><br><b>(-0.69 to -0.38)</b> | 1.07<br>(0.03 to 39.36)                  | <b>-0.64</b><br><b>(-1.08 to -0.20)</b> | NA                                      |
| WL                   | <b>-0.39</b><br><b>(-0.70 to -0.07)</b>    | <b>-0.25</b><br><b>(-0.48 to -0.02)</b> | 0.77<br>(0.13 to 4.70)                   | <b>-0.23</b><br><b>(-0.45 to -0.02)</b> | -0.12<br>(-0.27 to 0.04)                |
| <b>G-nTF-CBT vs.</b> |                                            |                                         |                                          |                                         |                                         |
| WL                   | <b>-1.13</b><br><b>(-1.61 to -0.65)</b>    | 0.00<br>(-0.45 to 0.45)                 | 3.16<br>(0.32 to 31.70)                  | NA                                      | NA                                      |
| <b>I-TF-CBT vs.</b>  |                                            |                                         |                                          |                                         |                                         |
| I-nTF-CBT            | -0.11<br>(-0.55 to 0.33)                   | NA                                      | 0.87<br>(0.31 to 2.46)                   | -0.23<br>(-0.68 to 0.23)                | <b>-0.69</b><br><b>(-1.24 to -0.14)</b> |

|                      | Efficacy at post-treatment<br>SMD (95% CI)            | Efficacy at follow-up<br>SMD (95% CI)                 | All-cause discontinuation<br>OR (95% CI)            | Depressive symptoms<br>SMD (95% CI)                   | Anxiety symptoms<br>SMD (95% CI)                      |
|----------------------|-------------------------------------------------------|-------------------------------------------------------|-----------------------------------------------------|-------------------------------------------------------|-------------------------------------------------------|
| NT                   | <b><u>-0.57</u></b><br><b><u>(-1.05 to -0.08)</u></b> | NA                                                    | <b><u>5.30</u></b><br><b><u>(1.84 to 15.29)</u></b> | NA                                                    | NA                                                    |
| P-TF-CBT             | -0.35<br>(-0.86 to 0.16)                              | NA                                                    | 0.64<br>(0.13 to 3.10)                              | -0.25<br>(-0.76 to 0.26)                              | -0.23<br>(-0.74 to 0.28)                              |
| PT                   | 0.22<br>(-0.56 to 0.99)                               | NA                                                    | NA                                                  | NA                                                    | NA                                                    |
| ST                   | <b><u>-0.61</u></b><br><b><u>(-1.22 to -0.01)</u></b> | <b><u>-0.39</u></b><br><b><u>(-0.67 to -0.10)</u></b> | 0.81<br>(0.32 to 2.05)                              | <b><u>-0.40</u></b><br><b><u>(-0.64 to -0.17)</u></b> | <b><u>-0.30</u></b><br><b><u>(-0.48 to -0.11)</u></b> |
| TAU                  | <b><u>-0.80</u></b><br><b><u>(-1.17 to -0.43)</u></b> | NA                                                    | 0.99<br>(0.62 to 1.58)                              | <b><u>-0.61</u></b><br><b><u>(-0.92 to -0.31)</u></b> | <b><u>-0.35</u></b><br><b><u>(-0.65 to -0.05)</u></b> |
| WL                   | <b><u>-0.99</u></b><br><b><u>(-1.53 to -0.44)</u></b> | <b><u>-0.48</u></b><br><b><u>(-0.77 to -0.19)</u></b> | 1.54<br>(0.86 to 2.76)                              | <b><u>-0.64</u></b><br><b><u>(-1.03 to -0.25)</u></b> | <b><u>-0.57</u></b><br><b><u>(-0.92 to -0.21)</u></b> |
| <b>I-nTF-CBT vs.</b> |                                                       |                                                       |                                                     |                                                       |                                                       |
| NT                   | -0.48<br>(-1.34 to 0.37)                              | <b><u>-1.17</u></b><br><b><u>(-2.09 to -0.26)</u></b> | 15.48<br>(0.78 to 308.11)                           | 0.11<br>(-0.73 to 0.95)                               | NA                                                    |
| ST                   | 0.08<br>(-0.41 to 0.57)                               | -0.84<br>(-1.76 to 0.08)                              | 2.02<br>(0.44 to 9.34)                              | 0.21<br>(-0.27 to 0.70)                               | -0.18<br>(-0.76 to 0.41)                              |
| TAU                  | <b><u>-0.85</u></b><br><b><u>(-1.65 to -0.04)</u></b> | -0.40<br>(-1.17 to 0.38)                              | 1.14<br>(0.21 to 6.16)                              | -0.66<br>(-1.45 to 0.14)                              | NA                                                    |
| <b>NT vs.</b>        |                                                       |                                                       |                                                     |                                                       |                                                       |
| ST                   | 0.19<br>(-0.65 to 1.03)                               | 0.15<br>(-0.69 to 0.99)                               | 0.17<br>(0.01 to 3.90)                              | 0.10<br>(-0.74 to 0.94)                               | NA                                                    |
| <b>P-TF-CBT vs.</b>  |                                                       |                                                       |                                                     |                                                       |                                                       |
| TAU                  | -0.55<br>(-1.15 to 0.06)                              | NA                                                    | 1.00<br>(0.18 to 5.51)                              | -0.47<br>(-1.07 to 0.13)                              | -0.20<br>(-0.79 to 0.39)                              |
| <b>ST vs.</b>        |                                                       |                                                       |                                                     |                                                       |                                                       |
| WL                   | <b><u>-0.68</u></b><br><b><u>(-1.10 to -0.27)</u></b> | NA                                                    | <b><u>0.34</u></b><br><b><u>(0.15 to 0.80)</u></b>  | NA                                                    | -0.20<br>(-0.61 to 0.21)                              |

Significant results are bolded and underscored.

BT= Behavioral therapy. CPT= Cognitive processing therapy. CT= Cognitive therapy. DYN= Psychodynamic therapy. EMDR= Eye movement desensitization and reprocessing. FT = Family therapy. G-TF-CBT= Group trauma-focused cognitive behavioral therapy. G-nTF-CBT= Group non-trauma-focused cognitive behavioral therapy. I-TF-CBT= Individual trauma-focused cognitive behavioral therapy. I-nTF-CBT= Individual non-trauma-focused cognitive behavioral therapy. NT= No treatment. P-TF-CBT = Parent-only trauma-focused cognitive behavioral therapy. PT= Play therapy. SM= Stress management. ST= Supportive therapy. TAU= Treatment as usual. WL= Waitlist. NA= Not available.

### c. Heterogeneity test result, $I^2$ and between-study variance $\tau^2$ estimate

#### Efficacy at post-treatment

| Comparisons      | No. of studies | P-value | $I^2$ | $\tau^2$ |
|------------------|----------------|---------|-------|----------|
| BT vs ST*        | 2              | 0.004   | 87.8% | 0.639    |
| CPT vs WL        | 2              | 0.452   | 0.0%  | 0.000    |
| EMDR vs I-TF-CBT | 4              | 0.750   | 0.0%  | 0.000    |
| EMDR vs WL       | 4              | 0.329   | 12.8% | 0.018    |
| G-TF-CBT vs NT*  | 2              | 0.002   | 89.8% | 2.334    |
| G-TF-CBT vs TAU  | 2              | 0.605   | 0.0%  | 0.000    |
| G-TF-CBT vs WL*  | 7              | 0.000   | 80.4% | 0.131    |
| I-TF-CBT vs ST*  | 5              | 0.000   | 88.8% | 0.422    |
| I-TF-CBT vs TAU  | 4              | 0.051   | 61.5% | 0.078    |
| I-TF-CBT vs WL*  | 7              | 0.000   | 83.2% | 0.420    |
| I-nTF-CBT vs ST  | 2              | 0.323   | 0.0%  | 0.000    |

\*The comparisons between BT and ST, between G-TF-CBT and NT, between G-TF-CBT and WL, between I-TF-CBT and ST, between I-TF-CBT and WL had higher  $I^2$  values than the other comparisons.

BT= Behavioral therapy. CPT= Cognitive processing therapy. EMDR= Eye movement desensitization and reprocessing. G-TF-CBT= Group trauma-focused cognitive behavioral therapy. I-TF-CBT= Individual trauma-focused cognitive behavioral therapy. I-nTF-CBT= Individual non-trauma-focused cognitive behavioral therapy. ST= Supportive therapy. TAU= Treatment as usual. WL= Waitlist.



**Efficacy at follow-up**

| Comparisons          | No. of studies | P-value | I <sup>2</sup> | τ <sup>2</sup> |
|----------------------|----------------|---------|----------------|----------------|
| BT vs SM             | 2              | 0.495   | 0.0%           | 0.000          |
| BT vs ST*            | 2              | 0.028   | 79.2%          | 0.342          |
| G-TF-CBT vs I-TF-CBT | 2              | 0.290   | 10.6%          | 0.011          |
| G-TF-CBT vs WL*      | 7              | 0.013   | 63.0%          | 0.056          |
| I-TF-CBT vs ST       | 3              | 0.543   | 0.0%           | 0.000          |
| I-TF-CBT vs WL       | 2              | 0.439   | 0.0%           | 0.000          |

\*The comparisons between BT and ST, between G-TF-CBT and WL had higher I<sup>2</sup> values than the other comparisons.

BT= Behavioral therapy. G-TF-CBT= Group trauma-focused cognitive behavioral therapy. I-TF-CBT= Individual trauma-focused cognitive behavioral therapy. ST= Supportive therapy. WL= Waitlist.

**All-cause discontinuation**

| Comparisons      | No. of studies | P-value | I <sup>2</sup> | τ <sup>2</sup> |
|------------------|----------------|---------|----------------|----------------|
| BT vs ST         | 2              | 0.389   | 0.0%           | 0.000          |
| EMDR vs I-TF-CBT | 4              | 0.990   | 0.0%           | 0.000          |
| EMDR vs WL       | 3              | 0.153   | 46.7%          | 1.621          |
| G-TF-CBT vs TAU* | 2              | 0.049   | 74.1%          | 5.058          |
| G-TF-CBT vs WL   | 5              | 0.101   | 48.4%          | 2.060          |
| I-TF-CBT vs ST*  | 4              | 0.010   | 73.7%          | 0.590          |
| I-TF-CBT vs TAU  | 4              | 0.884   | 0.0%           | 0.000          |
| I-TF-CBT vs WL   | 6              | 0.541   | 0.0%           | 0.000          |
| I-nTF-CBT vs ST  | 2              | 0.432   | 0.0%           | 0.000          |

\*The comparisons between G-TF-CBT and TAU, between I-TF-CBT and ST had higher I<sup>2</sup> values than the other comparisons.

BT= Behavioral therapy. EMDR= Eye movement desensitization and reprocessing. G-TF-CBT= Group trauma-focused cognitive behavioral therapy. I-TF-CBT= Individual trauma-focused cognitive behavioral therapy. I-nTF-CBT= Individual non-trauma-focused cognitive behavioral therapy. ST= Supportive therapy. TAU= Treatment as usual. WL= Waitlist.

**Depressive symptoms**

| Comparisons      | No. of studies | P-value | I <sup>2</sup> | τ <sup>2</sup> |
|------------------|----------------|---------|----------------|----------------|
| BT vs ST*        | 2              | 0.021   | 81.3%          | 0.367          |
| CPT vs WL        | 2              | 0.323   | 0.0%           | 0.000          |
| EMDR vs I-TF-CBT | 2              | 0.364   | 0.0%           | 0.000          |
| EMDR vs WL       | 3              | 0.289   | 19.4%          | 0.029          |
| G-TF-CBT vs WL*  | 6              | 0.036   | 58.0%          | 0.038          |
| I-TF-CBT vs ST   | 4              | 0.285   | 20.8%          | 0.013          |
| I-TF-CBT vs TAU  | 2              | 0.537   | 0.0%           | 0.000          |
| I-TF-CBT vs WL*  | 7              | 0.004   | 68.5%          | 0.176          |
| I-nTF-CBT vs ST  | 2              | 0.966   | 0.0%           | 0.000          |

\*The comparisons between BT and ST, between G-TF-CBT and WL, between I-TF-CBT and WL had higher I<sup>2</sup> values than the other comparisons.

BT= Behavioral therapy. CPT= Cognitive processing therapy. EMDR= Eye movement desensitization and reprocessing. G-TF-CBT= Group trauma-focused cognitive behavioral therapy. I-TF-CBT= Individual trauma-focused cognitive behavioral therapy. I-nTF-CBT= Individual non-trauma-focused cognitive behavioral therapy. ST= Supportive therapy. TAU= Treatment as usual. WL= Waitlist.

**Anxiety symptoms**

| Comparisons       | No. of studies | P-value | I <sup>2</sup> | τ <sup>2</sup> |
|-------------------|----------------|---------|----------------|----------------|
| EMDR vs I-TF-CBT* | 2              | 0.042   | 75.8%          | 0.480          |
| EMDR vs WL        | 3              | 0.159   | 45.6%          | 0.101          |
| G-TF-CBT vs WL    | 4              | 0.793   | 0.0%           | 0.000          |
| I-TF-CBT vs ST    | 4              | 0.432   | 0.0%           | 0.000          |
| I-TF-CBT vs TAU   | 2              | 0.674   | 0.0%           | 0.000          |
| I-TF-CBT vs WL*   | 7              | 0.012   | 63.5%          | 0.137          |

\*The comparisons between BT and ST, between EMDR and I-TF-CBT, between I-TF-CBT and WL had higher I<sup>2</sup> values than the other comparisons.

EMDR= Eye movement desensitization and reprocessing. G-TF-CBT= Group trauma-focused cognitive behavioral therapy. I-TF-CBT= Individual trauma-focused cognitive behavioral therapy. ST= Supportive therapy. TAU= Treatment as usual. WL= Waitlist.

## eAppendix 9. The results of network meta-analysis for secondary outcomes

|                                         |                                         |                          |                          |                          |                          |                                         |                                         |                          |                                         |                          |                                         |                         |                                         |                          |                          |
|-----------------------------------------|-----------------------------------------|--------------------------|--------------------------|--------------------------|--------------------------|-----------------------------------------|-----------------------------------------|--------------------------|-----------------------------------------|--------------------------|-----------------------------------------|-------------------------|-----------------------------------------|--------------------------|--------------------------|
| CPT                                     | NA                                      | NA                       | NA                       | NA                       | NA                       | NA                                      | NA                                      | NA                       | NA                                      | NA                       | NA                                      | NA                      | NA                                      | NA                       | NA                       |
| -0.41<br>(-1.28 to 0.46)                | <b>BT</b>                               | NA                       | NA                       | NA                       | NA                       | NA                                      | NA                                      | NA                       | NA                                      | NA                       | NA                                      | NA                      | NA                                      | NA                       | NA                       |
| -0.39<br>(-1.40 to 0.61)                | 0.02<br>(-0.93 to 0.97)                 | <b>G-nTF-CBT</b>         | NA                       | NA                       | 0.60<br>(-0.36 to 1.57)  | 0.41<br>(-0.36 to 1.17)                 | 0.43<br>(-0.39 to 1.24)                 | 0.27<br>(-0.73 to 1.26)  | -0.01<br>(-0.67 to 0.65)                | -0.01<br>(-0.93 to 0.91) | 0.09<br>(-0.70 to 0.89)                 | NA                      | -0.08<br>(-0.81 to 0.64)                | 0.16<br>(-0.69 to 1.01)  | -0.03<br>(-0.94 to 0.88) |
| -0.48<br>(-1.66 to 0.69)                | -0.08<br>(-0.86 to 0.71)                | -0.09<br>(-1.32 to 1.14) | <b>SM</b>                | NA                       | NA                       | NA                                      | NA                                      | NA                       | NA                                      | NA                       | NA                                      | NA                      | NA                                      | NA                       | NA                       |
| -0.49<br>(-1.69 to 0.72)                | -0.08<br>(-0.91 to 0.75)                | -0.09<br>(-1.36 to 1.17) | -0.01<br>(-1.14 to 1.14) | <b>DYN</b>               | NA                       | NA                                      | NA                                      | NA                       | NA                                      | NA                       | NA                                      | NA                      | NA                                      | NA                       | NA                       |
| -0.54<br>(-1.47 to 0.38)                | -0.13<br>(-0.98 to 0.71)                | -0.15<br>(-1.16 to 0.86) | -0.06<br>(-1.21 to 1.09) | -0.06<br>(-1.24 to 1.13) | <b>CT</b>                | -0.20<br>(-0.82 to 0.43)                | -0.18<br>(-0.89 to 0.53)                | -0.34<br>(-1.23 to 0.56) | -0.61<br>(-1.31 to 0.08)                | -0.61<br>(-1.43 to 0.20) | -0.51<br>(-1.18 to 0.16)                | NA                      | <b>-0.69</b><br><b>(-1.32 to -0.06)</b> | -0.44<br>(-1.17 to 0.29) | -0.64<br>(-1.47 to 0.20) |
| -0.64<br>(-1.33 to 0.06)                | -0.23<br>(-0.77 to 0.31)                | -0.24<br>(-1.04 to 0.55) | -0.15<br>(-1.11 to 0.80) | -0.15<br>(-1.14 to 0.84) | -0.09<br>(-0.75 to 0.56) | <b>I-TF-CBT</b>                         | 0.02<br>(-0.35 to 0.38)                 | -0.14<br>(-0.78 to 0.50) | <b>-0.42</b><br><b>(-0.80 to -0.04)</b> | -0.42<br>(-0.94 to 0.11) | <b>-0.31</b><br><b>(-0.57 to -0.05)</b> | NA                      | <b>-0.49</b><br><b>(-0.73 to -0.25)</b> | -0.25<br>(-0.63 to 0.13) | -0.44<br>(-1.04 to 0.16) |
| -0.70<br>(-1.45 to 0.06)                | -0.29<br>(-0.94 to 0.35)                | -0.31<br>(-1.16 to 0.54) | -0.22<br>(-1.23 to 0.80) | -0.21<br>(-1.27 to 0.84) | -0.16<br>(-0.90 to 0.58) | -0.06<br>(-0.45 to 0.33)                | <b>EMDR</b>                             | -0.16<br>(-0.87 to 0.55) | -0.44<br>(-0.91 to 0.04)                | -0.44<br>(-1.07 to 0.20) | -0.33<br>(-0.77 to 0.11)                | NA                      | <b>-0.51</b><br><b>(-0.88 to -0.14)</b> | -0.27<br>(-0.71 to 0.17) | -0.46<br>(-1.12 to 0.21) |
| -0.78<br>(-1.75 to 0.19)                | -0.37<br>(-1.23 to 0.48)                | -0.39<br>(-1.43 to 0.65) | -0.30<br>(-1.46 to 0.86) | -0.30<br>(-1.49 to 0.90) | -0.24<br>(-1.18 to 0.71) | -0.14<br>(-0.83 to 0.54)                | -0.08<br>(-0.85 to 0.69)                | <b>P-TF-CBT</b>          | -0.28<br>(-1.01 to 0.46)                | -0.27<br>(-1.10 to 0.55) | -0.17<br>(-0.86 to 0.52)                | NA                      | -0.35<br>(-1.03 to 0.33)                | -0.11<br>(-0.77 to 0.56) | -0.30<br>(-1.17 to 0.58) |
| <b>-0.87</b><br><b>(-1.56 to -0.18)</b> | -0.46<br>(-1.07 to 0.15)                | -0.48<br>(-1.21 to 0.26) | -0.38<br>(-1.38 to 0.61) | -0.38<br>(-1.41 to 0.65) | -0.33<br>(-1.02 to 0.37) | -0.23<br>(-0.55 to 0.08)                | -0.17<br>(-0.60 to 0.27)                | -0.09<br>(-0.83 to 0.65) | <b>G-TF-CBT</b>                         | 0.01<br>(-0.64 to 0.64)  | 0.10<br>(-0.33 to 0.54)                 | NA                      | -0.07<br>(-0.37 to 0.22)                | 0.17<br>(-0.35 to 0.69)  | -0.02<br>(-0.65 to 0.60) |
| <b>-1.02</b><br><b>(-1.84 to -0.20)</b> | -0.61<br>(-1.25 to 0.03)                | -0.63<br>(-1.52 to 0.27) | -0.53<br>(-1.55 to 0.48) | -0.53<br>(-1.58 to 0.52) | -0.48<br>(-1.26 to 0.31) | -0.38<br>(-0.83 to 0.06)                | -0.32<br>(-0.89 to 0.25)                | -0.24<br>(-1.04 to 0.56) | -0.15<br>(-0.67 to 0.37)                | <b>I-nTF-CBT</b>         | 0.10<br>(-0.43 to 0.63)                 | NA                      | -0.08<br>(-0.64 to 0.49)                | 0.17<br>(-0.48 to 0.82)  | -0.02<br>(-0.81 to 0.77) |
| <b>-1.10</b><br><b>(-1.85 to -0.34)</b> | <b>-0.69</b><br><b>(-1.17 to -0.20)</b> | -0.70<br>(-1.55 to 0.14) | -0.61<br>(-1.53 to 0.31) | -0.61<br>(-1.57 to 0.35) | -0.55<br>(-1.27 to 0.17) | <b>-0.46</b><br><b>(-0.77 to -0.15)</b> | -0.40<br>(-0.88 to 0.09)                | -0.31<br>(-1.06 to 0.43) | -0.23<br>(-0.65 to 0.20)                | -0.08<br>(-0.53 to 0.38) | <b>ST</b>                               | NA                      | -0.18<br>(-0.50 to 0.15)                | 0.07<br>(-0.39 to 0.53)  | -0.13<br>(-0.76 to 0.51) |
| <b>-1.21</b><br><b>(-2.19 to -0.23)</b> | -0.80<br>(-1.66 to 0.06)                | -0.82<br>(-1.85 to 0.22) | -0.73<br>(-1.89 to 0.44) | -0.72<br>(-1.92 to 0.47) | -0.67<br>(-1.63 to 0.30) | -0.57<br>(-1.30 to 0.15)                | -0.51<br>(-1.31 to 0.29)                | -0.43<br>(-1.42 to 0.56) | -0.34<br>(-1.08 to 0.39)                | -0.19<br>(-0.94 to 0.56) | -0.12<br>(-0.84 to 0.61)                | <b>NT</b>               | NA                                      | NA                       | NA                       |
| <b>-1.16</b><br><b>(-1.80 to -0.51)</b> | <b>-0.75</b><br><b>(-1.33 to -0.16)</b> | -0.76<br>(-1.53 to 0.01) | -0.67<br>(-1.65 to 0.31) | -0.67<br>(-1.69 to 0.35) | -0.61<br>(-1.27 to 0.05) | <b>-0.52</b><br><b>(-0.77 to -0.26)</b> | <b>-0.46</b><br><b>(-0.84 to -0.07)</b> | -0.37<br>(-1.10 to 0.35) | <b>-0.29</b><br><b>(-0.53 to -0.04)</b> | -0.14<br>(-0.63 to 0.36) | -0.06<br>(-0.45 to 0.33)                | 0.05<br>(-0.68 to 0.79) | <b>WL</b>                               | 0.24<br>(-0.19 to 0.68)  | 0.05<br>(-0.50 to 0.60)  |
| <b>-1.17</b><br><b>(-1.92 to -0.42)</b> | <b>-0.76</b><br><b>(-1.34 to -0.19)</b> | -0.78<br>(-1.61 to 0.05) | -0.69<br>(-1.66 to 0.28) | -0.69<br>(-1.70 to 0.32) | -0.63<br>(-1.35 to 0.10) | <b>-0.53</b><br><b>(-0.87 to -0.19)</b> | <b>-0.47</b><br><b>(-0.91 to -0.04)</b> | -0.39<br>(-1.09 to 0.31) | -0.30<br>(-0.70 to 0.09)                | -0.15<br>(-0.66 to 0.35) | -0.08<br>(-0.50 to 0.35)                | 0.04<br>(-0.73 to 0.81) | -0.02<br>(-0.40 to 0.36)                | <b>TAU</b>               | -0.19<br>(-0.89 to 0.51) |
| NA                                      | NA                                      | NA                       | NA                       | NA                       | NA                       | NA                                      | NA                                      | NA                       | NA                                      | NA                       | NA                                      | NA                      | NA                                      | NA                       | <b>FT</b>                |

Treatment
  Depressive symptoms (SMD [95% CI])
  Anxiety symptoms (SMD [95% CI])

League table for depressive symptoms and anxiety symptoms associated with different treatments. Treatments are ranked according to their P-scores of surface under the curve cumulative ranking for sedation starting with the best of depressive symptoms. Results of the depressive symptoms network meta-analysis are presented in the left lower half and results from anxiety symptoms in the upper right half, if available. Comparisons between treatments should be read from left to right and the estimate is in the cell in common between the column-defining treatment and the row-defining treatment. For interpretation, a number less than zero favors the column-defining treatment of a cell, i.e. this treatment leads to a decrease in endpoint score for depressive symptoms severity rating scales. Values depicted are stander mean differences with associated 95% confidence intervals. Values depicted are odds ratio with associated 95% confidence intervals. Significant results are in bold and underlined.

BT= Behavioral therapy. CPT= Cognitive processing therapy. CT= Cognitive therapy. DYN= Psychodynamic therapy. EMDR= Eye movement desensitization and reprocessing. FT = Family therapy. G-TF-CBT= Group trauma-focused cognitive behavioral therapy. G-nTF-CBT= Group non-trauma-focused cognitive behavioral therapy. I-TF-CBT= Individual trauma-focused cognitive behavioral therapy. I-nTF-CBT= Individual non-trauma-focused cognitive behavioral therapy. NT= No treatment. P-TF-CBT = Parent-only trauma-focused cognitive behavioral therapy. SM= Stress management. ST= Supportive therapy. TAU= Treatment as usual. WL= Waitlist.

## eAppendix 10. Forest plot of network meta-analysis results for secondary outcomes

a.

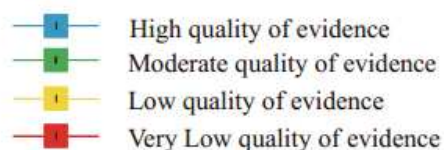

### Depressive symptoms

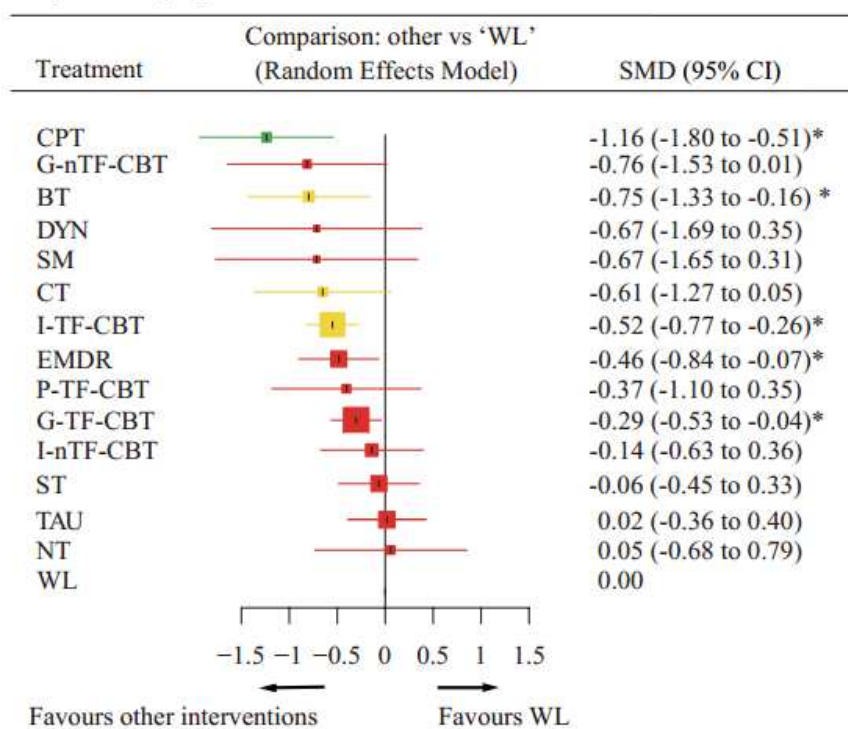

Forest plots of network meta-analysis of all trials for depressive symptoms.

Interventions were compared with waitlist, which was the reference compound. \*Significant results.

BT= Behavioral therapy. CPT= Cognitive processing therapy. CT= Cognitive therapy. DYN= Psychodynamic therapy. EMDR= Eye movement desensitization and reprocessing. G-TF-CBT= Group trauma-focused cognitive behavioral therapy. G-nTF-CBT= Group non-trauma-focused cognitive behavioral therapy. I-TF-CBT= Individual trauma-focused cognitive behavioral therapy. I-nTF-CBT= Individual non-trauma-focused cognitive behavioral therapy. NT= No treatment. P-TF-CBT = Parent-only trauma-focused cognitive behavioral therapy. SM= Stress management. ST= Supportive therapy. TAU= Treatment as usual. WL= Waitlist.

b.

- High quality of evidence
- Moderate quality of evidence
- Low quality of evidence
- Very Low quality of evidence

**Anxiety symptoms**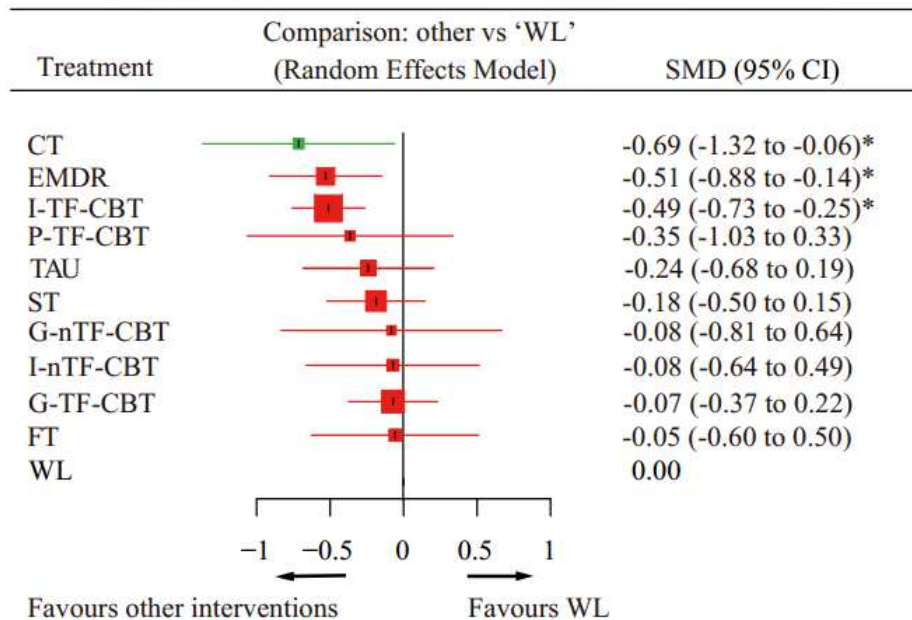

Forest plots of network meta-analysis of all trials for anxiety symptoms.

Interventions were compared with waitlist, which was the reference compound. \*Significant results. CT= Cognitive therapy. EMDR= Eye movement desensitization and reprocessing. FT = Family therapy. G-TF-CBT= Group trauma-focused cognitive behavioral therapy. G-nTF-CBT= Group non-trauma-focused cognitive behavioral therapy. I-TF-CBT= Individual trauma-focused cognitive behavioral therapy. I-nTF-CBT= Individual non-trauma-focused cognitive behavioral therapy. P-TF-CBT = Parent-only trauma-focused cognitive behavioral therapy. ST= Supportive therapy. TAU= Treatment as usual. WL= Waitlist.



**eAppendix 11. Evaluation of heterogeneity and inconsistency****a. Evaluation of heterogeneity**

| Outcomes                   | Between study variance ( $\tau^2$ ) | I <sup>2</sup> | Q      | df | P-value |
|----------------------------|-------------------------------------|----------------|--------|----|---------|
| Efficacy at post-treatment | 0.1697                              | 74.60%         | 165.25 | 42 | <0.0001 |
| Efficacy at follow-up      | 0.0292                              | 33.60%         | 28.63  | 19 | 0.0720  |
| All-cause discontinuation  | 0.2051                              | 24.80%         | 51.89  | 39 | 0.0811  |
| Depressive symptoms        | 0.0745                              | 55.50%         | 65.14  | 29 | 0.0001  |
| Anxiety symptoms           | 0.0572                              | 50.10%         | 42.08  | 21 | 0.0041  |

**b. Evaluation of inconsistency****The summary of results for incoherence**

| Outcome                    | Number of study | Number of inconsistent loops out of total | Percentage of the inconsistent loops | Number of inconsistent comparisons out of total | Percentage of the inconsistent comparisons |
|----------------------------|-----------------|-------------------------------------------|--------------------------------------|-------------------------------------------------|--------------------------------------------|
| Efficacy at post-treatment | 54              | 4/28                                      | 14.3%                                | 1/27                                            | 3.7%                                       |
| Efficacy at follow-up      | 31              | 0/6                                       | 0.0%                                 | 0/17                                            | 0.0%                                       |
| All-cause discontinuation  | 50              | 0/28                                      | 0.0%                                 | 1/27                                            | 3.7%                                       |
| Depressive symptoms        | 40              | 3/15                                      | 20.0%                                | 3/21                                            | 14.3%                                      |
| Anxiety symptoms           | 28              | 1/6                                       | 16.7%                                | 1/13                                            | 7.7%                                       |

**Evaluation of the global incoherence**

| Outcomes                   | Test of global incoherence |
|----------------------------|----------------------------|
| Efficacy at post-treatment | P = 0.938                  |
| Efficacy at follow-up      | P = 0.906                  |
| All-cause discontinuation  | P = 0.616                  |
| Depressive symptoms        | P = 0.268                  |
| Anxiety symptoms           | P = 0.064                  |

**Evaluation of the local incoherence**

Tests of local incoherence revealed that the percentages for inconsistent loops were to be expected according to empirical data with the methods in the study: Veroniki AA, Vasiliadis HS, Higgins JP, Salanti G. Evaluation of inconsistency in networks of interventions. *Int J Epidemiol.* 2013;42(1):332-345. doi:10.1093/ije/dys222.

**(a) Efficacy at post-treatment**

| Loop                               | IF    | z-value | P-value | 95% CI      | $\tau^2$ |
|------------------------------------|-------|---------|---------|-------------|----------|
| BT vs I-nTF-CBT vs ST vs TAU       | 1.953 | 1.656   | 0.0978  | (0.00,4.27) | 0.3344   |
| EMDR vs I-nTF-CBT vs NT vs TAU     | 1.637 | 2.390   | 0.0168  | (0.29,2.98) | 0.0000   |
| G-TF-CBT vs I-nTF-CBT vs NT vs TAU | 1.432 | 0.828   | 0.4075  | (0.00,4.82) | 0.2139   |
| EMDR vs I-TF-CBT vs TAU            | 1.145 | 2.583   | 0.0098  | (0.28,2.01) | 0.0676   |
| WL vs EMDR vs I-TF-CBT             | 1.033 | 2.034   | 0.0419  | (0.04,2.03) | 0.2678   |
| WL vs BT vs ST                     | 1.021 | 2.012   | 0.0442  | (0.03,2.02) | 0.0000   |
| BT vs I-TF-CBT vs ST vs TAU        | 0.943 | 1.059   | 0.2898  | (0.00,2.69) | 0.3108   |
| WL vs G-TF-CBT vs NT vs ST         | 0.942 | 0.887   | 0.3749  | (0.00,3.02) | 0.1751   |
| I-TF-CBT vs I-nTF-CBT vs ST        | 0.724 | 0.829   | 0.4071  | (0.00,2.43) | 0.3723   |
| WL vs EMDR vs NT vs ST             | 0.674 | 1.192   | 0.2332  | (0.00,1.78) | 0.0000   |
| I-TF-CBT vs I-nTF-CBT vs NT        | 0.645 | 1.185   | 0.2359  | (0.00,1.71) | 0.0000   |
| WL vs BT vs G-TF-CBT vs TAU        | 0.535 | 0.700   | 0.4838  | (0.00,2.03) | 0.1078   |
| WL vs EMDR vs G-TF-CBT vs TAU      | 0.519 | 0.971   | 0.3317  | (0.00,1.57) | 0.0960   |
| WL vs G-TF-CBT vs G-nTF-CBT        | 0.510 | 0.798   | 0.4248  | (0.00,1.76) | 0.1313   |
| WL vs CT vs I-TF-CBT               | 0.347 | 0.313   | 0.7541  | (0.00,2.52) | 0.4204   |

| Loop                          | IF    | z-value | P-value | 95% CI      | $\tau^2$ |
|-------------------------------|-------|---------|---------|-------------|----------|
| I-TF-CBT vs P-TF-CBT vs TAU   | 0.343 | 0.474   | 0.6357  | (0.00,1.76) | 0.1341   |
| WL vs G-TF-CBT vs I-TF-CBT    | 0.328 | 0.512   | 0.6086  | (0.00,1.58) | 0.2106   |
| WL vs I-TF-CBT vs ST          | 0.306 | 0.382   | 0.7024  | (0.00,1.87) | 0.4210   |
| EMDR vs I-TF-CBT vs NT        | 0.277 | 0.620   | 0.5356  | (0.00,1.15) | 0.0174   |
| WL vs EMDR vs G-TF-CBT vs NT  | 0.244 | 0.323   | 0.7464  | (0.00,1.72) | 0.1539   |
| I-TF-CBT vs I-nTF-CBT vs TAU  | 0.241 | 0.353   | 0.7243  | (0.00,1.58) | 0.1011   |
| I-TF-CBT vs NT vs ST          | 0.235 | 0.216   | 0.8291  | (0.00,2.37) | 0.4216   |
| EMDR vs G-TF-CBT vs NT vs TAU | 0.205 | 0.134   | 0.8931  | (0.00,3.20) | 0.2139   |
| WL vs BT vs I-TF-CBT vs TAU   | 0.151 | 0.153   | 0.8788  | (0.00,2.09) | 0.2773   |
| I-nTF-CBT vs NT vs ST         | 0.133 | 0.197   | 0.8438  | (0.00,1.46) | 0.0000   |
| G-TF-CBT vs I-TF-CBT vs NT    | 0.133 | 0.301   | 0.7636  | (0.00,1.00) | 0.0000   |
| G-TF-CBT vs I-TF-CBT vs TAU   | 0.034 | 0.073   | 0.9419  | (0.00,0.94) | 0.0554   |
| WL vs BT vs EMDR vs TAU       | 0.018 | 0.029   | 0.9765  | (0.00,1.20) | 0.0000   |

BT= Behavioral therapy. CT= Cognitive therapy. EMDR= Eye movement desensitization and reprocessing. G-TF-CBT= Group trauma-focused cognitive behavioral therapy. G-nTF-CBT= Group non-trauma-focused cognitive behavioral therapy. I-TF-CBT= Individual trauma-focused cognitive behavioral therapy. I-nTF-CBT= Individual non-trauma-focused cognitive behavioral therapy. NT= No treatment. P-TF-CBT= Parent-only trauma-focused cognitive behavioral therapy. ST= Supportive therapy. TAU= Treatment as usual. WL= Waitlist.

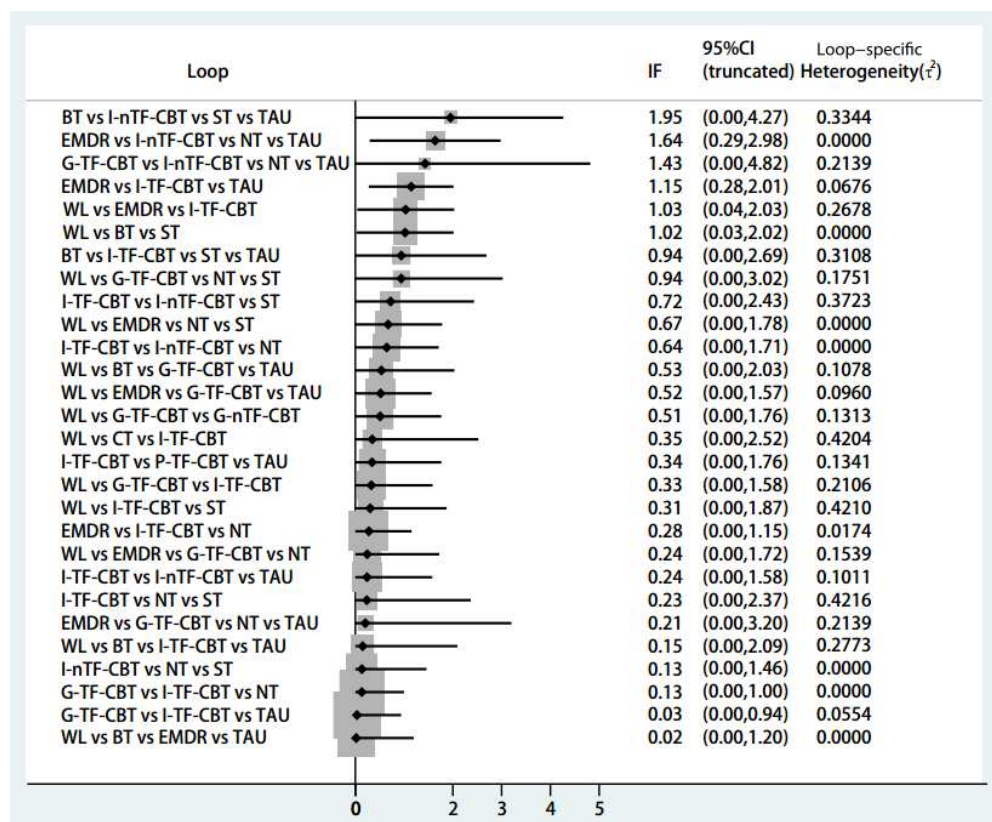

(b) Efficacy at follow-up

| Loop                               | IF    | z-value | P-value | 95% CI      | $\tau^2$ |
|------------------------------------|-------|---------|---------|-------------|----------|
| G-TF-CBT vs I-TF-CBT vs NT vs ST   | 0.851 | 1.144   | 0.2525  | (0.00,2.31) | 0.0000   |
| G-TF-CBT vs G-nTF-CBT vs WL        | 0.487 | 0.991   | 0.3217  | (0.00,1.45) | 0.0560   |
| BT vs I-TF-CBT vs ST vs WL         | 0.301 | 0.471   | 0.6379  | (0.00,1.55) | 0.0520   |
| G-TF-CBT vs I-nTF-CBT vs NT vs TAU | 0.097 | 0.117   | 0.9071  | (0.00,1.72) | 0.0000   |

| Loop                       | IF    | z-value | P-value | 95%CI       | $\tau^2$ |
|----------------------------|-------|---------|---------|-------------|----------|
| G-TF-CBT vs I-TF-CBT vs WL | 0.090 | 0.246   | 0.8058  | (0.00,0.81) | 0.0480   |
| EMDR vs I-TF-CBT vs WL     | 0.053 | 0.118   | 0.9057  | (0.00,0.93) | 0.0000   |

BT= Behavioral therapy. CT= Cognitive therapy. EMDR= Eye movement desensitization and reprocessing. G-TF-CBT= Group trauma-focused cognitive behavioral therapy. I-TF-CBT= Individual trauma-focused cognitive behavioral therapy. I-nTF-CBT= Individual non-trauma-focused cognitive behavioral therapy. ST= Supportive therapy. TAU= Treatment as usual. WL= Waitlist.

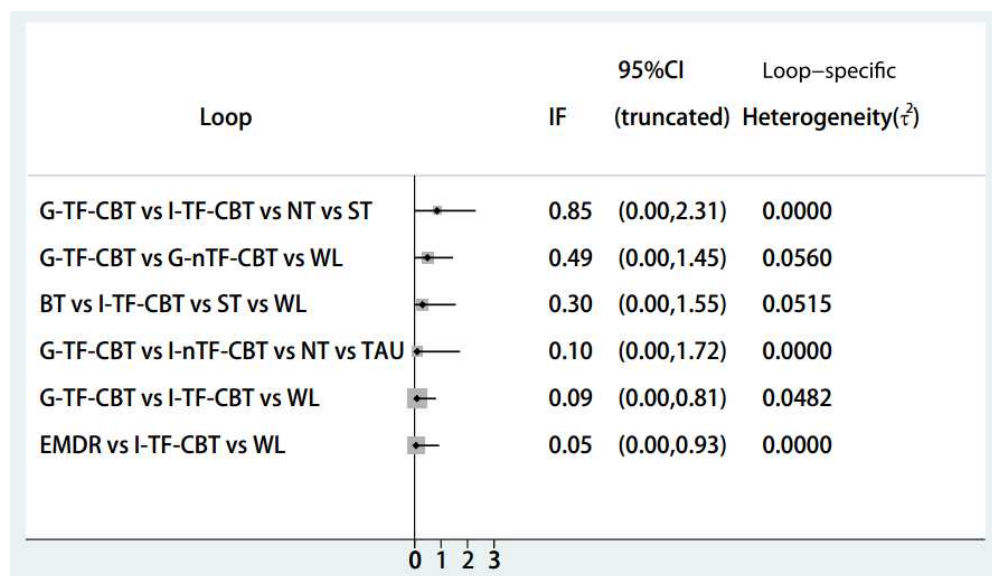

### (c) All-cause discontinuation

| Loop                               | ROR    | z-value | P-value | 95%CI          | $\tau^2$ |
|------------------------------------|--------|---------|---------|----------------|----------|
| EMDR vs G-TF-CBT vs NT vs TAU      | 45.636 | 1.797   | 0.0724  | (1.00,2947.53) | 0.0000   |
| EMDR vs I-nTF-CBT vs NT vs TAU     | 23.167 | 1.324   | 0.1856  | (1.00,2429.82) | 0.0000   |
| G-TF-CBT vs G-nTF-CBT vs WL        | 11.632 | 0.883   | 0.3771  | (1.00,2693.57) | 2.0398   |
| BT vs ST vs WL                     | 10.573 | 1.306   | 0.1917  | (1.00,364.37)  | 0.0000   |
| BT vs I-nTF-CBT vs ST vs TAU       | 10.311 | 1.378   | 0.1681  | (1.00,284.65)  | 0.0000   |
| EMDR vs EMDR vs TAU vs WL          | 10.021 | 0.767   | 0.4434  | (1.00,3632.76) | 2.3422   |
| EMDR vs I-TF-CBT vs TAU            | 8.758  | 1.384   | 0.1663  | (1.00,189.14)  | 0.0000   |
| BT vs EMDR vs TAU vs WL            | 8.066  | 0.591   | 0.5547  | (1.00,8215.58) | 1.4673   |
| G-TF-CBT vs I-TF-CBT vs NT         | 7.547  | 1.338   | 0.1809  | (1.00,145.72)  | 0.0000   |
| I-TF-CBT vs ST vs WL               | 5.613  | 1.700   | 0.0891  | (1.00,41.00)   | 0.3204   |
| BT vs I-TF-CBT vs ST vs TAU        | 4.440  | 0.931   | 0.3521  | (1.00,102.52)  | 0.1980   |
| I-nTF-CBT vs NT vs ST              | 3.328  | 0.455   | 0.6489  | (1.00,589.28)  | 0.0000   |
| EMDR vs G-TF-CBT vs NT vs WL       | 3.226  | 0.434   | 0.6644  | (1.00,640.81)  | 1.8266   |
| CT vs I-TF-CBT vs WL               | 3.074  | 0.747   | 0.4549  | (1.00,58.47)   | 0.0000   |
| EMDR vs I-TF-CBT vs WL             | 2.912  | 1.177   | 0.2391  | (1.00,17.27)   | 0.0000   |
| I-TF-CBT vs I-nTF-CBT vs NT        | 2.537  | 0.546   | 0.5849  | (1.00,71.56)   | 0.0000   |
| BT vs I-TF-CBT vs TAU vs WL        | 2.499  | 0.446   | 0.6560  | (1.00,140.57)  | 0.0000   |
| EMDR vs NT vs ST vs WL             | 2.285  | 0.275   | 0.7831  | (1.00,818.65)  | 1.4673   |
| I-TF-CBT vs I-nTF-CBT vs ST        | 2.067  | 0.413   | 0.6794  | (1.00,64.67)   | 0.5065   |
| G-TF-CBT vs I-nTF-CBT vs NT vs TAU | 1.970  | 0.303   | 0.7622  | (1.00,159.15)  | 0.0000   |
| I-TF-CBT vs TAU vs P-TF-CBT        | 1.620  | 0.398   | 0.6907  | (1.00,17.45)   | 0.0000   |
| G-TF-CBT vs I-TF-CBT vs TAU        | 1.543  | 0.314   | 0.7532  | (1.00,23.09)   | 0.0416   |
| G-TF-CBT vs NT vs ST vs WL         | 1.388  | 0.099   | 0.9208  | (1.00,897.16)  | 2.0398   |
| BT vs G-TF-CBT vs TAU vs WL        | 1.258  | 0.064   | 0.9488  | (1.00,1384.35) | 2.7382   |
| I-TF-CBT vs NT vs ST               | 1.113  | 0.037   | 0.9704  | (1.00,310.58)  | 0.5577   |

| Loop                         | ROR   | z-value | P-value | 95%CI        | $\tau^2$ |
|------------------------------|-------|---------|---------|--------------|----------|
| G-TF-CBT vs I-TF-CBT vs WL   | 1.113 | 0.076   | 0.9392  | (1.00,17.28) | 0.2936   |
| EMDR vs I-TF-CBT vs NT       | 1.111 | 0.113   | 0.9104  | (1.00,6.91)  | 0.0000   |
| I-TF-CBT vs I-nTF-CBT vs TAU | 1.002 | 0.002   | 0.9982  | (1.00,7.66)  | 0.0000   |

BT= Behavioral therapy. EMDR= Eye movement desensitization and reprocessing. G-TF-CBT= Group trauma-focused cognitive behavioral therapy. G-nTF-CBT= Group non-trauma-focused cognitive behavioral therapy. I-TF-CBT= Individual trauma-focused cognitive behavioral therapy. I-nTF-CBT= Individual non-trauma-focused cognitive behavioral therapy. NT= No treatment. P-TF-CBT = Parent-only trauma-focused cognitive behavioral therapy. ST= Supportive therapy. TAU= Treatment as usual. WL= Waitlist.

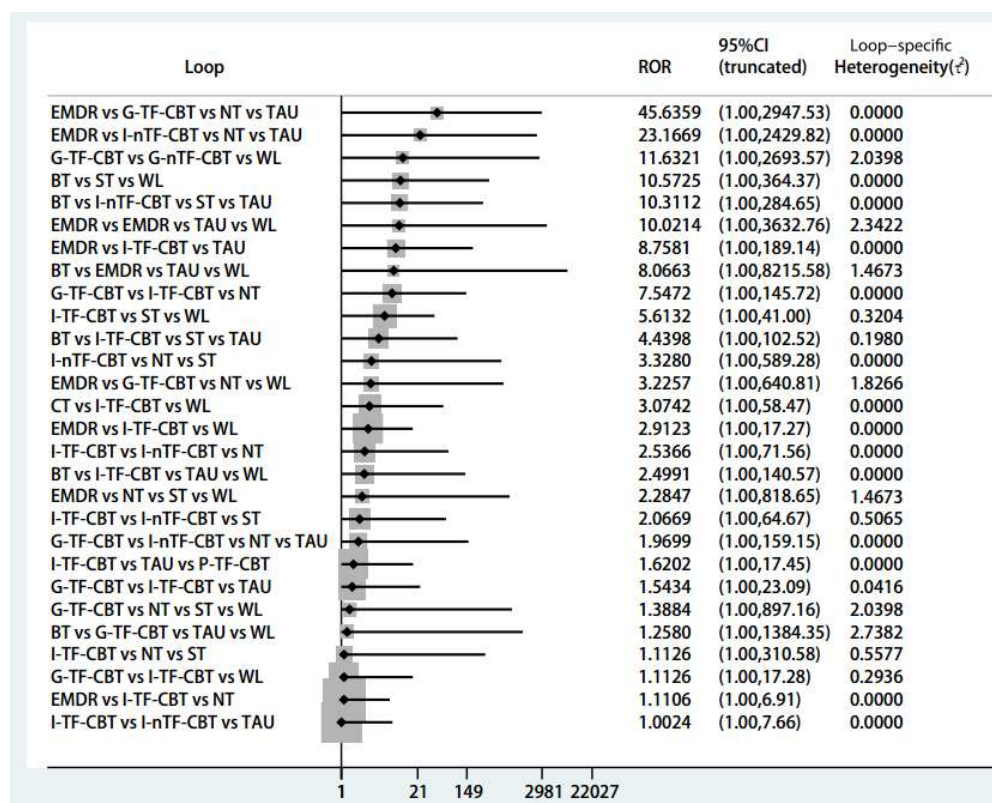

#### (d) Depressive symptoms

| Loop                                    | IF    | z-value | P-value | 95%CI       | $\tau^2$ |
|-----------------------------------------|-------|---------|---------|-------------|----------|
| BT vs I-nTF-CBT vs ST vs TAU            | 1.951 | 1.985   | 0.0471  | (0.02,3.88) | 0.1776   |
| BT vs I-TF-CBT vs ST vs TAU             | 1.204 | 1.898   | 0.0578  | (0.00,2.45) | 0.0473   |
| WL vs EMDR vs I-TF-CBT                  | 1.027 | 2.038   | 0.0416  | (0.04,2.01) | 0.1312   |
| G-TF-CBT vs I-TF-CBT vs I-nTF-CBT vs NT | 0.857 | 1.113   | 0.2659  | (0.00,2.37) | 0.0000   |
| G-TF-CBT vs I-nTF-CBT vs NT vs TAU      | 0.790 | 0.970   | 0.3321  | (0.00,2.39) | 0.0000   |
| EMDR vs I-TF-CBT vs TAU                 | 0.777 | 2.089   | 0.0367  | (0.05,1.51) | 0.0000   |
| G-TF-CBT vs I-TF-CBT vs NT vs ST        | 0.485 | 0.610   | 0.5417  | (0.00,2.04) | 0.0129   |
| G-TF-CBT vs I-TF-CBT vs TAU             | 0.425 | 1.043   | 0.2970  | (0.00,1.22) | 0.0000   |
| WL vs EMDR vs G-TF-CBT vs TAU           | 0.420 | 0.891   | 0.3729  | (0.00,1.34) | 0.0295   |
| I-TF-CBT vs P-TF-CBT vs TAU             | 0.396 | 0.839   | 0.4012  | (0.00,1.32) | 0.0000   |
| I-TF-CBT vs I-nTF-CBT vs TAU            | 0.358 | 0.725   | 0.4682  | (0.00,1.32) | 0.0000   |
| I-TF-CBT vs I-nTF-CBT vs ST             | 0.352 | 0.996   | 0.3192  | (0.00,1.04) | 0.0000   |
| WL vs CT vs I-TF-CBT                    | 0.129 | 0.157   | 0.8756  | (0.00,1.74) | 0.1757   |
| WL vs G-TF-CBT vs I-TF-CBT              | 0.101 | 0.220   | 0.8260  | (0.00,1.00) | 0.0786   |

| Loop                  | IF    | z-value | P-value | 95%CI       | $\tau^2$ |
|-----------------------|-------|---------|---------|-------------|----------|
| I-nTF-CBT vs NT vs ST | 0.024 | 0.035   | 0.9719  | (0.00,1.35) | 0.0000   |

BT= Behavioral therapy. CT= Cognitive therapy. EMDR= Eye movement desensitization and reprocessing. G-TF-CBT= Group trauma-focused cognitive behavioral therapy. I-TF-CBT= Individual trauma-focused cognitive behavioral therapy. I-nTF-CBT= Individual non-trauma-focused cognitive behavioral therapy. NT= No treatment. P-TF-CBT = Parent-only trauma-focused cognitive behavioral therapy. ST= Supportive therapy. TAU= Treatment as usual. WL= Waitlist.

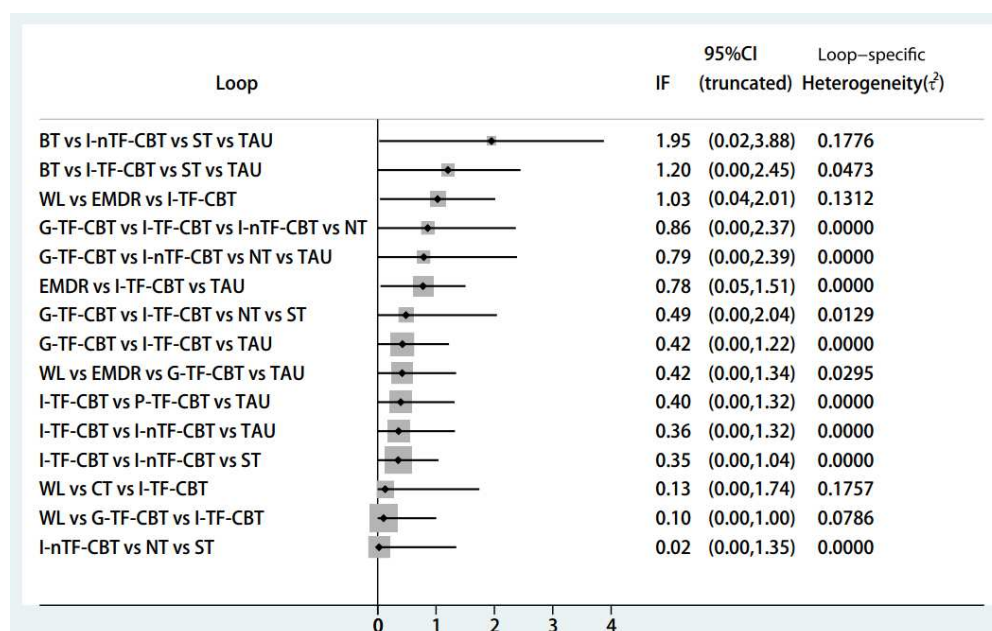

### (e) Anxiety symptoms

| Loop                        | IF    | z-value | P-value | 95%CI       | $\tau^2$ |
|-----------------------------|-------|---------|---------|-------------|----------|
| WL vs EMDR vs I-TF-CBT      | 1.221 | 2.274   | 0.0230  | (0.17,2.27) | 0.1589   |
| EMDR vs I-TF-CBT vs TAU     | 0.879 | 1.236   | 0.2166  | (0.00,2.27) | 0.1135   |
| WL vs CT vs I-TF-CBT        | 0.607 | 0.779   | 0.4359  | (0.00,2.13) | 0.1365   |
| I-TF-CBT vs I-nTF-CBT vs ST | 0.568 | 1.352   | 0.1763  | (0.00,1.39) | 0.0000   |
| I-TF-CBT vs P-TF-CBT vs TAU | 0.104 | 0.224   | 0.8232  | (0.00,1.02) | 0.0000   |
| WL vs I-TF-CBT vs ST        | 0.081 | 0.205   | 0.8375  | (0.00,0.86) | 0.0660   |

CT= Cognitive therapy. EMDR= Eye movement desensitization and reprocessing. I-TF-CBT= Individual trauma-focused cognitive behavioral therapy. I-nTF-CBT= Individual non-trauma-focused cognitive behavioral therapy. P-TF-CBT = Parent-only trauma-focused cognitive behavioral therapy. ST= Supportive therapy. TAU= Treatment as usual. WL= Waitlist.

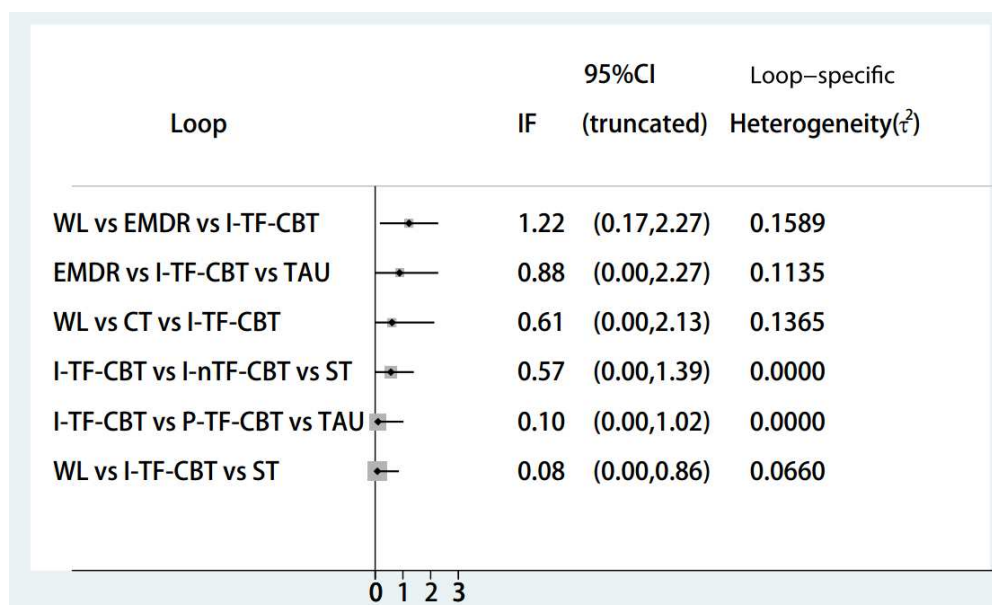

#### Evaluation of the incoherence by node-splitting model:

Tests of incoherence by node-splitting method fitted the node-splitting model of in the study: Dias S, Welton NJ, Caldwell DM, Ades AE. Checking consistency in mixed treatment comparison meta-analysis. *Stat Med.* 2010;29(7-8):932-944. The results reported the estimated direct and indirect treatment effects and their difference; the P-value for the difference is the test of incoherence.

#### (a) Efficacy at post-treatment

| Outcome               | k | prop | NMA     | direct  | indir.  | Diff    | z     | p-value |
|-----------------------|---|------|---------|---------|---------|---------|-------|---------|
| BT vs ST              | 2 | 0.61 | -0.7430 | -1.1144 | -0.1725 | -0.9419 | -1.65 | 0.0988  |
| BT vs TAU             | 1 | 0.33 | -0.8242 | -0.2533 | -1.1115 | 0.8583  | 1.33  | 0.1848  |
| BT vs WL              | 1 | 0.26 | -0.9643 | -0.6771 | -1.0653 | 0.3882  | 0.57  | 0.5673  |
| CT vs I-TF-CBT        | 1 | 0.57 | -0.2204 | -0.0022 | -0.5082 | 0.5060  | 0.62  | 0.5380  |
| CT vs WL              | 1 | 0.46 | -1.0243 | -1.2953 | -0.7893 | -0.5060 | -0.62 | 0.5380  |
| EMDR vs I-TF-CBT      | 4 | 0.56 | 0.2048  | -0.1689 | 0.6726  | -0.8416 | -2.15 | 0.0317  |
| EMDR vs NT            | 1 | 0.38 | -0.6968 | -0.8241 | -0.6191 | -0.2049 | -0.33 | 0.7390  |
| EMDR vs TAU           | 1 | 0.24 | -0.4590 | 0.0386  | -0.6194 | 0.6581  | 1.21  | 0.2264  |
| EMDR vs WL            | 4 | 0.53 | -0.5991 | -0.4219 | -0.8019 | 0.3800  | 0.96  | 0.3384  |
| G-nTF-CBT vs G-TF-CBT | 1 | 0.52 | -0.4255 | -0.2288 | -0.6407 | 0.4119  | 0.59  | 0.5535  |
| G-nTF-CBT vs WL       | 1 | 0.53 | -0.9205 | -1.1161 | -0.7042 | -0.4119 | -0.59 | 0.5535  |
| G-TF-CBT vs I-TF-CBT  | 1 | 0.12 | 0.3089  | 0.2289  | 0.3202  | -0.0913 | -0.17 | 0.8667  |
| G-TF-CBT vs NT        | 2 | 0.46 | -0.5928 | -0.7868 | -0.4279 | -0.3589 | -0.65 | 0.5145  |
| G-TF-CBT vs TAU       | 2 | 0.43 | -0.3549 | -0.4783 | -0.2612 | -0.2171 | -0.52 | 0.6015  |
| G-TF-CBT vs WL        | 7 | 0.71 | -0.4951 | -0.3833 | -0.7661 | 0.3828  | 1.17  | 0.2403  |
| I-nTF-CBT vs I-TF-CBT | 1 | 0.34 | 0.3002  | 0.1064  | 0.4007  | -0.2943 | -0.51 | 0.6110  |
| I-nTF-CBT vs NT       | 1 | 0.34 | -0.6014 | -0.4686 | -0.6698 | 0.2012  | 0.27  | 0.7850  |
| I-nTF-CBT vs ST       | 2 | 0.52 | -0.2825 | 0.0157  | -0.6028 | 0.6185  | 1.10  | 0.2718  |
| I-nTF-CBT vs TAU      | 1 | 0.26 | -0.3636 | -0.8189 | -0.2002 | -0.6188 | -0.91 | 0.3624  |
| I-TF-CBT vs NT        | 1 | 0.32 | -0.9017 | -0.5654 | -1.0603 | 0.4949  | 0.85  | 0.3957  |
| I-TF-CBT vs P-TF-CBT  | 1 | 0.82 | -0.2587 | -0.3504 | 0.1706  | -0.5210 | -0.45 | 0.6539  |
| I-TF-CBT vs ST        | 5 | 0.66 | -0.5827 | -0.6240 | -0.5039 | -0.1201 | -0.33 | 0.7421  |
| I-TF-CBT vs TAU       | 4 | 0.53 | -0.6638 | -0.7666 | -0.5476 | -0.2190 | -0.61 | 0.5441  |
| I-TF-CBT vs WL        | 7 | 0.55 | -0.8039 | -0.9174 | -0.6679 | -0.2495 | -0.84 | 0.3993  |
| NT vs ST              | 1 | 0.25 | 0.3190  | 0.1647  | 0.3705  | -0.2058 | -0.30 | 0.7644  |
| P-TF-CBT vs TAU       | 1 | 0.76 | -0.4051 | -0.5190 | -0.0531 | -0.4659 | -0.45 | 0.6539  |

| Outcome  | k | prop | NMA     | direct  | indir.  | Diff    | z     | p-value |
|----------|---|------|---------|---------|---------|---------|-------|---------|
| ST vs WL | 1 | 0.19 | -0.2212 | -0.6756 | -0.1118 | -0.5637 | -1.09 | 0.2743  |

Random effects model was used. k - Number of studies providing direct evidence; prop - Direct evidence proportion; NMA - Estimated treatment effect (MD) in network meta-analysis; direct - Estimated treatment effect (MD) derived from direct evidence; indir. - Estimated treatment effect (MD) derived from indirect evidence; Diff - Difference between direct and indirect treatment estimates; z - z-value of test for disagreement (direct versus indirect); p-value - p-value of test for disagreement (direct versus indirect).

BT= Behavioral therapy. CT= Cognitive therapy. EMDR= Eye movement desensitization and reprocessing. G-TF-CBT= Group trauma-focused cognitive behavioral therapy. G-nTF-CBT= Group non-trauma-focused cognitive behavioral therapy. I-TF-CBT= Individual trauma-focused cognitive behavioral therapy. I-nTF-CBT= Individual non-trauma-focused cognitive behavioral therapy. NT= No treatment. P-TF-CBT = Parent-only trauma-focused cognitive behavioral therapy. ST= Supportive therapy. TAU= Treatment as usual. WL= Waitlist.



**(b) Efficacy at follow-up**

| Outcome               | k | prop | NMA     | direct  | indir.  | Diff    | z     | p-value |
|-----------------------|---|------|---------|---------|---------|---------|-------|---------|
| BT vs ST              | 2 | 0.82 | -1.1740 | -1.2024 | -1.0462 | -0.1562 | -0.28 | 0.7821  |
| BT vs WL              | 1 | 0.33 | -1.1000 | -0.9957 | -1.1520 | 0.1562  | 0.28  | 0.7821  |
| EMDR vs I-TF-CBT      | 1 | 0.70 | -0.1200 | -0.1199 | -0.1203 | 0.0004  | 0.00  | 0.9993  |
| EMDR vs WL            | 1 | 0.38 | -0.5318 | -0.5320 | -0.5316 | -0.0004 | 0.00  | 0.9993  |
| G-nTF-CBT vs G-TF-CBT | 1 | 0.49 | 0.0226  | -0.2342 | 0.2723  | -0.5065 | -1.19 | 0.2354  |
| G-nTF-CBT vs WL       | 1 | 0.55 | -0.2256 | 0.0000  | -0.5065 | 0.5065  | 1.19  | 0.2354  |
| G-TF-CBT vs I-TF-CBT  | 2 | 0.38 | 0.1636  | 0.1727  | 0.1580  | 0.0147  | 0.05  | 0.9621  |
| G-TF-CBT vs NT        | 1 | 0.39 | -0.8211 | -1.1467 | -0.6135 | -0.5331 | -0.72 | 0.4708  |
| G-TF-CBT vs TAU       | 1 | 0.91 | -0.5037 | -0.5328 | -0.2199 | -0.3130 | -0.51 | 0.6131  |
| G-TF-CBT vs WL        | 7 | 0.85 | -0.2482 | -0.2593 | -0.1859 | -0.0734 | -0.29 | 0.7724  |
| I-nTF-CBT vs NT       | 1 | 0.69 | -0.9007 | -0.9485 | -0.7939 | -0.1546 | -0.18 | 0.8600  |
| I-nTF-CBT vs ST       | 1 | 0.51 | -0.4018 | -0.7750 | -0.0095 | -0.7655 | -1.07 | 0.2830  |
| I-nTF-CBT vs TAU      | 1 | 0.61 | -0.5833 | -0.3829 | -0.8912 | 0.5083  | 0.74  | 0.4607  |
| I-TF-CBT vs ST        | 3 | 0.84 | -0.4858 | -0.4032 | -0.9062 | 0.5030  | 1.13  | 0.2587  |
| I-TF-CBT vs TAU       | 1 | 0.03 | -0.6673 | -1.0457 | -0.6538 | -0.3919 | -0.32 | 0.7528  |
| I-TF-CBT vs WL        | 2 | 0.50 | -0.4117 | -0.4997 | -0.3238 | -0.1758 | -0.61 | 0.5408  |
| NT vs ST              | 1 | 0.61 | 0.4989  | 0.1700  | 1.0197  | -0.8496 | -1.14 | 0.2524  |

Random effects model was used. k - Number of studies providing direct evidence; prop - Direct evidence proportion; NMA - Estimated treatment effect (MD) in network meta-analysis; direct - Estimated treatment effect (MD) derived from direct evidence; indir. - Estimated treatment effect (MD) derived from indirect evidence; Diff - Difference between direct and indirect treatment estimates; z - z-value of test for disagreement (direct versus indirect); p-value - p-value of test for disagreement (direct versus indirect).

BT= Behavioral therapy. EMDR= Eye movement desensitization and reprocessing. G-TF-CBT= Group trauma-focused cognitive behavioral therapy. G-nTF-CBT= Group non-trauma-focused cognitive behavioral therapy. I-TF-CBT= Individual trauma-focused cognitive behavioral therapy. I-nTF-CBT= Individual non-trauma-focused cognitive behavioral therapy. NT= No treatment. ST= Supportive therapy. TAU= Treatment as usual. WL= Waitlist.

## (c) All-cause discontinuation

| Outcome               | k | prop | NMA    | direct  | indir.  | Diff    | z     | p-value |
|-----------------------|---|------|--------|---------|---------|---------|-------|---------|
| BT vs ST              | 2 | 0.75 | 1.3083 | 0.8759  | 4.4912  | 0.1950  | -1.35 | 0.1777  |
| BT vs TAU             | 1 | 0.25 | 1.5469 | 5.2174  | 1.0357  | 5.0376  | 1.16  | 0.2467  |
| BT vs WL              | 1 | 0.12 | 1.3817 | 3.2400  | 1.2334  | 2.6268  | 0.52  | 0.6020  |
| CT vs I-TF-CBT        | 1 | 0.73 | 0.8257 | 1.0000  | 0.4920  | 2.0323  | 0.43  | 0.6641  |
| CT vs WL              | 1 | 0.30 | 0.8197 | 0.5000  | 1.0162  | 0.4920  | -0.43 | 0.6641  |
| EMDR vs I-TF-CBT      | 4 | 0.77 | 1.1826 | 1.1613  | 1.2563  | 0.9244  | -0.08 | 0.9324  |
| EMDR vs NT            | 1 | 0.67 | 7.6851 | 5.8889  | 13.1618 | 0.4474  | -0.66 | 0.5106  |
| EMDR vs TAU           | 1 | 0.09 | 1.3143 | 10.0746 | 1.0673  | 9.4392  | 1.36  | 0.1749  |
| EMDR vs WL            | 3 | 0.29 | 1.1740 | 0.7104  | 1.4465  | 0.4911  | -0.73 | 0.4681  |
| G-nTF-CBT vs G-TF-CBT | 1 | 0.53 | 1.1404 | 0.3542  | 4.2930  | 0.0825  | -1.35 | 0.1768  |
| G-nTF-CBT vs WL       | 1 | 0.53 | 0.9875 | 3.1579  | 0.2605  | 12.1214 | 1.35  | 0.1768  |
| G-TF-CBT vs I-TF-CBT  | 1 | 0.20 | 0.8723 | 0.4615  | 1.0272  | 0.4493  | -0.70 | 0.4831  |
| G-TF-CBT vs NT        | 2 | 0.37 | 5.6684 | 9.3034  | 4.2588  | 2.1845  | 0.61  | 0.5425  |
| G-TF-CBT vs TAU       | 2 | 0.29 | 0.9694 | 0.7353  | 1.0829  | 0.6791  | -0.34 | 0.7312  |
| G-TF-CBT vs WL        | 6 | 0.49 | 0.8659 | 0.7657  | 0.9722  | 0.7875  | -0.26 | 0.7937  |
| I-nTF-CBT vs I-TF-CBT | 1 | 0.46 | 1.3516 | 1.1512  | 1.5487  | 0.7433  | -0.31 | 0.7545  |
| I-nTF-CBT vs NT       | 1 | 0.19 | 8.7837 | 15.4762 | 7.7190  | 2.0050  | 0.39  | 0.6934  |
| I-nTF-CBT vs ST       | 2 | 0.38 | 1.2706 | 1.8251  | 1.0212  | 1.7872  | 0.56  | 0.5753  |
| I-nTF-CBT vs TAU      | 1 | 0.29 | 1.5022 | 1.1429  | 1.6768  | 0.6816  | -0.33 | 0.7389  |
| I-TF-CBT vs NT        | 1 | 0.58 | 6.4986 | 5.3000  | 8.6273  | 0.6143  | -0.45 | 0.6549  |
| I-TF-CBT vs P-TF-CBT  | 1 | 0.83 | 0.8131 | 0.6377  | 2.6584  | 0.2399  | -0.64 | 0.5243  |
| I-TF-CBT vs ST        | 4 | 0.71 | 0.9400 | 0.7288  | 1.7385  | 0.4192  | -1.40 | 0.1603  |
| I-TF-CBT vs TAU       | 4 | 0.76 | 1.1114 | 0.9753  | 1.6931  | 0.5761  | -0.76 | 0.4456  |
| I-TF-CBT vs WL        | 7 | 0.59 | 0.9927 | 1.4493  | 0.5709  | 2.5387  | 1.57  | 0.1165  |
| NT vs ST              | 1 | 0.13 | 0.1447 | 0.1680  | 0.1416  | 1.1867  | 0.10  | 0.9235  |
| P-TF-CBT vs TAU       | 1 | 0.75 | 1.3669 | 1.0000  | 3.4869  | 0.2868  | -0.64 | 0.5243  |
| ST vs WL              | 1 | 0.33 | 1.0560 | 0.3431  | 1.8203  | 0.1885  | -2.19 | 0.0282  |

Random effects model was used. k - Number of studies providing direct evidence; prop - Direct evidence proportion; NMA - Estimated treatment effect (MD) in network meta-analysis; direct - Estimated treatment effect (MD) derived from direct evidence; indir. - Estimated treatment effect (MD) derived from indirect evidence; Diff - Difference between direct and indirect treatment estimates; z - z-value of test for disagreement (direct versus indirect); p-value - p-value of test for disagreement (direct versus indirect).

BT= Behavioral therapy. CT= Cognitive therapy. EMDR= Eye movement desensitization and reprocessing. G-TF-CBT= Group trauma-focused cognitive behavioral therapy. G-nTF-CBT= Group non-trauma-focused cognitive behavioral therapy. I-TF-CBT= Individual trauma-focused cognitive behavioral therapy. I-nTF-CBT= Individual non-trauma-focused cognitive behavioral therapy. NT= No treatment. P-TF-CBT = Parent-only trauma-focused cognitive behavioral therapy. ST= Supportive therapy. TAU= Treatment as usual. WL= Waitlist.

**(d) Depressive symptoms**

| Outcome               | k | prop | NMA     | direct  | indir.  | Diff    | z     | p-value |
|-----------------------|---|------|---------|---------|---------|---------|-------|---------|
| BT vs ST              | 2 | 0.79 | -0.6862 | -0.9763 | 0.3954  | -1.3717 | -2.25 | 0.0244  |
| BT vs TAU             | 1 | 0.36 | -0.7631 | 0.1127  | -1.2590 | 1.3717  | 2.25  | 0.0244  |
| CT vs I-TF-CBT        | 1 | 0.57 | -0.0942 | 0.0072  | -0.2280 | 0.2352  | 0.35  | 0.7270  |
| CT vs WL              | 1 | 0.47 | -0.6120 | -0.7367 | -0.5014 | -0.2352 | -0.35 | 0.7270  |
| EMDR vs I-TF-CBT      | 2 | 0.45 | 0.0622  | -0.4726 | 0.5035  | -0.9760 | -2.46 | 0.0140  |
| EMDR vs TAU           | 1 | 0.39 | -0.4723 | -0.1498 | -0.6749 | 0.5251  | 1.15  | 0.2515  |
| EMDR vs WL            | 3 | 0.60 | -0.4556 | -0.2920 | -0.7058 | 0.4138  | 1.02  | 0.3057  |
| G-TF-CBT vs I-TF-CBT  | 1 | 0.16 | 0.2312  | 0.3045  | 0.2176  | 0.0869  | 0.20  | 0.8440  |
| G-TF-CBT vs NT        | 1 | 0.41 | -0.3414 | -0.6412 | -0.1317 | -0.5094 | -0.67 | 0.5037  |
| G-TF-CBT vs TAU       | 1 | 0.33 | -0.3033 | -0.6362 | -0.1387 | -0.4975 | -1.15 | 0.2492  |
| G-TF-CBT vs WL        | 6 | 0.83 | -0.2866 | -0.2295 | -0.5655 | 0.3360  | 1.02  | 0.3073  |
| I-nTF-CBT vs I-TF-CBT | 1 | 0.40 | 0.3815  | 0.2270  | 0.4844  | -0.2573 | -0.56 | 0.5778  |
| I-nTF-CBT vs NT       | 1 | 0.56 | -0.1911 | 0.1125  | -0.5811 | 0.6936  | 0.90  | 0.3665  |
| I-nTF-CBT vs ST       | 2 | 0.52 | -0.0760 | 0.2100  | -0.3910 | 0.6009  | 1.29  | 0.1957  |
| I-nTF-CBT vs TAU      | 1 | 0.28 | -0.1530 | -0.6350 | 0.0322  | -0.6672 | -1.16 | 0.2455  |
| I-TF-CBT vs P-TF-CBT  | 1 | 0.86 | -0.1429 | -0.2263 | 0.3851  | -0.6114 | -0.60 | 0.5492  |
| I-TF-CBT vs ST        | 4 | 0.78 | -0.4575 | -0.4147 | -0.6129 | 0.1981  | 0.52  | 0.6057  |
| I-TF-CBT vs TAU       | 2 | 0.48 | -0.5345 | -0.6292 | -0.4466 | -0.1826 | -0.53 | 0.5990  |
| I-TF-CBT vs WL        | 7 | 0.71 | -0.5178 | -0.6321 | -0.2328 | -0.3993 | -1.39 | 0.1660  |
| NT vs ST              | 1 | 0.53 | 0.1151  | 0.0865  | 0.1473  | -0.0608 | -0.08 | 0.9346  |
| P-TF-CBT vs TAU       | 1 | 0.76 | -0.3916 | -0.5121 | -0.0100 | -0.5022 | -0.60 | 0.5492  |

\*All the evidence about these contrasts comes from the trials which directly compare them. Random effects model was used. k - Number of studies providing direct evidence; prop - Direct evidence proportion; NMA - Estimated treatment effect (MD) in network meta-analysis; direct - Estimated treatment effect (MD) derived from direct evidence; indir. - Estimated treatment effect (MD) derived from indirect evidence; Diff - Difference between direct and indirect treatment estimates; z - z-value of test for disagreement (direct versus indirect); p-value - p-value of test for disagreement (direct versus indirect).

BT= Behavioral therapy. CT= Cognitive therapy. EMDR= Eye movement desensitization and reprocessing. G-TF-CBT= Group trauma-focused cognitive behavioral therapy. I-TF-CBT= Individual trauma-focused cognitive behavioral therapy. I-nTF-CBT= Individual non-trauma-focused cognitive behavioral therapy. NT= No treatment. P-TF-CBT = Parent-only trauma-focused cognitive behavioral therapy. ST= Supportive therapy. TAU= Treatment as usual. WL= Waitlist.

## (e) Anxiety symptoms

| Outcome               | k | prop | NMA     | direct  | indir.  | Diff    | z     | p-value |
|-----------------------|---|------|---------|---------|---------|---------|-------|---------|
| CT vs I-TF-CBT        | 1 | 0.59 | -0.1958 | 0.0806  | -0.5890 | 0.6696  | 1.03  | 0.3018  |
| CT vs WL              | 1 | 0.45 | -0.6876 | -1.0558 | -0.3862 | -0.6696 | -1.03 | 0.3018  |
| EMDR vs I-TF-CBT      | 2 | 0.46 | -0.0188 | -0.6030 | 0.4701  | -1.0731 | -2.88 | 0.0040  |
| EMDR vs TAU           | 1 | 0.47 | -0.2660 | -0.0460 | -0.4627 | 0.4167  | 0.93  | 0.3530  |
| EMDR vs WL            | 3 | 0.63 | -0.5106 | -0.2460 | -0.9577 | 0.7117  | 1.82  | 0.0689  |
| I-nTF-CBT vs I-TF-CBT | 1 | 0.55 | 0.4165  | 0.6758  | 0.0995  | 0.5764  | 1.07  | 0.2853  |
| I-nTF-CBT vs ST       | 1 | 0.52 | 0.1034  | -0.1759 | 0.4004  | -0.5764 | -1.07 | 0.2853  |
| I-TF-CBT vs P-TF-CBT  | 1 | 0.89 | -0.1421 | -0.2143 | 0.4342  | -0.6485 | -0.63 | 0.5319  |
| I-TF-CBT vs ST        | 4 | 0.78 | -0.3131 | -0.2725 | -0.4537 | 0.1812  | 0.57  | 0.5711  |
| I-TF-CBT vs TAU       | 2 | 0.75 | -0.2472 | -0.3525 | 0.0649  | -0.4174 | -0.93 | 0.3522  |
| I-TF-CBT vs WL        | 7 | 0.76 | -0.4918 | -0.5394 | -0.3437 | -0.1956 | -0.68 | 0.4939  |
| P-TF-CBT vs TAU       | 1 | 0.79 | -0.1051 | -0.2129 | 0.3080  | -0.5208 | -0.63 | 0.5319  |
| ST vs WL              | 1 | 0.29 | -0.1787 | -0.1986 | -0.1706 | -0.0280 | -0.08 | 0.9389  |

\*All the evidence about these contrasts comes from the trials which directly compare them.

Random effects model was used. k - Number of studies providing direct evidence; prop - Direct evidence proportion; NMA - Estimated treatment effect (MD) in network meta-analysis; direct - Estimated treatment effect (MD) derived from direct evidence; indir. - Estimated treatment effect (MD) derived from indirect evidence; Diff - Difference between direct and indirect treatment estimates; z - z-value of test for disagreement (direct versus indirect); p-value - p-value of test for disagreement (direct versus indirect).

CT= Cognitive therapy. EMDR= Eye movement desensitization and reprocessing. I-TF-CBT= Individual trauma-focused cognitive behavioral therapy. I-nTF-CBT= Individual non-trauma-focused cognitive behavioral therapy. P-TF-CBT = Parent-only trauma-focused cognitive behavioral therapy. ST= Supportive therapy. TAU= Treatment as usual. WL= Waitlist.

**eAppendix 12. Assessment of transitivity**

**1. Publication Year**

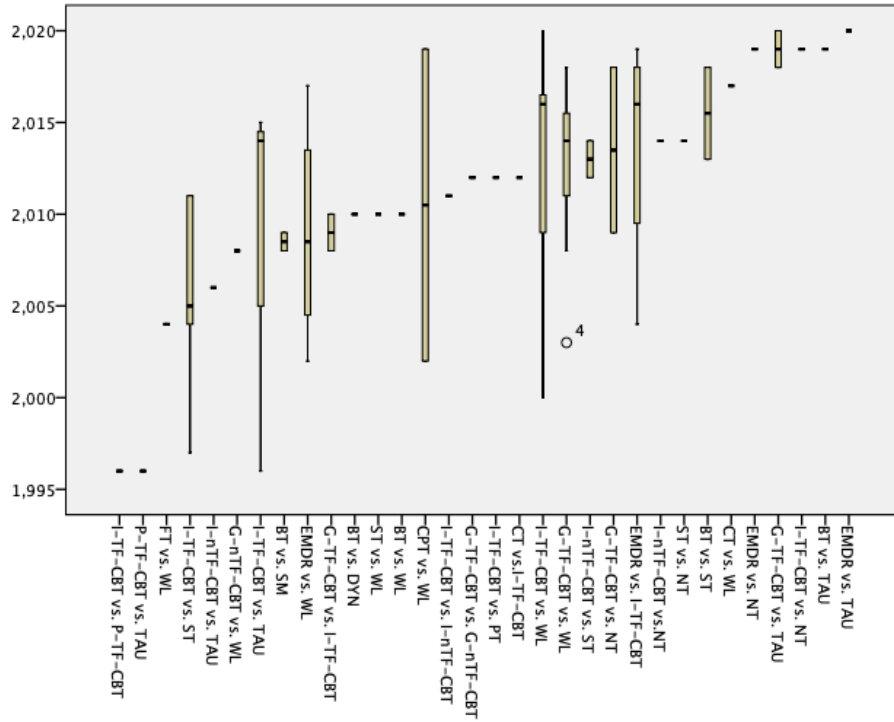

**2. Mean age**

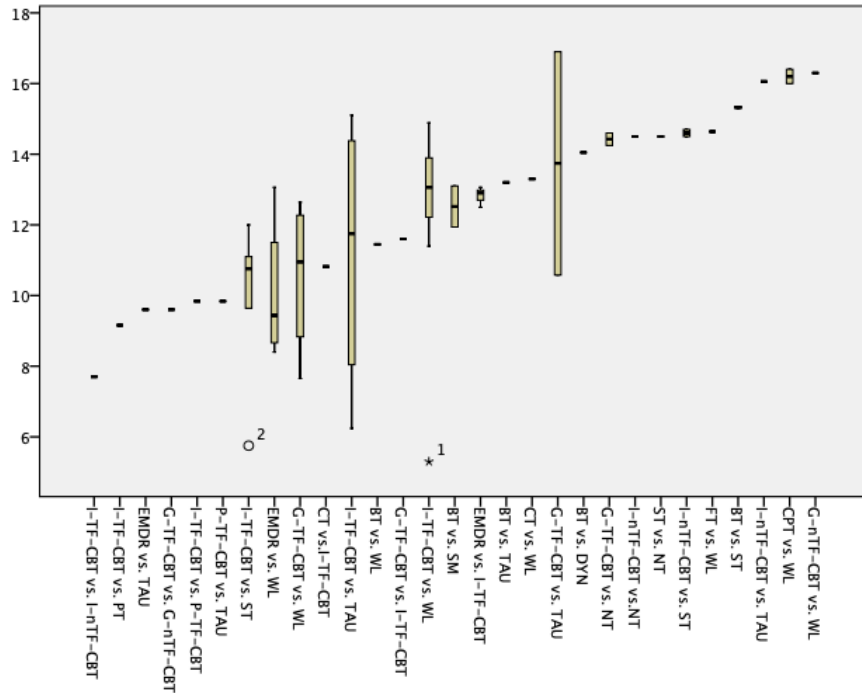

3. Gender (Female %)

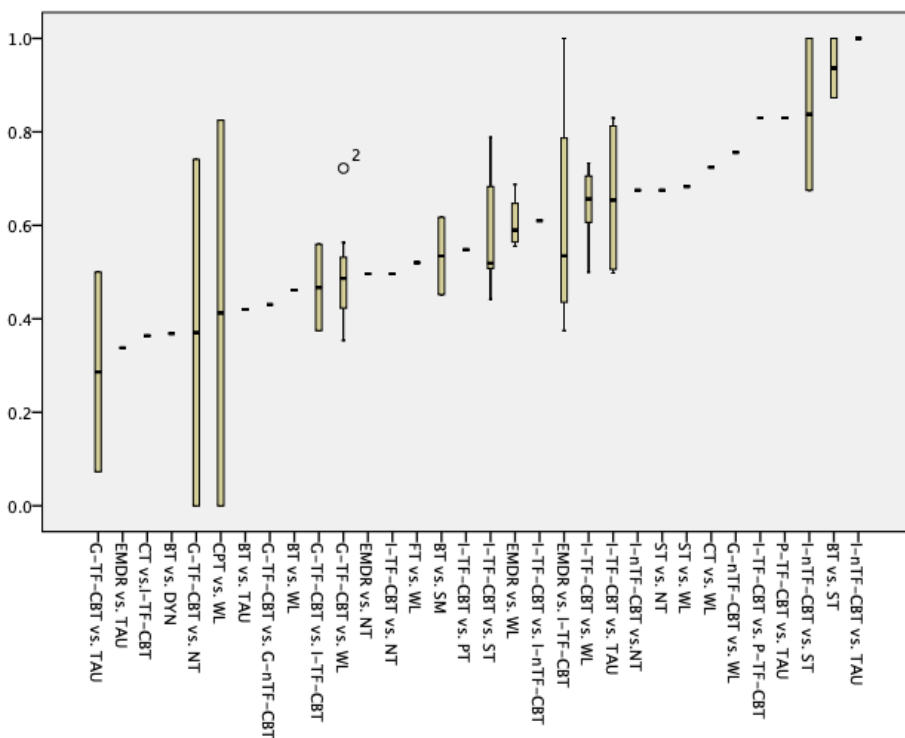

4. Sample size

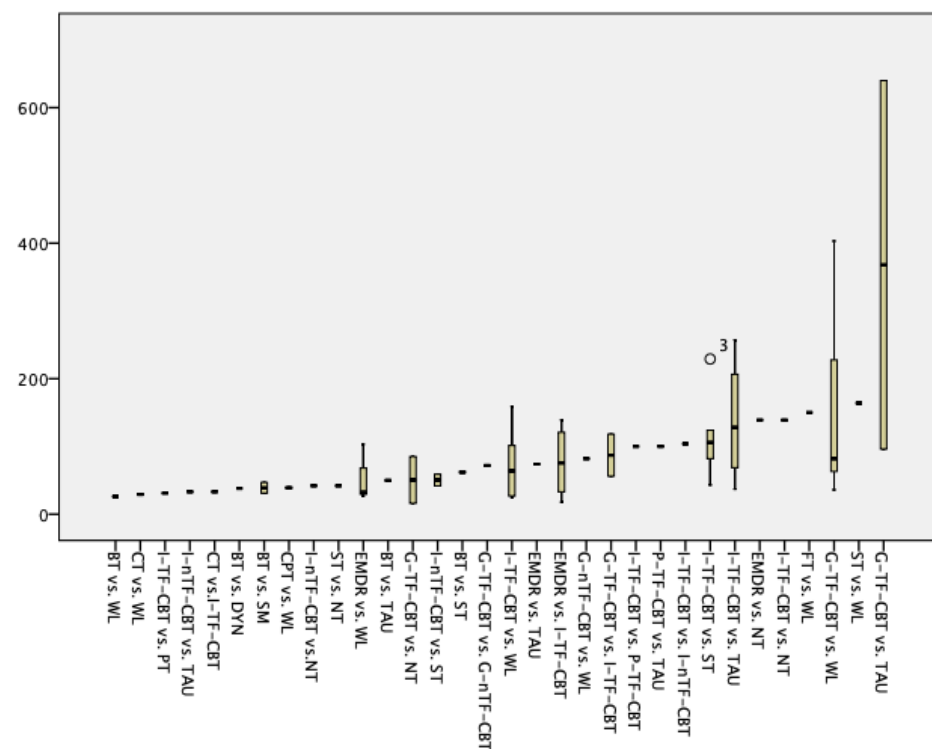

5. Number of treatment session

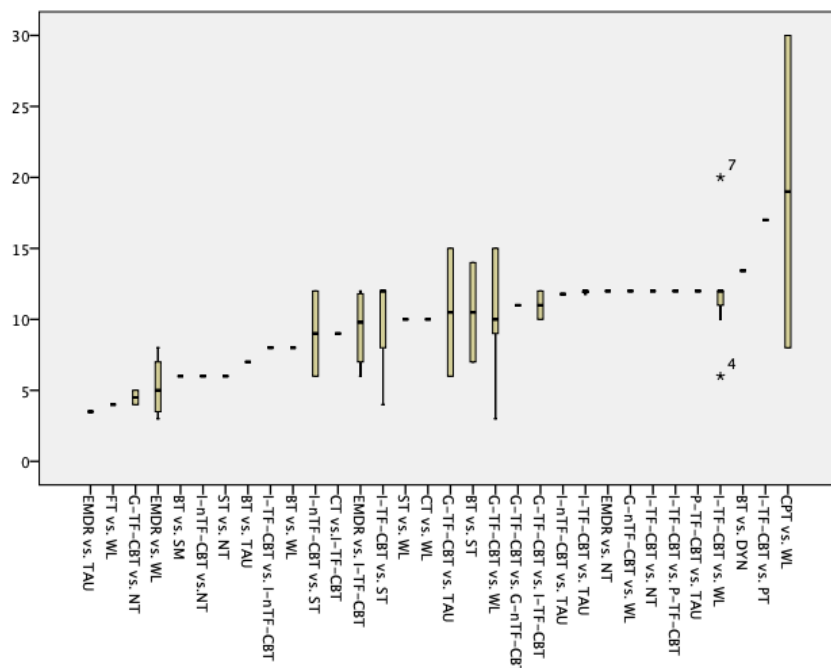

### eAppendix 13. Comparison-adjusted funnel plot for each outcome from the network meta-analysis

The comparison-adjusted funnel plot was conducted to assess small-study effects within network meta-analysis. All the active treatments vs. control conditions (NT, TAU, WL) in our network were shown in the comparison-adjusted funnel plot. Each node showed the specific comparisons from the comparison-adjusted funnel plot, respectively. The comparison-adjusted funnel plots of the network meta-analysis did't show obvious publication bias for all outcomes. The value of Egger's test is showed in the bottom of the comparison-adjusted funnel plot.

#### a. Comparison-adjusted funnel plot for efficacy at post-treatment

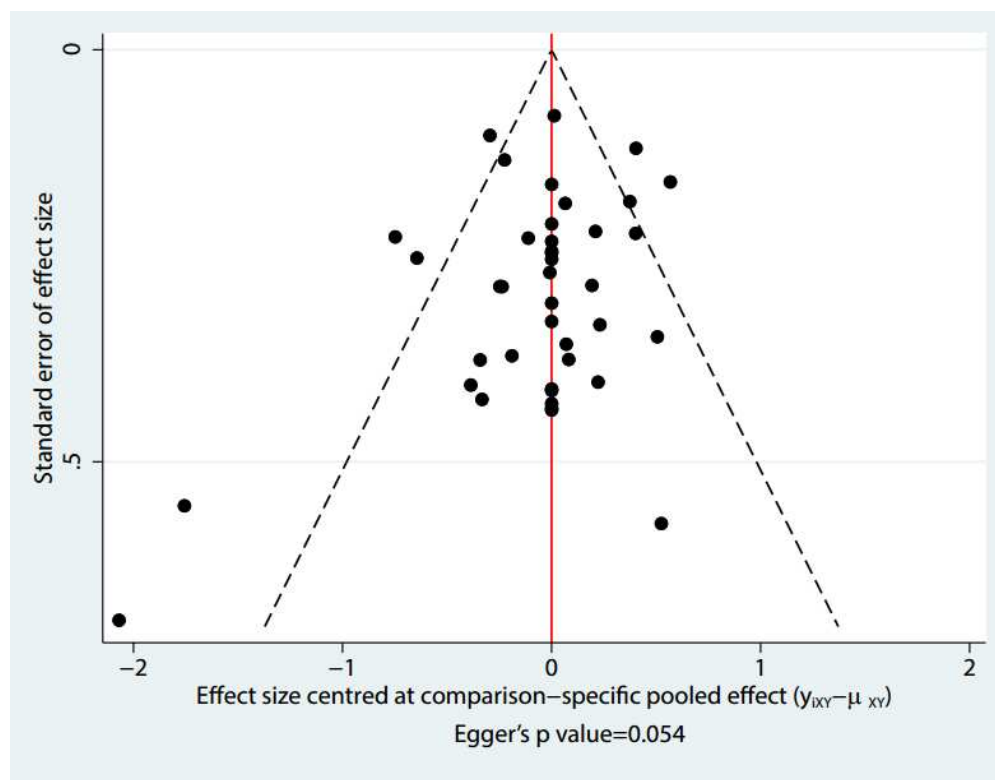



**b. Comparison-adjusted funnel plot for efficacy at follow-up**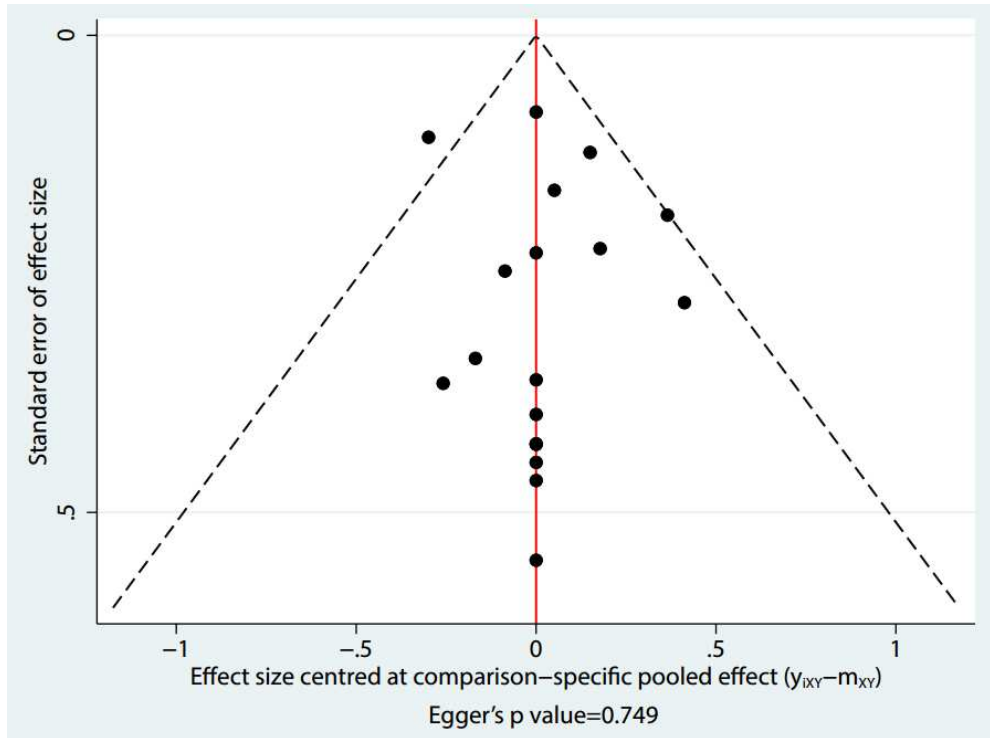

**c. Comparison-adjusted funnel plot for all-cause discontinuation**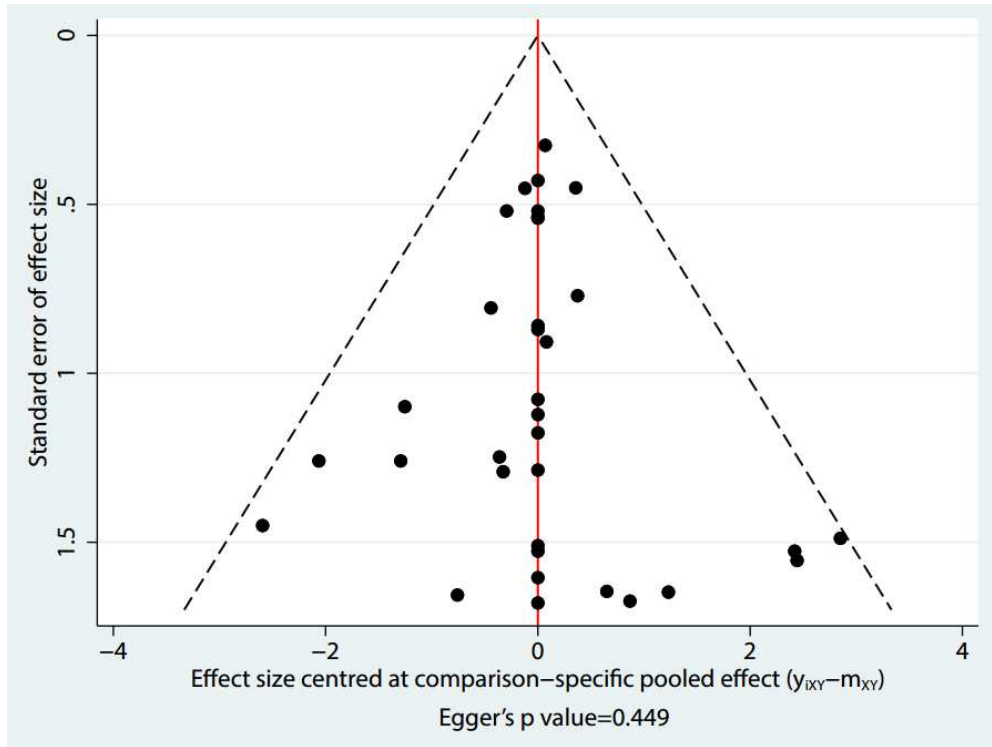

**d. Comparison-adjusted funnel plot for depressive symptoms**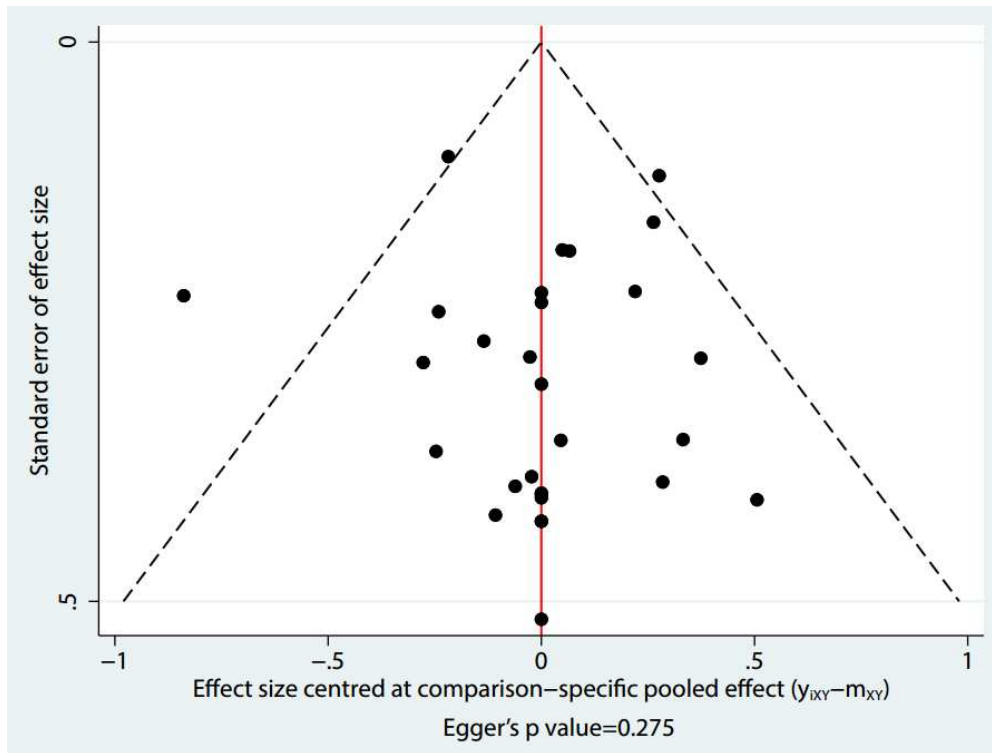

## e. Comparison-adjusted funnel plot for anxiety symptoms

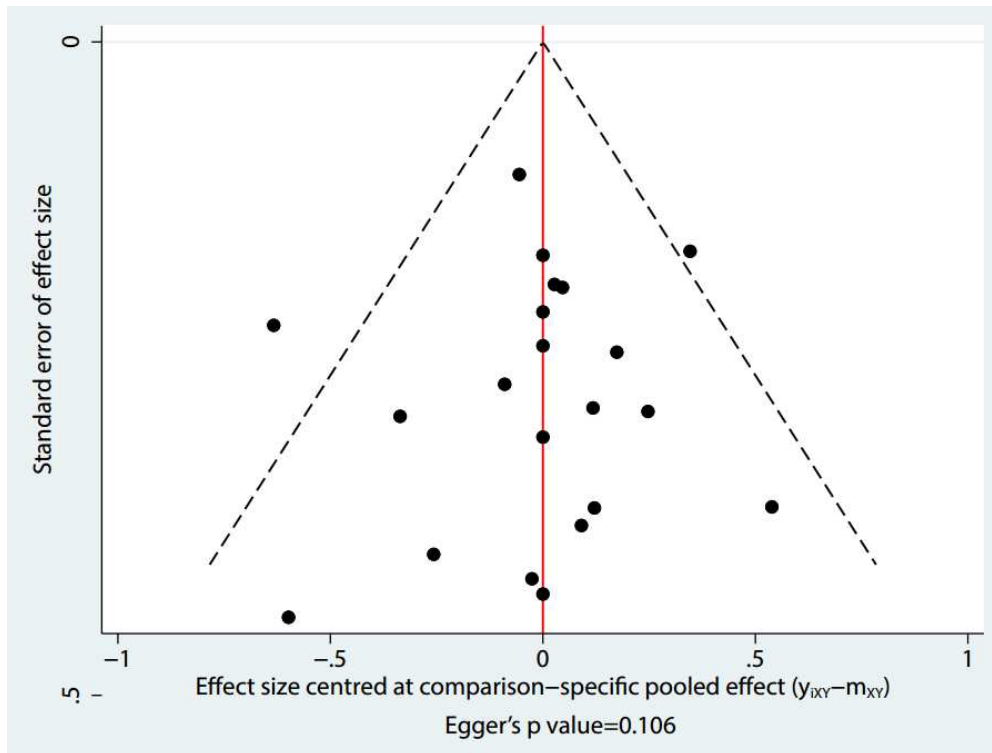

## eAppendix 14. Network meta-regression and sensitivity analyses for each outcome

### Summary of the network meta-regression and sensitivity analyses

We conducted network meta-regression and sensitivity analyses to estimate the impact of variable for each outcome.

The potential modifiers for network meta-regression we choose are listed below:

| Continuous variable                       | Efficacy at post-treatment | Efficacy at follow-up | All-caused discontinuation | Depressive symptoms | Anxiety symptoms |
|-------------------------------------------|----------------------------|-----------------------|----------------------------|---------------------|------------------|
| Publication year                          | √                          | √                     | √                          | √                   | √                |
| Mean age of participants                  | √                          | √                     | √                          | √                   | √                |
| Gender (% female)                         | √                          | √                     | √                          | √                   | √                |
| Sample size of trials                     | √                          | √                     | √                          | √                   | √                |
| Treatment session                         | √                          | √                     | √                          | √                   | √                |
| Treatment duration                        | √                          | √                     | √                          | √                   | √                |
| Followup duration*                        | ×                          | √                     | ×                          | ×                   | ×                |
| Mean baseline severity of PTSD            | √                          | √                     | √                          | √                   | √                |
| Risk of bias rating of trials             | √                          | √                     | √                          | √                   | √                |
| Dichotomous variable                      | Efficacy at post-treatment | Efficacy at follow-up | All-caused discontinuation | Depressive symptoms | Anxiety symptoms |
| Trauma types                              | √                          | √                     | √                          | √                   | √                |
| Diagnosis criteria of PTSD                | √                          | √                     | √                          | √                   | √                |
| Self-rating or other-rating scales        | √                          | √                     | √                          | √                   | √                |
| With or without psychiatric comorbidities | √                          | √                     | √                          | √                   | √                |

\*We did not perform meta-regression analysis with followup duration for efficacy at post-treatment, all-caused discontinuation, depressive and anxiety symptoms due to the all those outcomes were assessed at post treatment.

The potential modifiers for sensitivity analyses we choose are listed below:

| Sensitivity analyses                          | Efficacy at post-treatment | Efficacy at follow-up | All-caused discontinuation | Depressive symptoms | Anxiety symptoms |
|-----------------------------------------------|----------------------------|-----------------------|----------------------------|---------------------|------------------|
| Omitting trials where have not been published | √                          | √                     | √                          | √                   | √                |
| Omitting high risk of bias trials             | √                          | √                     | √                          | √                   | √                |

In dichotomous variable, the trauma was defined into two types: 1) acute/single trauma was defined as 0; 2) multiple/mixed trauma was defined as 1. The diagnosis criteria of PTSD was defined into two

types: 1) youth with a structured diagnosis of PTSD according to standardized diagnostic interviews, for example, the Diagnostic and Statistical Manual of Mental Disorders (DSM) or the International Classification of Diseases (ICD). This include full PTSD, which was defined as 1; 2) with subsyndromal symptoms of PTSD, such as subclinical/partial PTSD and scoring above a validated cut-off on a PTSD rating scale, for example the Kiddie Schedule for Affective Disorders and Schizophrenia (KSADS). Those were defined as 0. If the diagnosis criteria was mixed, then the judgment depended on which part of the patient was more than 50%. We defined self-rating as 0 and other-rating as 1. We defined participants without comorbidities as 0 and with comorbidities as 1. In part b and c, network meta-regression results of each outcome were listed.

## 1. Network meta-regression for each outcome

### a. Summary of meta-regression for efficacy at post-treatment

| Meta-regression                       |                  |                |                         |
|---------------------------------------|------------------|----------------|-------------------------|
| Characteristics                       | Tau <sup>2</sup> | I <sup>2</sup> | % of variance explained |
| <b>Unadjusted</b>                     | 0.14             | 72.88%         | ...                     |
| <b>Publication year</b>               | 0.14             | 72.45%         | -0.59%                  |
| <b>Mean age</b>                       | 0.12             | 70.47%         | -3.31%                  |
| <b>Gender (% female)</b>              | 0.14             | 74.01%         | 1.55%                   |
| <b>Sample size</b>                    | 0.14             | 70.75%         | -2.92%                  |
| <b>Treatment session</b>              | 0.13             | 70.88%         | -2.74%                  |
| <b>Treatment duration</b>             | 0.11             | 68.16%         | -6.48%                  |
| <b>Mean baseline severity of PTSD</b> | 0.15             | 75.86%         | 4.09%                   |
| <b>Risk of bias</b>                   | 0.14             | 72.35%         | -0.73%                  |
| <b>Trauma types</b>                   | 0.13             | 71.32%         | -2.14%                  |
| <b>Diagnosis criteria of PTSD</b>     | 0.14             | 73.62%         | 1.02%                   |
| <b>Rating scale</b>                   | 0.14             | 73.70%         | 1.13%                   |
| <b>Psychiatric comorbidities</b>      | 0.15             | 73.49%         | 0.84%                   |

### Results of meta-regression for efficacy at post-treatment

| Variable                              | Estimate (95% CI)*    | Std. Err. | z-value | p-value |
|---------------------------------------|-----------------------|-----------|---------|---------|
| <b>Publication year</b>               | 0.01 (-0.02 to 0.02)  | 0.01      | 0.14    | 0.8865  |
| <b>Mean age</b>                       | -0.04 (-0.10 to 0.02) | 0.03      | -1.44   | 0.1496  |
| <b>Gender (% female)</b>              | 0.19 (-0.55 to 0.92)  | 0.37      | 0.50    | 0.6161  |
| <b>Sample size</b>                    | 0.00 (0.00 to 0.00)   | 0.00      | 0.92    | 0.3578  |
| <b>Treatment session</b>              | -0.02 (-0.05 to 0.00) | 0.01      | -1.64   | 0.1017  |
| <b>Treatment duration</b>             | -0.03 (-0.06 to 0.00) | 0.01      | -1.86   | 0.0625  |
| <b>Mean baseline severity of PTSD</b> | -0.02 (-0.04 to 0.01) | 0.01      | -1.43   | 0.1539  |
| <b>Risk of bias</b>                   | -0.02 (-0.20 to 0.16) | 0.09      | -0.22   | 0.8261  |
| <b>Trauma types</b>                   | -0.21 (-0.50 to 0.07) | 0.14      | -1.47   | 0.1405  |
| <b>Diagnosis criteria of PTSD</b>     | 0.01 (-0.33 to 0.33)  | 0.17      | -0.02   | 0.9819  |
| <b>Rating scale</b>                   | 0.02 (-0.35 to 0.39)  | 0.19      | 0.11    | 0.9093  |
| <b>Psychiatric comorbidities</b>      | -0.10 (-0.39 to 0.20) | 0.15      | -0.65   | 0.5135  |

\*The estimate value of meta-regression reflects the changes of SMD when the covariate increases one unit.

\*\*Those variables have significant effects on the SMD in the meta-regression.

## b. Summary of meta-regression for efficacy at follow-up

| Meta-regression                       |                  |                |                         |
|---------------------------------------|------------------|----------------|-------------------------|
| Characteristics                       | Tau <sup>2</sup> | I <sup>2</sup> | % of variance explained |
| <b>Unadjusted</b>                     | 0.07             | 60.83%         | ...                     |
| <b>Publication year</b>               | 0.08             | 61.85%         | 1.68%                   |
| <b>Mean age</b>                       | 0.08             | 65.46%         | 7.61%                   |
| <b>Gender (% female)</b>              | 0.07             | 63.00%         | 3.57%                   |
| <b>Sample size</b>                    | 0.09             | 62.90%         | 3.40%                   |
| <b>Treatment session</b>              | 0.05             | 54.00%         | -11.23%                 |
| <b>Treatment duration</b>             | 0.07             | 58.30%         | -4.16%                  |
| <b>Followup duration</b>              | 0.08             | 58.35%         | -4.08%                  |
| <b>Mean baseline severity of PTSD</b> | 0.10             | 70.98%         | 16.69%                  |
| <b>Risk of bias</b>                   | 0.03             | 40.07%         | -34.13%                 |
| <b>Trauma types</b>                   | 0.08             | 64.44%         | 5.93%                   |
| <b>Diagnosis criteria of PTSD</b>     | 0.08             | 63.55%         | 4.47%                   |
| <b>Rating scale</b>                   | 0.06             | 59.51%         | -2.17%                  |
| <b>Psychiatric comorbidities</b>      | 0.07             | 58.40%         | -3.99%                  |

## Results of meta-regression for efficacy at follow-up

| Variable                              | Estimate (95% CI)*    | Std. Err. | z-value | p-value  |
|---------------------------------------|-----------------------|-----------|---------|----------|
| <b>Publication year</b>               | -0.01 (-0.04 to 0.02) | 0.02      | -0.69   | 0.4897   |
| <b>Mean age</b>                       | -0.03 (-0.10 to 0.05) | 0.04      | -0.68   | 0.4964   |
| <b>Gender (% female)</b>              | -0.25 (-1.26 to 0.76) | 0.51      | -0.48   | 0.6281   |
| <b>Sample size</b>                    | 0.01 (0.00 to 0.00)   | 0.00      | 0.08    | 0.9385   |
| <b>Treatment session</b>              | -0.03 (-0.06 to 0.00) | 0.02      | -1.76   | 0.0779   |
| <b>Treatment duration</b>             | -0.02 (-0.06 to 0.01) | 0.02      | -1.34   | 0.1792   |
| <b>Followup duration</b>              | -0.01 (-0.07 to 0.04) | 0.03      | -0.46   | 0.6450   |
| <b>Mean baseline severity of PTSD</b> | -0.01 (-0.04 to 0.02) | 0.02      | -0.49   | 0.6251   |
| <b>Risk of bias</b>                   | 0.27 (0.06 to 0.47)   | 0.10      | 2.54    | 0.0112** |
| <b>Trauma types</b>                   | 0.05 (-0.36 to 0.46)  | 0.20      | 0.25    | 0.8042   |
| <b>Diagnosis criteria of PTSD</b>     | 0.10 (-0.29 to 0.49)  | 0.20      | 0.50    | 0.6165   |
| <b>Rating scale</b>                   | 0.27 (-0.18 to 0.71)  | 0.23      | 1.18    | 0.2377   |
| <b>Psychiatric comorbidities</b>      | -0.30 (-0.65 to 0.05) | 0.18      | -1.66   | 0.0975   |

\*The estimate value of meta-regression reflects the changes of OR when the covariate increases one unit.



## c. Summary of meta-regression for all-caused discontinuation

| Meta-regression                       |                  |                |                         |
|---------------------------------------|------------------|----------------|-------------------------|
| Characteristics                       | Tau <sup>2</sup> | I <sup>2</sup> | % of variance explained |
| <b>Unadjusted</b>                     | 0.39             | 37.58%         | ...                     |
| <b>Publication year</b>               | 0.45             | 40.73%         | 8.38%                   |
| <b>Mean age</b>                       | 0.21             | 20.10%         | -46.51%                 |
| <b>Gender (% female)</b>              | 0.35             | 34.89%         | -7.16%                  |
| <b>Sample size</b>                    | 0.36             | 35.02%         | -6.81%                  |
| <b>Treatment session</b>              | 0.31             | 32.22%         | -14.26%                 |
| <b>Treatment duration</b>             | 0.42             | 38.13%         | 1.46%                   |
| <b>Mean baseline severity of PTSD</b> | 0.57             | 44.93%         | 19.56%                  |
| <b>Risk of bias</b>                   | 0.45             | 39.24%         | 4.42%                   |
| <b>Trauma types</b>                   | 0.13             | 16.60%         | -55.83%                 |
| <b>Diagnosis criteria of PTSD</b>     | 0.41             | 39.07%         | 3.96%                   |
| <b>Rating scale</b>                   | 0.42             | 39.26%         | 4.47%                   |
| <b>Psychiatric comorbidities</b>      | 0.38             | 36.07%         | -4.02%                  |

## Results of meta-regression for all-caused discontinuation

| Variable                              | Estimate (95% CI)*     | Std. Err. | z-value | p-value  |
|---------------------------------------|------------------------|-----------|---------|----------|
| <b>Publication year</b>               | 0.01 (-0.05 to 0.06)   | 0.03      | 0.24    | 0.8124   |
| <b>Mean age</b>                       | 0.09 (-0.02 to 0.20)   | 0.06      | 1.62    | 0.1042   |
| <b>Gender (% female)</b>              | -0.98 (-3.09 to 1.12)  | 1.08      | -0.92   | 0.3599   |
| <b>Sample size</b>                    | 0.01 (-0.01 to 0.00)   | 0.00      | -2.07   | 0.0386** |
| <b>Treatment session</b>              | -0.11 (-0.21 to -0.01) | 0.05      | -2.10   | 0.0358** |
| <b>Treatment duration</b>             | 0.01 (-0.08 to 0.09)   | 0.04      | 0.13    | 0.8930   |
| <b>Mean baseline severity of PTSD</b> | -0.02 (-0.09 to 0.05)  | 0.04      | -0.52   | 0.6028   |
| <b>Risk of bias</b>                   | 0.24 (-0.27 to 0.75)   | 0.26      | 0.91    | 0.3620   |
| <b>Trauma types</b>                   | -0.85 (-1.47 to -0.23) | 0.32      | -2.70   | 0.0070** |
| <b>Diagnosis criteria of PTSD</b>     | 0.12 (-0.86 to 1.09)   | 0.50      | 0.23    | 0.8153   |
| <b>Rating scale</b>                   | 0.08 (-0.91 to 1.06)   | 0.50      | 0.15    | 0.8773   |
| <b>Psychiatric comorbidities</b>      | -0.48 (-1.21 to 0.26)  | 0.38      | -1.27   | 0.2034   |

\*The estimate value of meta-regression reflects the changes of SMD when the covariate increases one unit.

\*\*Those variables have significant effects on the SMD in the meta-regression.

## d. Summary of meta-regression for depressive symptoms

| Meta-regression                       |                  |                |                         |
|---------------------------------------|------------------|----------------|-------------------------|
| Characteristics                       | Tau <sup>2</sup> | I <sup>2</sup> | % of variance explained |
| <b>Unadjusted</b>                     | 0.08             | 55.87%         | ...                     |
| <b>Publication year</b>               | 0.08             | 56.78%         | 1.63%                   |
| <b>Mean age</b>                       | 0.07             | 51.92%         | -7.07%                  |
| <b>Gender (% female)</b>              | 0.08             | 57.14%         | 2.27%                   |
| <b>Sample size</b>                    | 0.08             | 53.80%         | -3.71%                  |
| <b>Treatment session</b>              | 0.08             | 56.20%         | 0.59%                   |
| <b>Treatment duration</b>             | 0.07             | 52.64%         | -5.78%                  |
| <b>Mean baseline severity of PTSD</b> | 0.08             | 59.00%         | 5.60%                   |
| <b>Risk of bias</b>                   | 0.07             | 53.12%         | -4.92%                  |
| <b>Trauma types</b>                   | 0.05             | 46.38%         | -16.99%                 |
| <b>Diagnosis criteria of PTSD</b>     | 0.08             | 57.26%         | 2.49%                   |
| <b>Rating scale</b>                   | 0.08             | 56.71%         | 1.50%                   |
| <b>Psychiatric comorbidities</b>      | 0.04             | 40.83%         | -26.92%                 |

## Results of meta-regression for depressive symptoms

| Variable                              | Estimate (95% CI)*     | Std. Err. | z-value | p-value  |
|---------------------------------------|------------------------|-----------|---------|----------|
| <b>Publication year</b>               | 0.01 (-0.02 to 0.03)   | 0.01      | 0.55    | 0.5842   |
| <b>Mean age</b>                       | -0.05 (-0.10 to 0.00)  | 0.03      | -1.82   | 0.0682   |
| <b>Gender (% female)</b>              | -0.04 (-0.70 to 0.63)  | 0.34      | -0.11   | 0.9129   |
| <b>Sample size</b>                    | 0.00 (0.00 to 0.00)    | 0.00      | 0.85    | 0.3964   |
| <b>Treatment session</b>              | -0.02 (-0.05 to 0.01)  | 0.02      | -1.15   | 0.2487   |
| <b>Treatment duration</b>             | -0.03 (-0.06 to 0.01)  | 0.02      | -1.47   | 0.1429   |
| <b>Mean baseline severity of PTSD</b> | -0.03 (-0.07 to 0.01)  | 0.02      | -1.55   | 0.1210   |
| <b>Risk of bias</b>                   | 0.11 (-0.07 to 0.30)   | 0.09      | 1.22    | 0.2234   |
| <b>Trauma types</b>                   | -0.35 (-0.62 to -0.08) | 0.14      | -2.54   | 0.0110** |
| <b>Diagnosis criteria of PTSD</b>     | -0.17 (-0.54 to 0.21)  | 0.19      | -0.87   | 0.3863   |
| <b>Rating scale</b>                   | 0.18 (-0.22 to 0.58)   | 0.20      | 0.89    | 0.3745   |
| <b>Psychiatric comorbidities</b>      | -0.44 (-0.71 to -0.17) | 0.14      | -3.15   | 0.0016** |

\*The estimate value of meta-regression reflects the changes of SMD when the covariate increases one unit.

\*\*Those variables have significant effects on the SMD in the meta-regression.

## e. Summary of meta-regression for anxiety symptoms

| Meta-regression                       |                  |                |                         |
|---------------------------------------|------------------|----------------|-------------------------|
| Characteristics                       | Tau <sup>2</sup> | I <sup>2</sup> | % of variance explained |
| <b>Unadjusted</b>                     | 0.04             | 46.13%         | ...                     |
| <b>Publication year</b>               | 0.05             | 47.02%         | 1.93%                   |
| <b>Mean age</b>                       | 0.04             | 43.95%         | -4.73%                  |
| <b>Gender (% female)</b>              | 0.04             | 41.48%         | -10.08%                 |
| <b>Sample size</b>                    | 0.05             | 45.32%         | -1.76%                  |
| <b>Treatment session</b>              | 0.05             | 46.74%         | 1.32%                   |
| <b>Treatment duration</b>             | 0.06             | 49.13%         | 6.50%                   |
| <b>Mean baseline severity of PTSD</b> | 0.06             | 55.82%         | 21.01%                  |
| <b>Risk of bias</b>                   | 0.04             | 42.33%         | -8.24%                  |
| <b>Trauma types</b>                   | 0.04             | 42.48%         | -7.91%                  |
| <b>Diagnosis criteria of PTSD</b>     | 0.05             | 47.08%         | 2.06%                   |
| <b>Rating scale</b>                   | 0.05             | 49.63%         | 7.59%                   |
| <b>Psychiatric comorbidities</b>      | 0.04             | 41.39%         | -10.28%                 |

## Results of meta-regression for anxiety symptoms

| Variable                              | Estimate (95% CI)*     | Std. Err. | z-value | p-value  |
|---------------------------------------|------------------------|-----------|---------|----------|
| <b>Publication year</b>               | -0.01 (-0.03 to 0.01)  | 0.01      | -0.71   | 0.4777   |
| <b>Mean age</b>                       | -0.05 (-0.10 to 0.00)  | 0.03      | -1.78   | 0.0747   |
| <b>Gender (% female)</b>              | -0.79 (-1.87 to 0.28)  | 0.55      | -1.44   | 0.1494   |
| <b>Sample size</b>                    | 0.01 (0.00 to 0.00)    | 0.00      | 0.85    | 0.3929   |
| <b>Treatment session</b>              | -0.02 (-0.05 to 0.02)  | 0.02      | -0.88   | 0.3771   |
| <b>Treatment duration</b>             | -0.01 (-0.05 to 0.03)  | 0.02      | -0.43   | 0.6700   |
| <b>Mean baseline severity of PTSD</b> | -0.02 (-0.05 to 0.01)  | 0.02      | -1.48   | 0.1376   |
| <b>Risk of bias</b>                   | 0.15 (-0.04 to 0.34)   | 0.09      | 1.58    | 0.1146   |
| <b>Trauma types</b>                   | -0.21 (-0.50 to 0.07)  | 0.14      | -1.49   | 0.1374   |
| <b>Diagnosis criteria of PTSD</b>     | -0.23 (-0.70 to 0.23)  | 0.24      | -0.99   | 0.3226   |
| <b>Rating scale</b>                   | 0.11 (-0.37 to 0.59)   | 0.25      | 0.46    | 0.6456   |
| <b>Psychiatric comorbidities</b>      | -0.30 (-0.59 to -0.01) | 0.15      | -2.05   | 0.0403** |

\*The estimate value of meta-regression reflects the changes of SMD when the covariate increases one unit.

\*\*Those variables have significant effects on the SMD in the meta-regression.

## 2. Sensitivity network meta-analysis for each outcome

### a. Sensitivity network meta-analysis for efficacy at post-treatment with waitlist by standard mean difference (95%CI)\*

| Characteristics | All trials                           | Omitting the unpublished trials      | Omitting high risk of bias trials    |
|-----------------|--------------------------------------|--------------------------------------|--------------------------------------|
| BT              | <b><u>-0.96 (-1.55 to -0.38)</u></b> | <b><u>-0.98 (-1.60 to -0.37)</u></b> | <b><u>-0.93 (-1.57 to -0.30)</u></b> |
| CPT             | <b><u>-1.30 (-2.08 to -0.52)</u></b> | <b><u>-1.50 (-2.63 to -0.37)</u></b> | -1.09 (-2.27 to 0.09)                |
| CT              | <b><u>-1.02 (-1.83 to -0.22)</u></b> | <b><u>-1.04 (-1.87 to -0.21)</u></b> | <b><u>-1.04 (-1.89 to -0.20)</u></b> |
| DYN             | -0.49 (-1.67 to 0.70)                | -0.51 (-1.75 to 0.73)                | -0.46 (-1.72 to 0.80)                |
| EMDR            | <b><u>-0.60 (-0.99 to -0.21)</u></b> | <b><u>-0.62 (-1.02 to -0.21)</u></b> | -0.47 (-0.96 to 0.02)                |
| FT              | -0.18 (-1.05 to 0.69)                | -0.18 (-1.10 to 0.74)                | -0.18 (-1.12 to 0.75)                |
| G-nTF-CBT       | <b><u>-0.92 (-1.60 to -0.24)</u></b> | <b><u>-0.94 (-1.66 to -0.22)</u></b> | <b><u>-0.96 (-1.69 to -0.23)</u></b> |
| G-TF-CBT        | <b><u>-0.50 (-0.79 to -0.20)</u></b> | <b><u>-0.53 (-0.89 to -0.18)</u></b> | <b><u>-0.57 (-0.94 to -0.20)</u></b> |
| I-nTF-CBT       | -0.50 (-1.09 to 0.08)                | -0.53 (-1.14 to 0.08)                | -0.09 (-0.97 to 0.79)                |
| I-TF-CBT        | <b><u>-0.80 (-1.09 to -0.52)</u></b> | <b><u>-0.83 (-1.14 to -0.52)</u></b> | <b><u>-0.84 (-1.17 to -0.50)</u></b> |
| NT              | 0.10 (-0.45 to 0.64)                 | 0.08 (-0.50 to 0.66)                 | 0.24 (-0.51 to 0.98)                 |
| P-TF-CBT        | -0.55 (-1.45 to 0.36)                | -0.58 (-1.53 to 0.37)                | ...                                  |
| PT              | -1.01 (-2.17 to 0.14)                | -1.04 (-2.24 to 0.16)                | ...                                  |
| SM              | -0.95 (-2.17 to 0.27)                | -0.97 (-2.24 to 0.30)                | -0.92 (-2.21 to 0.37)                |
| ST              | -0.22 (-0.62 to 0.18)                | -0.24 (-0.67 to 0.18)                | -0.11 (-0.60 to 0.39)                |
| TAU             | -0.14 (-0.54 to 0.26)                | -0.17 (-0.63 to 0.28)                | -0.27 (-0.76 to 0.23)                |

\*Negative effect sizes indicate superiority of the specific intervention against waitlist.

**b. Sensitivity network meta-analysis for efficacy at follow-up with waitlist by standard mean difference (95%CI)\***

| Characteristics | All trials                           | Omitting the unpublished trials      | Omitting high risk of bias trials    |
|-----------------|--------------------------------------|--------------------------------------|--------------------------------------|
| BT              | <b><u>-1.10 (-1.62 to -0.58)</u></b> | <b><u>-1.08 (-1.54 to -0.63)</u></b> | <b><u>-1.12 (-1.64 to -0.60)</u></b> |
| CPT             | <b><u>-1.85 (-2.79 to -0.91)</u></b> | ...                                  | <b><u>-1.85 (-2.78 to -0.92)</u></b> |
| CT              | -0.48 (-1.29 to 0.33)                | -0.44 (-1.17 to 0.28)                | -0.48 (-1.28 to 0.33)                |
| DYN             | -0.57 (-1.47 to 0.32)                | -0.56 (-1.35 to 0.24)                | -0.60 (-1.48 to 0.29)                |
| EMDR            | <b><u>-0.53 (-1.02 to -0.05)</u></b> | <b><u>-0.50 (-0.91 to -0.10)</u></b> | <b><u>-0.53 (-1.01 to -0.05)</u></b> |
| G-nTF-CBT       | -0.23 (-0.64 to 0.19)                | -0.17 (-0.51 to 0.18)                | -0.27 (-0.68 to 0.13)                |
| G-TF-CBT        | <b><u>-0.25 (-0.43 to -0.07)</u></b> | -0.14 (-0.33 to 0.05)                | <b><u>-0.35 (-0.56 to -0.14)</u></b> |
| I-nTF-CBT       | -0.33 (-1.01 to 0.36)                | -0.24 (-0.86 to 0.38)                | -0.61 (-1.59 to 0.36)                |
| I-TF-CBT        | <b><u>-0.41 (-0.69 to -0.13)</u></b> | <b><u>-0.37 (-0.60 to -0.14)</u></b> | <b><u>-0.41 (-0.70 to -0.11)</u></b> |
| NT              | 0.57 (-0.14 to 1.29)                 | 0.63 (-0.04 to 1.30)                 | 0.44 (-0.31 to 1.19)                 |
| SM              | <b><u>-1.17 (-1.90 to -0.44)</u></b> | <b><u>-1.33 (-2.19 to -0.48)</u></b> | <b><u>-1.19 (-1.91 to -0.47)</u></b> |
| ST              | 0.07 (-0.32 to 0.47)                 | 0.08 (-0.26 to 0.41)                 | 0.04 (-0.36 to 0.45)                 |
| TAU             | 0.26 (-0.14 to 0.65)                 | 0.38 (0.13 to 0.64)                  | 0.19 (-0.20 to 0.59)                 |

\*Negative effect sizes indicate superiority of the specific intervention against waitlist.

**c. Sensitivity network meta-analysis for all-cause discontinuation with waitlist by odds ratio (95%CI)\***

| Characteristics | All trials                         | Omitting the unpublished trials    | Omitting high risk of bias trials  |
|-----------------|------------------------------------|------------------------------------|------------------------------------|
| BT              | 1.38 (0.43 to 4.45)                | 1.50 (0.47 to 4.75)                | 2.37 (0.77 to 7.31)                |
| CPT             | 1.00 (0.02 to 58.43)               | 1.00 (0.02 to 57.83)               | ...                                |
| CT              | 0.82 (0.19 to 3.57)                | 0.87 (0.20 to 3.71)                | 1.09 (0.28 to 4.28)                |
| DYN             | 1.38 (0.16 to 11.76)               | 1.50 (0.18 to 12.41)               | 2.37 (0.32 to 17.37)               |
| EMDR            | 1.17 (0.49 to 2.82)                | 1.26 (0.53 to 2.98)                | 2.13 (0.68 to 6.67)                |
| FT              | <b><u>8.51 (2.20 to 32.89)</u></b> | <b><u>8.51 (2.28 to 31.87)</u></b> | <b><u>8.51 (2.72 to 26.64)</u></b> |
| G-nTF-CBT       | 0.99 (0.16 to 6.01)                | 1.06 (0.17 to 6.41)                | 0.83 (0.14 to 4.70)                |
| G-TF-CBT        | 0.87 (0.35 to 2.12)                | 0.99 (0.38 to 2.58)                | 0.60 (0.23 to 1.58)                |
| I-nTF-CBT       | 1.34 (0.46 to 3.87)                | 1.48 (0.52 to 4.22)                | 3.28 (0.66 to 16.39)               |
| I-TF-CBT        | 0.99 (0.56 to 1.76)                | 1.07 (0.61 to 1.88)                | 1.43 (0.80 to 2.53)                |
| NT              | 0.15 (0.05 to 0.48)                | 0.17 (0.05 to 0.52)                | 0.09 (0.02 to 0.57)                |
| P-TF-CBT        | 1.22 (0.21 to 6.96)                | 1.39 (0.25 to 7.79)                | ...                                |
| SM              | 3.01 (0.17 to 52.02)               | 1.60 (0.02 to 109.51)              | 5.20 (0.32 to 84.02)               |
| ST              | 1.06 (0.53 to 2.12)                | 1.13 (0.57 to 2.24)                | 2.07 (0.98 to 4.37)                |
| TAU             | 0.89 (0.40 to 1.98)                | 1.09 (0.48 to 2.48)                | 1.27 (0.58 to 2.77)                |

\* Odds ratio <1 indicate superiority of the specific intervention against waitlist

**d. Sensitivity network meta-analysis for depressive symptoms with waitlist by standard mean difference (95%CI)\***

| Characteristics | All trials                           | Omitting the unpublished trials      | Omitting high risk of bias trials    |
|-----------------|--------------------------------------|--------------------------------------|--------------------------------------|
| BT              | <b><u>-0.75 (-1.33 to -0.16)</u></b> | <b><u>-0.81 (-1.42 to -0.21)</u></b> | <b><u>-0.88 (-1.47 to -0.28)</u></b> |
| CPT             | <b><u>-1.16 (-1.80 to -0.51)</u></b> | <b><u>-1.41 (-2.31 to -0.50)</u></b> | -0.88 (-1.81 to 0.05)                |
| CT              | -0.61 (-1.27 to 0.05)                | -0.63 (-1.30 to 0.03)                | -0.65 (-1.31 to 0.00)                |
| DYN             | -0.67 (-1.69 to 0.35)                | -0.74 (-1.77 to 0.30)                | -0.80 (-1.81 to 0.21)                |
| EMDR            | <b><u>-0.46 (-0.84 to -0.07)</u></b> | <b><u>-0.50 (-0.90 to -0.10)</u></b> | <b><u>-0.71 (-1.14 to -0.28)</u></b> |
| G-nTF-CBT       | -0.76 (-1.53 to 0.01)                | -0.74 (-1.55 to 0.07)                | <b><u>-0.81 (-1.59 to -0.03)</u></b> |
| G-TF-CBT        | <b><u>-0.29 (-0.53 to -0.04)</u></b> | -0.27 (-0.59 to 0.06)                | <b><u>-0.33 (-0.64 to -0.03)</u></b> |
| I-nTF-CBT       | -0.14 (-0.63 to 0.36)                | -0.19 (-0.70 to 0.32)                | 0.15 (-0.56 to 0.86)                 |
| I-TF-CBT        | <b><u>-0.52 (-0.77 to -0.26)</u></b> | <b><u>-0.56 (-0.82 to -0.29)</u></b> | <b><u>-0.59 (-0.86 to -0.33)</u></b> |
| NT              | 0.05 (-0.68 to 0.79)                 | 0.03 (-0.72 to 0.78)                 | 0.12 (-0.64 to 0.88)                 |
| P-TF-CBT        | -0.37 (-1.10 to 0.35)                | -0.45 (-1.19 to 0.29)                | ...                                  |
| SM              | -0.67 (-1.65 to 0.31)                | ...                                  | -0.80 (-1.78 to 0.18)                |
| ST              | -0.06 (-0.45 to 0.33)                | -0.11 (-0.51 to 0.30)                | -0.09 (-0.49 to 0.32)                |
| TAU             | 0.02 (-0.36 to 0.40)                 | -0.11 (-0.55 to 0.33)                | -0.42 (-0.93 to 0.09)                |

\*Negative effect sizes indicate superiority of the specific intervention against waitlist.

e. Sensitivity network meta-analysis for anxiety symptoms with waitlist by standard mean difference (95%CI)\*

| Characteristics | All trials                           | Omitting the unpublished trials      | Omitting high risk of bias trials    |
|-----------------|--------------------------------------|--------------------------------------|--------------------------------------|
| CT              | <b><u>-0.69 (-1.32 to -0.06)</u></b> | <b><u>-0.69 (-1.34 to -0.04)</u></b> | <b><u>-0.70 (-1.38 to -0.01)</u></b> |
| EMDR            | <b><u>-0.51 (-0.88 to -0.14)</u></b> | <b><u>-0.51 (-0.90 to -0.13)</u></b> | <b><u>-0.59 (-1.04 to -0.13)</u></b> |
| FT              | -0.05 (-0.60 to 0.50)                | -0.05 (-0.64 to 0.53)                | -0.05 (-0.70 to 0.59)                |
| G-nTF-CBT       | -0.08 (-0.81 to 0.64)                | -0.03 (-0.82 to 0.76)                | -0.07 (-0.92 to 0.77)                |
| G-TF-CBT        | -0.07 (-0.37 to 0.22)                | -0.02 (-0.40 to 0.37)                | -0.06 (-0.46 to 0.34)                |
| I-nTF-CBT       | -0.08 (-0.64 to 0.49)                | -0.08 (-0.67 to 0.51)                | -0.40 (-1.33 to 0.52)                |
| I-TF-CBT        | <b><u>-0.49 (-0.73 to -0.25)</u></b> | <b><u>-0.49 (-0.74 to -0.24)</u></b> | <b><u>-0.50 (-0.79 to -0.21)</u></b> |
| P-TF-CBT        | -0.35 (-1.03 to 0.33)                | -0.35 (-1.05 to 0.35)                | ...                                  |
| ST              | -0.18 (-0.50 to 0.15)                | -0.18 (-0.52 to 0.16)                | -0.23 (-0.68 to 0.22)                |
| TAU             | -0.24 (-0.68 to 0.19)                | -0.25 (-0.70 to 0.21)                | -0.36 (-0.94 to 0.22)                |

\*Negative effect sizes indicate superiority of the specific intervention against waitlist.



## eAppendix 15. Treatment ranking for each outcome

### a. P-score of treatment ranking for efficacy at post-treatment

#### Treatment ranking:

| Rank | Treatments | P-score (random) |
|------|------------|------------------|
| 1    | CPT        | 0.8743           |
| 2    | CT         | 0.7613           |
| 3    | BT         | 0.7587           |
| 4    | PT         | 0.7219           |
| 5    | G-nTF-CBT  | 0.7181           |
| 6    | SM         | 0.6883           |
| 7    | I-TF-CBT   | 0.6780           |
| 8    | EMDR       | 0.5229           |
| 9    | P-TF-CBT   | 0.4839           |
| 10   | I-nTF-CBT  | 0.4576           |
| 11   | DYN        | 0.4481           |
| 12   | G-TF-CBT   | 0.4460           |
| 13   | FT         | 0.2738           |
| 14   | ST         | 0.2557           |
| 15   | TAU        | 0.2023           |
| 16   | WL         | 0.1158           |
| 17   | NT         | 0.0933           |

\* Larger P-score denote more effective interventions.

BT= Behavioral therapy. CPT= Cognitive processing therapy. CT= Cognitive therapy. DYN= Psychodynamic therapy. EMDR= Eye movement desensitization and reprocessing. FT = Family therapy. G-TF-CBT= Group trauma-focused cognitive behavioral therapy. G-nTF-CBT= Group non-trauma-focused cognitive behavioral therapy. I-TF-CBT= Individual trauma-focused cognitive behavioral therapy. I-nTF-CBT= Individual non-trauma-focused cognitive behavioral therapy. NT= No treatment. P-TF-CBT = Parent-only trauma-focused cognitive behavioral therapy. PT= Play therapy. SM= Stress management. ST= Supportive therapy. TAU= Treatment as usual. WL= Waitlist.

**b. P-score of treatment ranking for efficacy at follow-up**

| Rank | Treatments | P-score (random) |
|------|------------|------------------|
| 1    | CPT        | 0.9789           |
| 2    | SM         | 0.8759           |
| 3    | BT         | 0.8639           |
| 4    | EMDR       | 0.6287           |
| 5    | DYN        | 0.6074           |
| 6    | CT         | 0.5702           |
| 7    | I-TF-CBT   | 0.5641           |
| 8    | I-nTF-CBT  | 0.4875           |
| 9    | G-TF-CBT   | 0.4370           |
| 10   | G-nTF-CBT  | 0.4191           |
| 11   | WL         | 0.2348           |
| 12   | ST         | 0.1957           |
| 13   | TAU        | 0.1022           |
| 14   | NT         | 0.0347           |

\* Larger P-score denote more effective interventions.

BT= Behavioral therapy. CPT= Cognitive processing therapy. CT= Cognitive therapy. DYN= Psychodynamic therapy. EMDR= Eye movement desensitization and reprocessing. G-TF-CBT= Group trauma-focused cognitive behavioral therapy. G-nTF-CBT= Group non-trauma-focused cognitive behavioral therapy. I-TF-CBT= Individual trauma-focused cognitive behavioral therapy. I-nTF-CBT= Individual non-trauma-focused cognitive behavioral therapy. NT= No treatment. SM= Stress management. ST= Supportive therapy. TAU= Treatment as usual. WL= Waitlist.

**c. P-score of treatment ranking for all-cause discontinuation**

| Rank | Treatments | P-score (random) |
|------|------------|------------------|
| 1    | NT         | 0.9770           |
| 2    | G-TF-CBT   | 0.6180           |
| 3    | TAU        | 0.6173           |
| 4    | CT         | 0.6144           |
| 5    | I-TF-CBT   | 0.5575           |
| 6    | WL         | 0.5494           |
| 7    | G-nTF-CBT  | 0.5396           |
| 8    | CPT        | 0.5235           |
| 9    | ST         | 0.5183           |
| 10   | P-TF-CBT   | 0.4675           |
| 11   | EMDR       | 0.4602           |
| 12   | DYN        | 0.4387           |
| 13   | I-nTF-CBT  | 0.4026           |
| 14   | BT         | 0.4002           |
| 15   | SM         | 0.2726           |
| 16   | FT         | 0.0431           |

\* Larger P-score denote more effective interventions.

BT= Behavioral therapy. CPT= Cognitive processing therapy. CT= Cognitive therapy. DYN= Psychodynamic therapy. EMDR= Eye movement desensitization and reprocessing. FT = Family therapy. G-TF-CBT= Group trauma-focused cognitive behavioral therapy. G-nTF-CBT= Group non-trauma-focused cognitive behavioral therapy. I-TF-CBT= Individual trauma-focused cognitive behavioral therapy. I-nTF-CBT= Individual non-trauma-focused cognitive behavioral therapy. NT= No treatment. P-TF-CBT = Parent-only trauma-focused cognitive behavioral therapy. SM= Stress management. ST= Supportive therapy. TAU= Treatment as usual. WL= Waitlist.

**d. P-score of treatment ranking for depressive symptoms**

| Rank | Treatments | P-score (random) |
|------|------------|------------------|
| 1    | CPT        | 0.9211           |
| 2    | BT         | 0.7641           |
| 3    | G-nTF-CBT  | 0.7400           |
| 4    | SM         | 0.6670           |
| 5    | DYN        | 0.6626           |
| 6    | CT         | 0.6599           |
| 7    | I-TF-CBT   | 0.6256           |
| 8    | EMDR       | 0.5640           |
| 9    | P-TF-CBT   | 0.4858           |
| 10   | G-TF-CBT   | 0.4160           |
| 11   | I-nTF-CBT  | 0.2893           |
| 12   | ST         | 0.2135           |
| 13   | NT         | 0.1823           |
| 14   | WL         | 0.1571           |
| 15   | TAU        | 0.1516           |

\* Larger P-score denote more effective interventions.

BT= Behavioral therapy. CPT= Cognitive processing therapy. CT= Cognitive therapy. DYN= Psychodynamic therapy. EMDR= Eye movement desensitization and reprocessing. G-TF-CBT= Group trauma-focused cognitive behavioral therapy. G-nTF-CBT= Group non-trauma-focused cognitive behavioral therapy. I-TF-CBT= Individual trauma-focused cognitive behavioral therapy. I-nTF-CBT= Individual non-trauma-focused cognitive behavioral therapy. NT= No treatment. P-TF-CBT = Parent-only trauma-focused cognitive behavioral therapy. SM= Stress management. ST= Supportive therapy. TAU= Treatment as usual. WL= Waitlist.

**e. P-score of treatment ranking for anxiety symptoms**

| Rank | Treatments | P-score (random) |
|------|------------|------------------|
| 1    | CT         | 0.8696           |
| 2    | I-TF-CBT   | 0.7986           |
| 3    | EMDR       | 0.7968           |
| 4    | P-TF-CBT   | 0.5998           |
| 5    | TAU        | 0.4974           |
| 6    | ST         | 0.4280           |
| 7    | G-nTF-CBT  | 0.3614           |
| 8    | I-nTF-CBT  | 0.3251           |
| 9    | FT         | 0.3127           |
| 10   | G-TF-CBT   | 0.3113           |
| 11   | WL         | 0.1993           |

\* Larger P-score denote more effective interventions.

CT= Cognitive therapy. EMDR= Eye movement desensitization and reprocessing. FT = Family therapy. G-TF-CBT= Group trauma-focused cognitive behavioral therapy. G-nTF-CBT= Group non-trauma-focused cognitive behavioral therapy. I-TF-CBT= Individual trauma-focused cognitive behavioral therapy. I-nTF-CBT= Individual non-trauma-focused cognitive behavioral therapy. P-TF-CBT = Parent-only trauma-focused cognitive behavioral therapy. ST= Supportive therapy. TAU= Treatment as usual. WL= Waitlist.

## Appendix 16. Grading the evidence of the network meta-analysis using CINeMA

The CINeMA application was employed to evaluate the confidence of findings from each network meta-analysis according to the following domains: within-study bias, imprecision, heterogeneity, incoherence, indirectness and across-study bias. We used the CINeMA software (<https://cinema.ispm.unibe.ch/>), which is based on the framework developed by Salanti G et al (Salanti G, Del Giovane C, Chaimani A, Caldwell DM, Higgins JP. Evaluating the quality of evidence from a network meta-analysis. *PLoS One*. 2014;9(7):e99682. doi:10.1371/journal.pone.0099682) and refined by Nikolakopoulou et al (Nikolakopoulou A, PT Higgins J, Papakonstantinou T et al., Assessing Confidence in the Results of Network Meta-Analysis (Cinema). *bioRxiv* 2019; 597047. doi: <https://doi.org/10.1101/597047>). We assigned ‘no concerns’, ‘some concerns’ or ‘major concerns’ to each network estimate and domain based on the criteria described in the CINeMA documentation and those reported below for each domain. We derived an overall judgment of the confidence that goes from high to very low considering all domains judgments jointly.

### 1. Within-study bias

We classified an overall risk of bias for every study based on the individual risk of bias items. The risk of bias of each study is reported in **Appendix 6**. The classification is based on the Revised Cochrane risk-of-bias tool for randomized trials (RoB 2.0) recommendations from the following reference: “Sterne JAC, Savović J, Page MJ, et al. RoB 2: a revised tool for assessing risk of bias in randomised trials. *BMJ*. 2019;366:14898. doi:10.1136/bmj.14898” We assigned score 1 to study with low risk of bias, score 2 for moderate risk of bias and 3 for high risk of bias. The risk of bias across studies for the comparisons of interest was summarized by using the ‘average’ risk of bias. We assigned ‘some concerns’ to network estimates when more than 50% of contribution of studies to network estimates was from studies with moderate risk of bias, and “major concerns” when more than 50% of contribution was from studies with high risk of bias and ‘no concerns’ otherwise. The contribution matrix reporting the contribution of each study to each network estimate and the bar graph presenting the study risk of bias proportional to the percentage contribution are in online sharing dataset (online dataset available at <http://dx.doi.org/10.17632/278y88n8r7.1>). In the bar graph, the bars of each study are coloured according to the study risk of bias (green for low, yellow for unclear and red for high risk of bias).

### 2. Across-studies bias

We considered the comprehensiveness of our search strategy and the potential presence of asymmetry by the visual inspection of the comparison-adjusted funnel plots (see **Appendix 13**). We considered our search strategy comprehensive. The comparison-adjusted funnel plots of the network meta-analysis weren’t suggestive of obvious publication bias for all outcomes. All comparisons of interest for across-study bias were assigned ‘undetected’.

### 3. Indirectness

We assigned score 1 to study with low indirectness, score 2 for moderate indirectness and 3 for high indirectness. The assessment of transitivity (see **Appendix 12**) suggested there were a few comparisons that had relatively low or high values, so we assigned score 2 to studies for which the comparison had one extreme value, and score 3 to studies for which the comparison had two extreme value. All the other studies were rated as score 1. We summarized the indirectness across studies for the comparisons of interest by using the ‘average’ indirectness, similarly to within-study bias. The bar graph presenting the study indirectness proportional to the percentage contribution is reported in online sharing dataset (online dataset available at <http://dx.doi.org/10.17632/278y88n8r7.1>).

### 4. Imprecision

For continuous outcomes, the clinically meaningful threshold was set at a standardized mean difference of higher or lower than 0. For dichotomous outcomes, an odds ratio lower or higher than 1 was considered clinically meaningful. If the confidence interval crossed the threshold the comparison was downgraded levels. For comparisons of two psychotherapies the clinically meaningful threshold was set at standardized mean differences of -0.2 and 0.2 for continuous outcomes and at odds ratio of 0.8 and 1.25 for dichotomous outcomes. If the confidence interval crossed one threshold the comparison was downgraded one level. Crossing both thresholds resulted in a downgrading of two levels. The specific criteria used to judge imprecision are reported in the explanatory document within CINeMA. For example, if the upper limit (or the lower limit) of the confidence interval of a network estimate for

a continuous outcome was below -0.2 (or above 0.2) we assigned 'no concerns' to the estimate for imprecision.

### 5. Heterogeneity

We made use of prediction intervals to prepopulate judgments on heterogeneity and its implications on the quality of the network treatment effects. In particular, we judged the agreement of conclusions based on confidence and prediction intervals in relation to the clinically important effect size. The same thresholds for clinically meaningful thresholds as above were used and the recommendations automatically provided by CINeMA were followed (<http://cinema.ispm.ch/#doc>). For example, if the upper limit (or the lower limit) of both the confidence interval and prediction interval of a network estimate for a continuous outcome were below -0.2 (or above 0.2) we assigned 'no concerns' to the estimate for heterogeneity.

The rules were summarized below.

| Number of crossings of the interval formed by clinically meaningful threshold |   | Prediction intervals |               |                |
|-------------------------------------------------------------------------------|---|----------------------|---------------|----------------|
|                                                                               |   | 0                    | 1             | 2              |
| Confidence intervals                                                          | 0 | No concerns          | Some concerns | Major concerns |
|                                                                               | 1 | NA                   | No concerns   | Some concerns  |
|                                                                               | 2 | NA                   | NA            | No concerns    |

### 6. Incoherence

Comparisons based on both direct and indirect evidence with p value of node-splitting less than 0.1 were downgraded, otherwise no downgraded. Comparisons based only on direct evidence or indirect evidence with p value of the design-by-treatment less than 0.1 were downgraded, otherwise no downgraded. If the design-by-treatment interaction test was not estimable (because the network did not have any closed loop of evidence) then 'Major concerns' are assigned to all comparisons.

The rules were summarized below.

### 7. Confidence rating: judgments for all six domains

The default judgment is 'High' confidence; downgrading by one, two, or three levels will lead to a confidence rating of 'Moderate', 'Low', or 'Very low' respectively. We considered judgments on different domains jointly rather than in isolation. For example, 'Incoherence', 'Imprecision' and 'Heterogeneity' are related as big heterogeneity will also affect the precision of relative treatment effects. So we did not double count the downgrade score of imprecision, heterogeneity and incoherence the same comparisons at the same time.

## a. The confidence in SMD for efficacy at post-treatment for all comparisons by CINeMA approach

| Comparison            | Within-study bias | Reporting bias | Indirectness | Imprecision    | Heterogeneity  | Incoherence    | Downgrading                                               | Confidence rating |
|-----------------------|-------------------|----------------|--------------|----------------|----------------|----------------|-----------------------------------------------------------|-------------------|
| BT vs DYN             | Some concerns     | Undetected     | No concerns  | Major concerns | No concerns    | No concerns    | -1* within-study bias, -2* imprecision                    | Very low          |
| BT vs SM              | No concerns       | Undetected     | No concerns  | Major concerns | No concerns    | No concerns    | -2* imprecision                                           | Low               |
| BT vs ST              | Some concerns     | Undetected     | No concerns  | No concerns    | Major concerns | Major concerns | -1* within-study bias, -1* heterogeneity, -1* incoherence | Very low          |
| BT vs TAU             | Some concerns     | Undetected     | No concerns  | No concerns    | Major concerns | No concerns    | -1* within-study bias, -2* heterogeneity                  | Very low          |
| BT vs WL              | Some concerns     | Undetected     | No concerns  | No concerns    | Some concerns  | No concerns    | -1* within-study bias, -1* heterogeneity                  | Low               |
| CPT vs WL             | Some concerns     | Undetected     | No concerns  | No concerns    | No concerns    | No concerns    | -1* within-study bias                                     | Moderate          |
| CT vs I-TF-CBT        | Some concerns     | Undetected     | No concerns  | Major concerns | No concerns    | No concerns    | -1* within-study bias, -2* imprecision                    | Very low          |
| CT vs WL              | No concerns       | Undetected     | No concerns  | No concerns    | Some concerns  | No concerns    | -1* heterogeneity                                         | Moderate          |
| EMDR vs I-TF-CBT      | Some concerns     | Undetected     | No concerns  | Some concerns  | Some concerns  | Some concerns  | -1* within-study bias, -1* imprecision, -1* heterogeneity | Very low          |
| EMDR vs NT            | Some concerns     | Undetected     | No concerns  | No concerns    | Major concerns | No concerns    | -1* within-study bias, -2* heterogeneity                  | Very low          |
| EMDR vs TAU           | Some concerns     | Undetected     | No concerns  | No concerns    | Major concerns | No concerns    | -1* within-study bias, -2* heterogeneity                  | Very low          |
| EMDR vs WL            | Some concerns     | Undetected     | No concerns  | No concerns    | Major concerns | No concerns    | -1* within-study bias, -2* heterogeneity                  | Very low          |
| FT vs WL              | Some concerns     | Undetected     | No concerns  | Major concerns | No concerns    | No concerns    | -1* within-study bias, -2* imprecision                    | Very low          |
| G-nTF-CBT vs G-TF-CBT | Some concerns     | Undetected     | No concerns  | Major concerns | No concerns    | No concerns    | -1* within-study bias, -2* imprecision                    | Very low          |
| G-TF-CBT vs I-TF-CBT  | Some concerns     | Undetected     | No concerns  | Some concerns  | Some concerns  | No concerns    | -1* within-study bias, -1* imprecision, -1* heterogeneity | Very low          |
| G-TF-CBT vs NT        | Some concerns     | Undetected     | No concerns  | No concerns    | Major concerns | No concerns    | -1* within-study bias, -2* heterogeneity                  | Very low          |
| G-TF-CBT vs TAU       | Some concerns     | Undetected     | No concerns  | Some concerns  | Some concerns  | No concerns    | -1* within-study bias, -1*                                | Very low          |



| Comparison                   | Within-study bias | Reporting bias | Indirectness | Imprecision    | Heterogeneity  | Incoherence | Downgrading                                               | Confidence rating |
|------------------------------|-------------------|----------------|--------------|----------------|----------------|-------------|-----------------------------------------------------------|-------------------|
|                              |                   |                |              |                |                |             | imprecision, -1* heterogeneity                            |                   |
| <b>G-TF-CBT vs WL</b>        | Some concerns     | Undetected     | No concerns  | No concerns    | Major concerns | No concerns | -1* within-study bias, -2* heterogeneity                  | Very low          |
| <b>G-nTF-CBT vs WL</b>       | Some concerns     | Undetected     | No concerns  | No concerns    | Some concerns  | No concerns | -1* within-study bias, -1* heterogeneity                  | Low               |
| <b>I-nTF-CBT vs I-TF-CBT</b> | Some concerns     | Undetected     | No concerns  | Major concerns | No concerns    | No concerns | -1* within-study bias, -2* imprecision                    | Very low          |
| <b>I-TF-CBT vs NT</b>        | Some concerns     | Undetected     | No concerns  | No concerns    | Some concerns  | No concerns | -1* within-study bias, -1* heterogeneity                  | Low               |
| <b>I-TF-CBT vs P-TF-CBT</b>  | Major concerns    | Undetected     | No concerns  | Major concerns | No concerns    | No concerns | -2* within-study bias, -2* imprecision                    | Very low          |
| <b>I-TF-CBT vs PT</b>        | Major concerns    | Undetected     | No concerns  | Major concerns | No concerns    | No concerns | -2* within-study bias, -2* imprecision                    | Very low          |
| <b>I-TF-CBT vs ST</b>        | Some concerns     | Undetected     | No concerns  | No concerns    | Major concerns | No concerns | -1* within-study bias, -2* heterogeneity                  | Very low          |
| <b>I-TF-CBT vs TAU</b>       | Some concerns     | Undetected     | No concerns  | No concerns    | Major concerns | No concerns | -1* within-study bias, -2* heterogeneity                  | Very low          |
| <b>I-TF-CBT vs WL</b>        | Some concerns     | Undetected     | No concerns  | No concerns    | Some concerns  | No concerns | -1* within-study bias, -1* heterogeneity                  | Low               |
| <b>I-nTF-CBT vs NT</b>       | Some concerns     | Undetected     | No concerns  | Some concerns  | Some concerns  | No concerns | -1* within-study bias, -1* imprecision, -1* heterogeneity | Very low          |
| <b>I-nTF-CBT vs ST</b>       | Some concerns     | Undetected     | No concerns  | Major concerns | No concerns    | No concerns | -1* within-study bias, -2* imprecision                    | Very low          |
| <b>I-nTF-CBT vs TAU</b>      | Some concerns     | Undetected     | No concerns  | Major concerns | No concerns    | No concerns | -1* within-study bias, -2* imprecision                    | Very low          |
| <b>NT vs ST</b>              | Some concerns     | Undetected     | No concerns  | Major concerns | No concerns    | No concerns | -1* within-study bias, -2* imprecision                    | Very low          |
| <b>P-TF-CBT vs TAU</b>       | Major concerns    | Undetected     | No concerns  | Major concerns | No concerns    | No concerns | -2* within-study bias, -2* imprecision                    | Very low          |
| <b>ST vs WL</b>              | Some concerns     | Undetected     | No concerns  | Some concerns  | Some concerns  | No concerns | -1* within-study bias, -1* imprecision, -1* heterogeneity | Very low          |
| <b>BT vs CPT</b>             | Some concerns     | Undetected     | No concerns  | Major concerns | No concerns    | No concerns | -1* within-study bias, -2* imprecision                    | Very low          |

| Comparison              | Within-study bias | Reporting bias | Indirectness | Imprecision    | Heterogeneity | Incoherence | Downgrading                                               | Confidence rating |
|-------------------------|-------------------|----------------|--------------|----------------|---------------|-------------|-----------------------------------------------------------|-------------------|
| <b>BT vs CT</b>         | Some concerns     | Undetected     | No concerns  | Major concerns | No concerns   | No concerns | -1* within-study bias, -2* imprecision                    | Very low          |
| <b>BT vs EMDR</b>       | Some concerns     | Undetected     | No concerns  | Major concerns | No concerns   | No concerns | -1* within-study bias, -2* imprecision                    | Very low          |
| <b>BT vs FT</b>         | Some concerns     | Undetected     | No concerns  | Major concerns | No concerns   | No concerns | -1* within-study bias, -2* imprecision                    | Very low          |
| <b>BT vs G-TF-CBT</b>   | Some concerns     | Undetected     | No concerns  | Some concerns  | Some concerns | No concerns | -1* within-study bias, -1* imprecision, -1* heterogeneity | Very low          |
| <b>BT vs G-nTF-CBT</b>  | Some concerns     | Undetected     | No concerns  | Major concerns | No concerns   | No concerns | -1* within-study bias, -2* imprecision                    | Very low          |
| <b>BT vs I-TF-CBT</b>   | Some concerns     | Undetected     | No concerns  | Major concerns | No concerns   | No concerns | -1* within-study bias, -2* imprecision                    | Very low          |
| <b>BT vs I-nTF-CBT</b>  | Some concerns     | Undetected     | No concerns  | Major concerns | No concerns   | No concerns | -1* within-study bias, -2* imprecision                    | Very low          |
| <b>BT vs NT</b>         | Some concerns     | Undetected     | No concerns  | No concerns    | Some concerns | No concerns | -1* within-study bias, -1* heterogeneity                  | Low               |
| <b>BT vs P-TF-CBT</b>   | Some concerns     | Undetected     | No concerns  | Major concerns | No concerns   | No concerns | -1* within-study bias, -2* imprecision                    | Very low          |
| <b>BT vs PT</b>         | Some concerns     | Undetected     | No concerns  | Major concerns | No concerns   | No concerns | -1* within-study bias, -2* imprecision                    | Very low          |
| <b>CPT vs CT</b>        | Some concerns     | Undetected     | No concerns  | Major concerns | No concerns   | No concerns | -1* within-study bias, -2* imprecision                    | Very low          |
| <b>CPT vs DYN</b>       | Some concerns     | Undetected     | No concerns  | Major concerns | No concerns   | No concerns | -1* within-study bias, -2* imprecision                    | Very low          |
| <b>CPT vs EMDR</b>      | Some concerns     | Undetected     | No concerns  | Some concerns  | Some concerns | No concerns | -1* within-study bias, -1* imprecision, -1* heterogeneity | Very low          |
| <b>CPT vs FT</b>        | Some concerns     | Undetected     | No concerns  | Some concerns  | Some concerns | No concerns | -1* within-study bias, -1* imprecision, -1* heterogeneity | Very low          |
| <b>CPT vs G-TF-CBT</b>  | Some concerns     | Undetected     | No concerns  | Some concerns  | Some concerns | No concerns | -1* within-study bias, -1* imprecision, -1* heterogeneity | Very low          |
| <b>CPT vs G-nTF-CBT</b> | Some concerns     | Undetected     | No concerns  | Major concerns | No concerns   | No concerns | -1* within-study bias, -2* imprecision                    | Very low          |
| <b>CPT vs I-TF-CBT</b>  | Some concerns     | Undetected     | No concerns  | Major concerns | No concerns   | No concerns | -1* within-study bias, -2*                                | Very low          |

| Comparison              | Within-study bias | Reporting bias | Indirectness | Imprecision    | Heterogeneity | Incoherence | Downgrading                                               | Confidence rating |
|-------------------------|-------------------|----------------|--------------|----------------|---------------|-------------|-----------------------------------------------------------|-------------------|
|                         |                   |                |              |                |               |             | imprecision                                               |                   |
| <b>CPT vs I-nTF-CBT</b> | Some concerns     | Undetected     | No concerns  | Some concerns  | Some concerns | No concerns | -1* within-study bias, -1* imprecision, -1* heterogeneity | Very low          |
| <b>CPT vs NT</b>        | Some concerns     | Undetected     | No concerns  | No concerns    | No concerns   | No concerns | -1* within-study bias                                     | Moderate          |
| <b>CPT vs P-TF-CBT</b>  | Some concerns     | Undetected     | No concerns  | Major concerns | No concerns   | No concerns | -1* within-study bias, -2* imprecision                    | Very low          |
| <b>CPT vs PT</b>        | Some concerns     | Undetected     | No concerns  | Major concerns | No concerns   | No concerns | -1* within-study bias, -2* imprecision                    | Very low          |
| <b>CPT vs SM</b>        | Some concerns     | Undetected     | No concerns  | Major concerns | No concerns   | No concerns | -1* within-study bias, -2* imprecision                    | Very low          |
| <b>CPT vs ST</b>        | Some concerns     | Undetected     | No concerns  | No concerns    | Some concerns | No concerns | -1* within-study bias, -1* heterogeneity                  | Low               |
| <b>CPT vs TAU</b>       | Some concerns     | Undetected     | No concerns  | No concerns    | Some concerns | No concerns | -1* within-study bias, -1* heterogeneity                  | Low               |
| <b>CT vs DYN</b>        | Some concerns     | Undetected     | No concerns  | Major concerns | No concerns   | No concerns | -1* within-study bias, -2* imprecision                    | Very low          |
| <b>CT vs EMDR</b>       | Some concerns     | Undetected     | No concerns  | Major concerns | No concerns   | No concerns | -1* within-study bias, -2* imprecision                    | Very low          |
| <b>CT vs FT</b>         | Some concerns     | Undetected     | No concerns  | Major concerns | No concerns   | No concerns | -1* within-study bias, -2* imprecision                    | Very low          |
| <b>CT vs G-TF-CBT</b>   | Some concerns     | Undetected     | No concerns  | Major concerns | No concerns   | No concerns | -1* within-study bias, -2* imprecision                    | Very low          |
| <b>CT vs G-nTF-CBT</b>  | Some concerns     | Undetected     | No concerns  | Major concerns | No concerns   | No concerns | -1* within-study bias, -2* imprecision                    | Very low          |
| <b>CT vs I-nTF-CBT</b>  | Some concerns     | Undetected     | No concerns  | Major concerns | No concerns   | No concerns | -1* within-study bias, -2* imprecision                    | Very low          |
| <b>CT vs NT</b>         | Some concerns     | Undetected     | No concerns  | No concerns    | Some concerns | No concerns | -1* within-study bias, -1* heterogeneity                  | Low               |
| <b>CT vs P-TF-CBT</b>   | Some concerns     | Undetected     | No concerns  | Major concerns | No concerns   | No concerns | -1* within-study bias, -2* imprecision                    | Very low          |
| <b>CT vs PT</b>         | Some concerns     | Undetected     | No concerns  | Major concerns | No concerns   | No concerns | -1* within-study bias, -2* imprecision                    | Very low          |

| Comparison              | Within-study bias | Reporting bias | Indirectness | Imprecision    | Heterogeneity  | Incoherence | Downgrading                                               | Confidence rating |
|-------------------------|-------------------|----------------|--------------|----------------|----------------|-------------|-----------------------------------------------------------|-------------------|
| <b>CT vs SM</b>         | Some concerns     | Undetected     | No concerns  | Major concerns | No concerns    | No concerns | -1* within-study bias, -2* imprecision                    | Very low          |
| <b>CT vs ST</b>         | Some concerns     | Undetected     | No concerns  | Some concerns  | Some concerns  | No concerns | -1* within-study bias, -1* imprecision, -1* heterogeneity | Very low          |
| <b>CT vs TAU</b>        | Some concerns     | Undetected     | No concerns  | No concerns    | Major concerns | No concerns | -1* within-study bias, -2* heterogeneity                  | Very low          |
| <b>DYN vs EMDR</b>      | Some concerns     | Undetected     | No concerns  | Major concerns | No concerns    | No concerns | -1* within-study bias, -2* imprecision                    | Very low          |
| <b>DYN vs FT</b>        | Some concerns     | Undetected     | No concerns  | Major concerns | No concerns    | No concerns | -1* within-study bias, -2* imprecision                    | Very low          |
| <b>DYN vs G-TF-CBT</b>  | Some concerns     | Undetected     | No concerns  | Major concerns | No concerns    | No concerns | -1* within-study bias, -2* imprecision                    | Very low          |
| <b>DYN vs G-nTF-CBT</b> | Some concerns     | Undetected     | No concerns  | Major concerns | No concerns    | No concerns | -1* within-study bias, -2* imprecision                    | Very low          |
| <b>DYN vs I-TF-CBT</b>  | Some concerns     | Undetected     | No concerns  | Major concerns | No concerns    | No concerns | -1* within-study bias, -2* imprecision                    | Very low          |
| <b>DYN vs I-nTF-CBT</b> | Some concerns     | Undetected     | No concerns  | Major concerns | No concerns    | No concerns | -1* within-study bias, -2* imprecision                    | Very low          |
| <b>DYN vs NT</b>        | Some concerns     | Undetected     | No concerns  | Major concerns | No concerns    | No concerns | -1* within-study bias, -2* imprecision                    | Very low          |
| <b>DYN vs P-TF-CBT</b>  | Some concerns     | Undetected     | No concerns  | Major concerns | No concerns    | No concerns | -1* within-study bias, -2* imprecision                    | Very low          |
| <b>DYN vs PT</b>        | Some concerns     | Undetected     | No concerns  | Major concerns | No concerns    | No concerns | -1* within-study bias, -2* imprecision                    | Very low          |
| <b>DYN vs SM</b>        | Some concerns     | Undetected     | No concerns  | Major concerns | No concerns    | No concerns | -1* within-study bias, -2* imprecision                    | Very low          |
| <b>DYN vs ST</b>        | Some concerns     | Undetected     | No concerns  | Major concerns | No concerns    | No concerns | -1* within-study bias, -2* imprecision                    | Very low          |
| <b>DYN vs TAU</b>       | Some concerns     | Undetected     | No concerns  | Major concerns | No concerns    | No concerns | -1* within-study bias, -2* imprecision                    | Very low          |
| <b>DYN vs WL</b>        | Some concerns     | Undetected     | No concerns  | Major concerns | No concerns    | No concerns | -1* within-study bias, -2* imprecision                    | Very low          |
| <b>EMDR vs FT</b>       | Some concerns     | Undetected     | No concerns  | Major concerns | No concerns    | No concerns | -1* within-study bias, -2*                                | Very low          |

| Comparison               | Within-study bias | Reporting bias | Indirectness | Imprecision    | Heterogeneity | Incoherence | Downgrading                                               | Confidence rating |
|--------------------------|-------------------|----------------|--------------|----------------|---------------|-------------|-----------------------------------------------------------|-------------------|
|                          |                   |                |              |                |               |             | imprecision                                               |                   |
| <b>EMDR vs G-TF-CBT</b>  | Some concerns     | Undetected     | No concerns  | Major concerns | No concerns   | No concerns | -1* within-study bias, -2* imprecision                    | Very low          |
| <b>EMDR vs G-nTF-CBT</b> | Some concerns     | Undetected     | No concerns  | Major concerns | No concerns   | No concerns | -1* within-study bias, -2* imprecision                    | Very low          |
| <b>EMDR vs I-nTF-CBT</b> | Some concerns     | Undetected     | No concerns  | Major concerns | No concerns   | No concerns | -1* within-study bias, -2* imprecision                    | Very low          |
| <b>EMDR vs P-TF-CBT</b>  | Some concerns     | Undetected     | No concerns  | Major concerns | No concerns   | No concerns | -1* within-study bias, -2* imprecision                    | Very low          |
| <b>EMDR vs PT</b>        | Some concerns     | Undetected     | No concerns  | Major concerns | No concerns   | No concerns | -1* within-study bias, -2* imprecision                    | Very low          |
| <b>EMDR vs SM</b>        | Some concerns     | Undetected     | No concerns  | Major concerns | No concerns   | No concerns | -1* within-study bias, -2* imprecision                    | Very low          |
| <b>EMDR vs ST</b>        | Some concerns     | Undetected     | No concerns  | Some concerns  | Some concerns | No concerns | -1* within-study bias, -1* imprecision, -1* heterogeneity | Very low          |
| <b>FT vs G-TF-CBT</b>    | Some concerns     | Undetected     | No concerns  | Major concerns | No concerns   | No concerns | -1* within-study bias, -2* imprecision                    | Very low          |
| <b>FT vs G-nTF-CBT</b>   | Some concerns     | Undetected     | No concerns  | Major concerns | No concerns   | No concerns | -1* within-study bias, -2* imprecision                    | Very low          |
| <b>FT vs I-TF-CBT</b>    | Some concerns     | Undetected     | No concerns  | Major concerns | No concerns   | No concerns | -1* within-study bias, -2* imprecision                    | Very low          |
| <b>FT vs I-nTF-CBT</b>   | Some concerns     | Undetected     | No concerns  | Major concerns | No concerns   | No concerns | -1* within-study bias, -2* imprecision                    | Very low          |
| <b>FT vs NT</b>          | Some concerns     | Undetected     | No concerns  | Major concerns | No concerns   | No concerns | -1* within-study bias, -2* imprecision                    | Very low          |
| <b>FT vs P-TF-CBT</b>    | Some concerns     | Undetected     | No concerns  | Major concerns | No concerns   | No concerns | -1* within-study bias, -2* imprecision                    | Very low          |
| <b>FT vs PT</b>          | Some concerns     | Undetected     | No concerns  | Major concerns | No concerns   | No concerns | -1* within-study bias, -2* imprecision                    | Very low          |
| <b>FT vs SM</b>          | Some concerns     | Undetected     | No concerns  | Major concerns | No concerns   | No concerns | -1* within-study bias, -2* imprecision                    | Very low          |
| <b>FT vs ST</b>          | Some concerns     | Undetected     | No concerns  | Major concerns | No concerns   | No concerns | -1* within-study bias, -2* imprecision                    | Very low          |

| Comparison                    | Within-study bias | Reporting bias | Indirectness | Imprecision    | Heterogeneity  | Incoherence | Downgrading                                               | Confidence rating |
|-------------------------------|-------------------|----------------|--------------|----------------|----------------|-------------|-----------------------------------------------------------|-------------------|
| <b>FT vs TAU</b>              | Some concerns     | Undetected     | No concerns  | Major concerns | No concerns    | No concerns | -1* within-study bias, -2* imprecision                    | Very low          |
| <b>G-TF-CBT vs I-nTF-CBT</b>  | Some concerns     | Undetected     | No concerns  | Major concerns | No concerns    | No concerns | -1* within-study bias, -2* imprecision                    | Very low          |
| <b>G-TF-CBT vs P-TF-CBT</b>   | Some concerns     | Undetected     | No concerns  | Major concerns | No concerns    | No concerns | -1* within-study bias, -2* imprecision                    | Very low          |
| <b>G-TF-CBT vs PT</b>         | Some concerns     | Undetected     | No concerns  | Major concerns | No concerns    | No concerns | -1* within-study bias, -2* imprecision                    | Very low          |
| <b>G-TF-CBT vs SM</b>         | Some concerns     | Undetected     | No concerns  | Major concerns | No concerns    | No concerns | -1* within-study bias, -2* imprecision                    | Very low          |
| <b>G-TF-CBT vs ST</b>         | Some concerns     | Undetected     | No concerns  | Some concerns  | Some concerns  | No concerns | -1* within-study bias, -1* imprecision, -1* heterogeneity | Very low          |
| <b>G-nTF-CBT vs I-TF-CBT</b>  | Some concerns     | Undetected     | No concerns  | Major concerns | No concerns    | No concerns | -1* within-study bias, -2* imprecision                    | Very low          |
| <b>G-nTF-CBT vs I-nTF-CBT</b> | Some concerns     | Undetected     | No concerns  | Major concerns | No concerns    | No concerns | -1* within-study bias, -2* imprecision                    | Very low          |
| <b>G-nTF-CBT vs NT</b>        | Some concerns     | Undetected     | No concerns  | No concerns    | Some concerns  | No concerns | -1* within-study bias, -1* heterogeneity                  | Low               |
| <b>G-nTF-CBT vs P-TF-CBT</b>  | Some concerns     | Undetected     | No concerns  | Major concerns | No concerns    | No concerns | -1* within-study bias, -2* imprecision                    | Very low          |
| <b>G-nTF-CBT vs PT</b>        | Some concerns     | Undetected     | No concerns  | Major concerns | No concerns    | No concerns | -1* within-study bias, -2* imprecision                    | Very low          |
| <b>G-nTF-CBT vs SM</b>        | Some concerns     | Undetected     | No concerns  | Major concerns | No concerns    | No concerns | -1* within-study bias, -2* imprecision                    | Very low          |
| <b>G-nTF-CBT vs ST</b>        | Some concerns     | Undetected     | No concerns  | Some concerns  | Some concerns  | No concerns | -1* within-study bias, -1* imprecision, -1* heterogeneity | Very low          |
| <b>G-nTF-CBT vs TAU</b>       | Some concerns     | Undetected     | No concerns  | No concerns    | Major concerns | No concerns | -1* within-study bias, -2* heterogeneity                  | Very low          |
| <b>I-TF-CBT vs SM</b>         | Some concerns     | Undetected     | No concerns  | Major concerns | No concerns    | No concerns | -1* within-study bias, -2* imprecision                    | Very low          |
| <b>I-nTF-CBT vs P-TF-CBT</b>  | Major concerns    | Undetected     | No concerns  | Major concerns | No concerns    | No concerns | -2* within-study bias, -2* imprecision                    | Very low          |
| <b>I-nTF-CBT vs PT</b>        | Major concerns    | Undetected     | No concerns  | Major concerns | No concerns    | No concerns | -2* within-study bias, -2*                                | Very low          |

| Comparison             | Within-study bias | Reporting bias | Indirectness | Imprecision    | Heterogeneity | Incoherence | Downgrading                                               | Confidence rating |
|------------------------|-------------------|----------------|--------------|----------------|---------------|-------------|-----------------------------------------------------------|-------------------|
|                        |                   |                |              |                |               |             | imprecision                                               |                   |
| <b>I-nTF-CBT vs SM</b> | Some concerns     | Undetected     | No concerns  | Major concerns | No concerns   | No concerns | -1* within-study bias, -2* imprecision                    | Very low          |
| <b>I-nTF-CBT vs WL</b> | Some concerns     | Undetected     | No concerns  | Some concerns  | Some concerns | No concerns | -1* within-study bias, -1* imprecision, -1* heterogeneity | Very low          |
| <b>NT vs P-TF-CBT</b>  | Some concerns     | Undetected     | No concerns  | Major concerns | No concerns   | No concerns | -1* within-study bias, -2* imprecision                    | Very low          |
| <b>NT vs PT</b>        | Some concerns     | Undetected     | No concerns  | Some concerns  | Some concerns | No concerns | -1* within-study bias, -1* imprecision, -1* heterogeneity | Very low          |
| <b>NT vs SM</b>        | Some concerns     | Undetected     | No concerns  | Major concerns | No concerns   | No concerns | -1* within-study bias, -2* imprecision                    | Very low          |
| <b>NT vs TAU</b>       | Some concerns     | Undetected     | No concerns  | Major concerns | No concerns   | No concerns | -1* within-study bias, -2* imprecision                    | Very low          |
| <b>NT vs WL</b>        | Some concerns     | Undetected     | No concerns  | Major concerns | No concerns   | No concerns | -1* within-study bias, -2* imprecision                    | Very low          |
| <b>PT vs P-TF-CBT</b>  | Major concerns    | Undetected     | No concerns  | Major concerns | No concerns   | No concerns | -2* within-study bias, -2* imprecision                    | Very low          |
| <b>P-TF-CBT vs SM</b>  | Some concerns     | Undetected     | No concerns  | Major concerns | No concerns   | No concerns | -1* within-study bias, -2* imprecision                    | Very low          |
| <b>P-TF-CBT vs ST</b>  | Some concerns     | Undetected     | No concerns  | Major concerns | No concerns   | No concerns | -1* within-study bias, -2* imprecision                    | Very low          |
| <b>P-TF-CBT vs WL</b>  | Some concerns     | Undetected     | No concerns  | Major concerns | No concerns   | No concerns | -1* within-study bias, -2* imprecision                    | Very low          |
| <b>PT vs SM</b>        | Some concerns     | Undetected     | No concerns  | Major concerns | No concerns   | No concerns | -1* within-study bias, -2* imprecision                    | Very low          |
| <b>PT vs ST</b>        | Some concerns     | Undetected     | No concerns  | Major concerns | No concerns   | No concerns | -1* within-study bias, -2* imprecision                    | Very low          |
| <b>PT vs TAU</b>       | Some concerns     | Undetected     | No concerns  | Major concerns | No concerns   | No concerns | -1* within-study bias, -2* imprecision                    | Very low          |
| <b>PT vs WL</b>        | Some concerns     | Undetected     | No concerns  | Some concerns  | Some concerns | No concerns | -1* within-study bias, -1* imprecision, -1* heterogeneity | Very low          |
| <b>SM vs ST</b>        | Some concerns     | Undetected     | No concerns  | Major concerns | No concerns   | No concerns | -1* within-study bias, -2* imprecision                    | Very low          |

| Comparison       | Within-study bias | Reporting bias | Indirectness | Imprecision    | Heterogeneity | Incoherence | Downgrading                            | Confidence rating |
|------------------|-------------------|----------------|--------------|----------------|---------------|-------------|----------------------------------------|-------------------|
| <b>SM vs TAU</b> | Some concerns     | Undetected     | No concerns  | Major concerns | No concerns   | No concerns | -1* within-study bias, -2* imprecision | Very low          |
| <b>SM vs WL</b>  | Some concerns     | Undetected     | No concerns  | Major concerns | No concerns   | No concerns | -1* within-study bias, -2* imprecision | Very low          |
| <b>ST vs TAU</b> | Some concerns     | Undetected     | No concerns  | Major concerns | No concerns   | No concerns | -1* within-study bias, -2* imprecision | Very low          |
| <b>TAU vs WL</b> | Some concerns     | Undetected     | No concerns  | Major concerns | No concerns   | No concerns | -1* within-study bias, -2* imprecision | Very low          |

BT= Behavioral therapy. CPT= Cognitive processing therapy. CT= Cognitive therapy. DYN= Psychodynamic therapy. EMDR= Eye movement desensitization and reprocessing. G-TF-CBT= Group trauma-focused cognitive behavioral therapy. G-nTF-CBT= Group non-trauma-focused cognitive behavioral therapy. I/G-TF-CBT= Individual/group trauma-focused cognitive behavioral therapy. I/G-nTF-CBT= Individual/group non-trauma-focused cognitive behavioral therapy. I-TF-CBT= Individual trauma-focused cognitive behavioral therapy. I-nTF-CBT= Individual non-trauma-focused cognitive behavioral therapy. NT= No treatment. PT= Play therapy. SM= Stress management. ST= Supportive therapy. TAU= Treatment as usual. WL= Waitlist.



**b. The confidence in SMD for efficacy at follow-up for all comparisons by CINeMA approach**

| Comparison                   | Within-study bias | Reporting bias | Indirectness  | Imprecision    | Heterogeneity | Incoherence | Downgrading                                               | Confidence rating |
|------------------------------|-------------------|----------------|---------------|----------------|---------------|-------------|-----------------------------------------------------------|-------------------|
| <b>BT vs DYN</b>             | Some concerns     | Undetected     | No concerns   | Major concerns | No concerns   | No concerns | -1* within-study bias, -2* imprecision                    | Very low          |
| <b>BT vs SM</b>              | Some concerns     | Undetected     | No concerns   | Major concerns | No concerns   | No concerns | -1* within-study bias, -2* imprecision                    | Very low          |
| <b>BT vs ST</b>              | Some concerns     | Undetected     | No concerns   | No concerns    | No concerns   | No concerns | -1* within-study bias                                     | Moderate          |
| <b>BT vs WL</b>              | Some concerns     | Undetected     | No concerns   | No concerns    | No concerns   | No concerns | -1* within-study bias                                     | Moderate          |
| <b>CPT vs WL</b>             | No concerns       | Undetected     | No concerns   | No concerns    | No concerns   | No concerns | No downgrade                                              | High              |
| <b>CT vs I-TF-CBT</b>        | Some concerns     | Undetected     | No concerns   | Major concerns | No concerns   | No concerns | -1* within-study bias, -2* imprecision                    | Very low          |
| <b>EMDR vs I-TF-CBT</b>      | No concerns       | Undetected     | Some concerns | Major concerns | No concerns   | No concerns | -1* indirectness, -2* imprecision                         | Very low          |
| <b>EMDR vs WL</b>            | Some concerns     | Undetected     | No concerns   | No concerns    | Some concerns | No concerns | -1* within-study bias, -1* heterogeneity                  | Low               |
| <b>G-nTF-CBT vs G-TF-CBT</b> | Some concerns     | Undetected     | No concerns   | Major concerns | No concerns   | No concerns | -1* within-study bias, -2* imprecision                    | Very low          |
| <b>G-TF-CBT vs I-TF-CBT</b>  | Some concerns     | Undetected     | No concerns   | Some concerns  | Some concerns | No concerns | -1* within-study bias, -1* imprecision, -1* heterogeneity | Very low          |
| <b>G-TF-CBT vs NT</b>        | Some concerns     | Undetected     | No concerns   | No concerns    | Some concerns | No concerns | -1* within-study bias, -1* heterogeneity                  | Low               |
| <b>G-TF-CBT vs TAU</b>       | No concerns       | Undetected     | No concerns   | No concerns    | Some concerns | No concerns | -1* heterogeneity                                         | Moderate          |
| <b>G-TF-CBT vs WL</b>        | Some concerns     | Undetected     | No concerns   | No concerns    | Some concerns | No concerns | -1* within-study bias, -1* heterogeneity                  | Low               |
| <b>G-nTF-CBT vs WL</b>       | Some concerns     | Undetected     | No concerns   | Some concerns  | Some concerns | No concerns | -1* within-study bias, -1* imprecision, -1* heterogeneity | Very low          |
| <b>I-TF-CBT vs ST</b>        | Some concerns     | Undetected     | No concerns   | No concerns    | Some concerns | No concerns | -1* within-study bias, -1* heterogeneity                  | Low               |
| <b>I-TF-CBT vs TAU</b>       | Some concerns     | Undetected     | No concerns   | No concerns    | No concerns   | No concerns | -1* within-study bias                                     | Moderate          |
| <b>I-TF-CBT vs WL</b>        | Some concerns     | Undetected     | No concerns   | No concerns    | Some concerns | No concerns | -1* within-study bias,                                    | Low               |

| Comparison              | Within-study bias | Reporting bias | Indirectness | Imprecision    | Heterogeneity | Incoherence | Downgrading                                               | Confidence rating |
|-------------------------|-------------------|----------------|--------------|----------------|---------------|-------------|-----------------------------------------------------------|-------------------|
|                         |                   |                |              |                |               |             | -1* heterogeneity                                         |                   |
| <b>I-nTF-CBT vs NT</b>  | Some concerns     | Undetected     | No concerns  | No concerns    | Some concerns | No concerns | -1* within-study bias, -1* heterogeneity                  | Low               |
| <b>I-nTF-CBT vs ST</b>  | Some concerns     | Undetected     | No concerns  | Major concerns | No concerns   | No concerns | -1* within-study bias, -2* imprecision                    | Very low          |
| <b>I-nTF-CBT vs TAU</b> | Some concerns     | Undetected     | No concerns  | Some concerns  | Some concerns | No concerns | -1* within-study bias, -1* imprecision, -1* heterogeneity | Very low          |
| <b>NT vs ST</b>         | Some concerns     | Undetected     | No concerns  | Major concerns | No concerns   | No concerns | -1* within-study bias, -2* imprecision                    | Very low          |
| <b>BT vs CPT</b>        | Some concerns     | Undetected     | No concerns  | Major concerns | No concerns   | No concerns | -1* within-study bias, -2* imprecision                    | Very low          |
| <b>BT vs CT</b>         | Some concerns     | Undetected     | No concerns  | Major concerns | No concerns   | No concerns | -1* within-study bias, -2* imprecision                    | Very low          |
| <b>BT vs EMDR</b>       | Some concerns     | Undetected     | No concerns  | Some concerns  | Some concerns | No concerns | -1* within-study bias, -1* imprecision, -1* heterogeneity | Very low          |
| <b>BT vs G-TF-CBT</b>   | Some concerns     | Undetected     | No concerns  | No concerns    | No concerns   | No concerns | -1* within-study bias                                     | Moderate          |
| <b>BT vs G-nTF-CBT</b>  | Some concerns     | Undetected     | No concerns  | No concerns    | No concerns   | No concerns | -1* within-study bias                                     | Moderate          |
| <b>BT vs I-TF-CBT</b>   | Some concerns     | Undetected     | No concerns  | No concerns    | No concerns   | No concerns | -1* within-study bias                                     | Moderate          |
| <b>BT vs I-nTF-CBT</b>  | Some concerns     | Undetected     | No concerns  | Some concerns  | No concerns   | No concerns | -1* within-study bias, -1* imprecision                    | Low               |
| <b>BT vs NT</b>         | Some concerns     | Undetected     | No concerns  | No concerns    | No concerns   | No concerns | -1* within-study bias                                     | Moderate          |
| <b>BT vs TAU</b>        | Some concerns     | Undetected     | No concerns  | No concerns    | No concerns   | No concerns | -1* within-study bias                                     | Moderate          |
| <b>CPT vs CT</b>        | Some concerns     | Undetected     | No concerns  | No concerns    | Some concerns | No concerns | -1* within-study bias, -1* heterogeneity                  | Low               |
| <b>CPT vs DYN</b>       | Some concerns     | Undetected     | No concerns  | Some concerns  | No concerns   | No concerns | -1* within-study bias, -1* imprecision                    | Low               |
| <b>CPT vs EMDR</b>      | No concerns       | Undetected     | No concerns  | No concerns    | No concerns   | No concerns | No downgrade                                              | High              |
| <b>CPT vs G-TF-CBT</b>  | Some concerns     | Undetected     | No concerns  | No concerns    | No concerns   | No concerns | -1* within-study bias                                     | Moderate          |
| <b>CPT vs G-nTF-CBT</b> | Some concerns     | Undetected     | No concerns  | No concerns    | No concerns   | No concerns | -1* within-study bias                                     | Moderate          |

| Comparison              | Within-study bias | Reporting bias | Indirectness | Imprecision    | Heterogeneity | Incoherence | Downgrading                                               | Confidence rating |
|-------------------------|-------------------|----------------|--------------|----------------|---------------|-------------|-----------------------------------------------------------|-------------------|
| <b>CPT vs I-TF-CBT</b>  | Some concerns     | Undetected     | No concerns  | No concerns    | No concerns   | No concerns | -1* within-study bias                                     | Moderate          |
| <b>CPT vs I-nTF-CBT</b> | Some concerns     | Undetected     | No concerns  | No concerns    | No concerns   | No concerns | -1* within-study bias                                     | Moderate          |
| <b>CPT vs NT</b>        | Some concerns     | Undetected     | No concerns  | No concerns    | No concerns   | No concerns | -1* within-study bias                                     | Moderate          |
| <b>CPT vs SM</b>        | Some concerns     | Undetected     | No concerns  | Major concerns | No concerns   | No concerns | -1* within-study bias, -2* imprecision                    | Very low          |
| <b>CPT vs ST</b>        | Some concerns     | Undetected     | No concerns  | No concerns    | No concerns   | No concerns | -1* within-study bias                                     | Moderate          |
| <b>CPT vs TAU</b>       | No concerns       | Undetected     | No concerns  | No concerns    | No concerns   | No concerns | No downgrade                                              | High              |
| <b>CT vs DYN</b>        | Some concerns     | Undetected     | No concerns  | Major concerns | No concerns   | No concerns | -1* within-study bias, -2* imprecision                    | Very low          |
| <b>CT vs EMDR</b>       | Some concerns     | Undetected     | No concerns  | Major concerns | No concerns   | No concerns | -1* within-study bias, -2* imprecision                    | Very low          |
| <b>CT vs G-TF-CBT</b>   | Some concerns     | Undetected     | No concerns  | Major concerns | No concerns   | No concerns | -1* within-study bias, -2* imprecision                    | Very low          |
| <b>CT vs G-nTF-CBT</b>  | Some concerns     | Undetected     | No concerns  | Major concerns | No concerns   | No concerns | -1* within-study bias, -2* imprecision                    | Very low          |
| <b>CT vs I-nTF-CBT</b>  | Some concerns     | Undetected     | No concerns  | Major concerns | No concerns   | No concerns | -1* within-study bias, -2* imprecision                    | Very low          |
| <b>CT vs NT</b>         | Some concerns     | Undetected     | No concerns  | No concerns    | Some concerns | No concerns | -1* within-study bias, -1* heterogeneity                  | Low               |
| <b>CT vs SM</b>         | Some concerns     | Undetected     | No concerns  | Major concerns | No concerns   | No concerns | -1* within-study bias, -2* imprecision                    | Very low          |
| <b>CT vs ST</b>         | Some concerns     | Undetected     | No concerns  | Major concerns | No concerns   | No concerns | -1* within-study bias, -2* imprecision                    | Very low          |
| <b>CT vs TAU</b>        | Some concerns     | Undetected     | No concerns  | Some concerns  | Some concerns | No concerns | -1* within-study bias, -1* imprecision, -1* heterogeneity | Very low          |
| <b>CT vs WL</b>         | Some concerns     | Undetected     | No concerns  | Major concerns | No concerns   | No concerns | -1* within-study bias, -2* imprecision                    | Very low          |
| <b>DYN vs EMDR</b>      | Some concerns     | Undetected     | No concerns  | Major concerns | No concerns   | No concerns | -1* within-study bias, -2* imprecision                    | Very low          |
| <b>DYN vs G-TF-CBT</b>  | Some concerns     | Undetected     | No concerns  | Major concerns | No concerns   | No concerns | -1* within-study bias, -2* imprecision                    | Very low          |

| Comparison                   | Within-study bias | Reporting bias | Indirectness | Imprecision    | Heterogeneity | Incoherence | Downgrading                                               | Confidence rating |
|------------------------------|-------------------|----------------|--------------|----------------|---------------|-------------|-----------------------------------------------------------|-------------------|
| <b>DYN vs G-nTF-CBT</b>      | Some concerns     | Undetected     | No concerns  | Major concerns | No concerns   | No concerns | -1* within-study bias, -2* imprecision                    | Very low          |
| <b>DYN vs I-TF-CBT</b>       | Some concerns     | Undetected     | No concerns  | Major concerns | No concerns   | No concerns | -1* within-study bias, -2* imprecision                    | Very low          |
| <b>DYN vs I-nTF-CBT</b>      | Some concerns     | Undetected     | No concerns  | Major concerns | No concerns   | No concerns | -1* within-study bias, -2* imprecision                    | Very low          |
| <b>DYN vs NT</b>             | Some concerns     | Undetected     | No concerns  | No concerns    | Some concerns | No concerns | -1* within-study bias, -1* heterogeneity                  | Low               |
| <b>DYN vs SM</b>             | Some concerns     | Undetected     | No concerns  | Major concerns | No concerns   | No concerns | -1* within-study bias, -2* imprecision                    | Very low          |
| <b>DYN vs ST</b>             | Some concerns     | Undetected     | No concerns  | Some concerns  | Some concerns | No concerns | -1* within-study bias, -1* imprecision, -1* heterogeneity | Very low          |
| <b>DYN vs TAU</b>            | Some concerns     | Undetected     | No concerns  | Some concerns  | Some concerns | No concerns | -1* within-study bias, -1* imprecision, -1* heterogeneity | Very low          |
| <b>DYN vs WL</b>             | Some concerns     | Undetected     | No concerns  | Major concerns | No concerns   | No concerns | -1* within-study bias, -2* imprecision                    | Very low          |
| <b>EMDR vs G-TF-CBT</b>      | Some concerns     | Undetected     | No concerns  | Major concerns | No concerns   | No concerns | -1* within-study bias, -2* imprecision                    | Very low          |
| <b>EMDR vs G-nTF-CBT</b>     | Some concerns     | Undetected     | No concerns  | Major concerns | No concerns   | No concerns | -1* within-study bias, -2* imprecision                    | Very low          |
| <b>EMDR vs I-nTF-CBT</b>     | Some concerns     | Undetected     | No concerns  | Major concerns | No concerns   | No concerns | -1* within-study bias, -2* imprecision                    | Very low          |
| <b>EMDR vs NT</b>            | Some concerns     | Undetected     | No concerns  | No concerns    | No concerns   | No concerns | -1* within-study bias                                     | Moderate          |
| <b>EMDR vs SM</b>            | Some concerns     | Undetected     | No concerns  | Major concerns | No concerns   | No concerns | -1* within-study bias, -2* imprecision                    | Very low          |
| <b>EMDR vs ST</b>            | Some concerns     | Undetected     | No concerns  | No concerns    | Some concerns | No concerns | -1* within-study bias, -1* heterogeneity                  | Low               |
| <b>EMDR vs TAU</b>           | Some concerns     | Undetected     | No concerns  | No concerns    | No concerns   | No concerns | -1* within-study bias                                     | Moderate          |
| <b>G-TF-CBT vs I-nTF-CBT</b> | Some concerns     | Undetected     | No concerns  | Major concerns | No concerns   | No concerns | -1* within-study bias, -2* imprecision                    | Very low          |

| Comparison                    | Within-study bias | Reporting bias | Indirectness | Imprecision    | Heterogeneity | Incoherence | Downgrading                                               | Confidence rating |
|-------------------------------|-------------------|----------------|--------------|----------------|---------------|-------------|-----------------------------------------------------------|-------------------|
| <b>G-TF-CBT vs SM</b>         | Some concerns     | Undetected     | No concerns  | No concerns    | No concerns   | No concerns | -1* within-study bias                                     | Moderate          |
| <b>G-TF-CBT vs ST</b>         | Some concerns     | Undetected     | No concerns  | Some concerns  | Some concerns | No concerns | -1* within-study bias, -1* imprecision, -1* heterogeneity | Very low          |
| <b>G-nTF-CBT vs I-TF-CBT</b>  | Some concerns     | Undetected     | No concerns  | Major concerns | No concerns   | No concerns | -1* within-study bias, -2* imprecision                    | Very low          |
| <b>G-nTF-CBT vs I-nTF-CBT</b> | Some concerns     | Undetected     | No concerns  | Major concerns | No concerns   | No concerns | -1* within-study bias, -2* imprecision                    | Very low          |
| <b>G-nTF-CBT vs NT</b>        | Some concerns     | Undetected     | No concerns  | Some concerns  | No concerns   | No concerns | -1* within-study bias, -1* imprecision                    | Low               |
| <b>G-nTF-CBT vs SM</b>        | Some concerns     | Undetected     | No concerns  | No concerns    | Some concerns | No concerns | -1* within-study bias, -1* heterogeneity                  | Low               |
| <b>G-nTF-CBT vs ST</b>        | Some concerns     | Undetected     | No concerns  | Major concerns | No concerns   | No concerns | -1* within-study bias, -2* imprecision                    | Very low          |
| <b>G-nTF-CBT vs TAU</b>       | Some concerns     | Undetected     | No concerns  | Some concerns  | Some concerns | No concerns | -1* within-study bias, -1* imprecision, -1* heterogeneity | Very low          |
| <b>I-nTF-CBT vs I-TF-CBT</b>  | Some concerns     | Undetected     | No concerns  | Major concerns | No concerns   | No concerns | -1* within-study bias, -2* imprecision                    | Very low          |
| <b>I-TF-CBT vs NT</b>         | Some concerns     | Undetected     | No concerns  | No concerns    | No concerns   | No concerns | -1* within-study bias,                                    | Moderate          |
| <b>I-TF-CBT vs SM</b>         | Some concerns     | Undetected     | No concerns  | No concerns    | Some concerns | No concerns | -1* within-study bias, -1* heterogeneity                  | Low               |
| <b>I-nTF-CBT vs SM</b>        | Some concerns     | Undetected     | No concerns  | Some concerns  | Some concerns | No concerns | -1* within-study bias, -1* imprecision, -1* heterogeneity | Very low          |
| <b>I-nTF-CBT vs WL</b>        | Some concerns     | Undetected     | No concerns  | Major concerns | No concerns   | No concerns | -1* within-study bias, -2* imprecision                    | Very low          |
| <b>NT vs SM</b>               | Some concerns     | Undetected     | No concerns  | No concerns    | No concerns   | No concerns | -1* within-study bias                                     | Moderate          |
| <b>NT vs TAU</b>              | Some concerns     | Undetected     | No concerns  | Major concerns | No concerns   | No concerns | -1* within-study bias, -2* imprecision                    | Very low          |
| <b>NT vs WL</b>               | Some concerns     | Undetected     | No concerns  | Some concerns  | Some concerns | No concerns | -1* within-study bias, -1* imprecision, -1*               | Very low          |

| Comparison       | Within-study bias | Reporting bias | Indirectness | Imprecision    | Heterogeneity | Incoherence | Downgrading                                               | Confidence rating |
|------------------|-------------------|----------------|--------------|----------------|---------------|-------------|-----------------------------------------------------------|-------------------|
|                  |                   |                |              |                |               |             | heterogeneity                                             |                   |
| <b>SM vs ST</b>  | Some concerns     | Undetected     | No concerns  | No concerns    | No concerns   | No concerns | -1* within-study bias                                     | Moderate          |
| <b>SM vs TAU</b> | Some concerns     | Undetected     | No concerns  | No concerns    | No concerns   | No concerns | -1* within-study bias                                     | Moderate          |
| <b>SM vs WL</b>  | Some concerns     | Undetected     | No concerns  | No concerns    | No concerns   | No concerns | -1* within-study bias                                     | Moderate          |
| <b>ST vs TAU</b> | Some concerns     | Undetected     | No concerns  | Major concerns | No concerns   | No concerns | -1* within-study bias, -2* imprecision                    | Very low          |
| <b>ST vs WL</b>  | Some concerns     | Undetected     | No concerns  | Major concerns | No concerns   | No concerns | -1* within-study bias, -2* imprecision                    | Very low          |
| <b>TAU vs WL</b> | Some concerns     | Undetected     | No concerns  | Some concerns  | Some concerns | No concerns | -1* within-study bias, -1* imprecision, -1* heterogeneity | Very low          |

BT= Behavioral therapy. CPT= Cognitive processing therapy. CT= Cognitive therapy. DYN= Psychodynamic therapy. EMDR= Eye movement desensitization and reprocessing. G-TF-CBT= Group trauma-focused cognitive behavioral therapy. G-nTF-CBT= Group non-trauma-focused cognitive behavioral therapy. I/G-TF-CBT= Individual/group trauma-focused cognitive behavioral therapy. I/G-nTF-CBT= Individual/group non-trauma-focused cognitive behavioral therapy. I-TF-CBT= Individual trauma-focused cognitive behavioral therapy. I-nTF-CBT= Individual non-trauma-focused cognitive behavioral therapy. NT= No treatment. SM= Stress management. ST= Supportive therapy. TAU= Treatment as usual. WL= Waitlist.

## c. The confidence in SMD for all-cause discontinuation for all comparisons by CINeMA approach

| Number of studies            | Within-study bias | Reporting bias | Indirectness | Imprecision    | Heterogeneity | Incoherence | Downgrading                            | Confidence rating |
|------------------------------|-------------------|----------------|--------------|----------------|---------------|-------------|----------------------------------------|-------------------|
| <b>BT vs DYN</b>             | Some concerns     | Undetected     | No concerns  | Major concerns | No concerns   | No concerns | -1* within-study bias, -2* imprecision | Very low          |
| <b>BT vs SM</b>              | Some concerns     | Undetected     | No concerns  | Major concerns | No concerns   | No concerns | -1* within-study bias, -2* imprecision | Very low          |
| <b>BT vs ST</b>              | Some concerns     | Undetected     | No concerns  | Major concerns | No concerns   | No concerns | -1* within-study bias, -2* imprecision | Very low          |
| <b>BT vs TAU</b>             | Some concerns     | Undetected     | No concerns  | Major concerns | No concerns   | No concerns | -1* within-study bias, -2* imprecision | Very low          |
| <b>BT vs WL</b>              | Some concerns     | Undetected     | No concerns  | Major concerns | No concerns   | No concerns | -1* within-study bias, -2* imprecision | Very low          |
| <b>CPT vs WL</b>             | Major concerns    | Undetected     | No concerns  | Major concerns | No concerns   | No concerns | -2* within-study bias, -2* imprecision | Very low          |
| <b>CT vs I-TF-CBT</b>        | Some concerns     | Undetected     | No concerns  | Major concerns | No concerns   | No concerns | -1* within-study bias, -2* imprecision | Very low          |
| <b>CT vs WL</b>              | Some concerns     | Undetected     | No concerns  | Major concerns | No concerns   | No concerns | -1* within-study bias, -2* imprecision | Very low          |
| <b>EMDR vs I-TF-CBT</b>      | Some concerns     | Undetected     | No concerns  | Major concerns | No concerns   | No concerns | -1* within-study bias, -2* imprecision | Very low          |
| <b>EMDR vs NT</b>            | Major concerns    | Undetected     | No concerns  | No concerns    | No concerns   | No concerns | -2* within-study bias                  | Low               |
| <b>EMDR vs TAU</b>           | Some concerns     | Undetected     | No concerns  | Major concerns | No concerns   | No concerns | -1* within-study bias, -2* imprecision | Very low          |
| <b>EMDR vs WL</b>            | Some concerns     | Undetected     | No concerns  | Major concerns | No concerns   | No concerns | -1* within-study bias, -2* imprecision | Very low          |
| <b>FT vs WL</b>              | Some concerns     | Undetected     | No concerns  | No concerns    | No concerns   | No concerns | -1* within-study bias                  | Moderate          |
| <b>G-nTF-CBT vs G-TF-CBT</b> | Some concerns     | Undetected     | No concerns  | Major concerns | No concerns   | No concerns | -1* within-study bias, -2* imprecision | Very low          |
| <b>G-TF-CBT vs I-TF-CBT</b>  | Some concerns     | Undetected     | No concerns  | Major concerns | No concerns   | No concerns | -1* within-study bias, -2* imprecision | Very low          |
| <b>G-TF-CBT vs NT</b>        | Some concerns     | Undetected     | No concerns  | No concerns    | No concerns   | No concerns | -1* within-study bias                  | Moderate          |
| <b>G-TF-CBT vs TAU</b>       | Some concerns     | Undetected     | No concerns  | Major concerns | No concerns   | No concerns | -1* within-study bias, -2*             | Very low          |

| Number of studies            | Within-study bias | Reporting bias | Indirectness | Imprecision    | Heterogeneity | Incoherence   | Downgrading                                             | Confidence rating |
|------------------------------|-------------------|----------------|--------------|----------------|---------------|---------------|---------------------------------------------------------|-------------------|
|                              |                   |                |              |                |               |               | imprecision                                             |                   |
| <b>G-TF-CBT vs WL</b>        | Some concerns     | Undetected     | No concerns  | Major concerns | No concerns   | No concerns   | -1* within-study bias, -2* imprecision                  | Very low          |
| <b>G-nTF-CBT vs WL</b>       | Some concerns     | Undetected     | No concerns  | Major concerns | No concerns   | No concerns   | -1* within-study bias, -2* imprecision                  | Very low          |
| <b>I-nTF-CBT vs I-TF-CBT</b> | Major concerns    | Undetected     | No concerns  | Major concerns | No concerns   | No concerns   | -2* within-study bias, -2* imprecision                  | Very low          |
| <b>I-TF-CBT vs NT</b>        | Major concerns    | Undetected     | No concerns  | No concerns    | No concerns   | No concerns   | -2* within-study bias                                   | Low               |
| <b>I-TF-CBT vs P-TF-CBT</b>  | Major concerns    | Undetected     | No concerns  | Major concerns | No concerns   | No concerns   | -2* within-study bias, -2* imprecision                  | Very low          |
| <b>I-TF-CBT vs ST</b>        | Some concerns     | Undetected     | No concerns  | Major concerns | No concerns   | No concerns   | -1* within-study bias, -2* imprecision                  | Very low          |
| <b>I-TF-CBT vs TAU</b>       | Some concerns     | Undetected     | No concerns  | Major concerns | No concerns   | No concerns   | -1* within-study bias, -2* imprecision                  | Very low          |
| <b>I-TF-CBT vs WL</b>        | Some concerns     | Undetected     | No concerns  | Major concerns | No concerns   | No concerns   | -1* within-study bias, -2* imprecision                  | Very low          |
| <b>I-nTF-CBT vs NT</b>       | Some concerns     | Undetected     | No concerns  | No concerns    | No concerns   | No concerns   | -1* within-study bias                                   | Moderate          |
| <b>I-nTF-CBT vs ST</b>       | Some concerns     | Undetected     | No concerns  | Major concerns | No concerns   | No concerns   | -1* within-study bias, -2* imprecision                  | Very low          |
| <b>I-nTF-CBT vs TAU</b>      | Some concerns     | Undetected     | No concerns  | Major concerns | No concerns   | No concerns   | -1* within-study bias, -2* imprecision                  | Very low          |
| <b>NT vs ST</b>              | Some concerns     | Undetected     | No concerns  | No concerns    | No concerns   | No concerns   | -1* within-study bias                                   | Moderate          |
| <b>P-TF-CBT vs TAU</b>       | Major concerns    | Undetected     | No concerns  | Major concerns | No concerns   | No concerns   | -2* within-study bias, -2* imprecision                  | Very low          |
| <b>ST vs WL</b>              | Some concerns     | Undetected     | No concerns  | Major concerns | No concerns   | Some concerns | -1* within-study bias, -1* imprecision, -1* incoherence | Very low          |
| <b>BT vs CPT</b>             | Some concerns     | Undetected     | No concerns  | Major concerns | No concerns   | No concerns   | -1* within-study bias, -2* imprecision                  | Very low          |
| <b>BT vs CT</b>              | Some concerns     | Undetected     | No concerns  | Major concerns | No concerns   | No concerns   | -1* within-study bias, -2* imprecision                  | Very low          |
| <b>BT vs EMDR</b>            | Some concerns     | Undetected     | No concerns  | Major concerns | No concerns   | No concerns   | -1* within-study bias, -2* imprecision                  | Very low          |



| Number of studies       | Within-study bias | Reporting bias | Indirectness | Imprecision    | Heterogeneity  | Incoherence | Downgrading                              | Confidence rating |
|-------------------------|-------------------|----------------|--------------|----------------|----------------|-------------|------------------------------------------|-------------------|
| <b>BT vs FT</b>         | Some concerns     | Undetected     | No concerns  | No concerns    | Major concerns | No concerns | -1* within-study bias, -2* heterogeneity | Very low          |
| <b>BT vs G-TF-CBT</b>   | Some concerns     | Undetected     | No concerns  | Major concerns | No concerns    | No concerns | -1* within-study bias, -2* imprecision   | Very low          |
| <b>BT vs G-nTF-CBT</b>  | Some concerns     | Undetected     | No concerns  | Major concerns | No concerns    | No concerns | -1* within-study bias, -2* imprecision   | Very low          |
| <b>BT vs I-TF-CBT</b>   | Some concerns     | Undetected     | No concerns  | Major concerns | No concerns    | No concerns | -1* within-study bias, -2* imprecision   | Very low          |
| <b>BT vs I-nTF-CBT</b>  | Some concerns     | Undetected     | No concerns  | Major concerns | No concerns    | No concerns | -1* within-study bias, -2* imprecision   | Very low          |
| <b>BT vs NT</b>         | Some concerns     | Undetected     | No concerns  | No concerns    | No concerns    | No concerns | -1* within-study bias                    | Moderate          |
| <b>BT vs P-TF-CBT</b>   | Some concerns     | Undetected     | No concerns  | Major concerns | No concerns    | No concerns | -1* within-study bias, -2* imprecision   | Very low          |
| <b>CPT vs CT</b>        | Some concerns     | Undetected     | No concerns  | Major concerns | No concerns    | No concerns | -1* within-study bias, -2* imprecision   | Very low          |
| <b>CPT vs DYN</b>       | Some concerns     | Undetected     | No concerns  | Major concerns | No concerns    | No concerns | -1* within-study bias, -2* imprecision   | Very low          |
| <b>CPT vs EMDR</b>      | Some concerns     | Undetected     | No concerns  | Major concerns | No concerns    | No concerns | -1* within-study bias, -2* imprecision   | Very low          |
| <b>CPT vs FT</b>        | Major concerns    | Undetected     | No concerns  | Major concerns | No concerns    | No concerns | -2* within-study bias, -2* imprecision   | Very low          |
| <b>CPT vs G-TF-CBT</b>  | Some concerns     | Undetected     | No concerns  | Major concerns | No concerns    | No concerns | -1* within-study bias, -2* imprecision   | Very low          |
| <b>CPT vs G-nTF-CBT</b> | Some concerns     | Undetected     | No concerns  | Major concerns | No concerns    | No concerns | -1* within-study bias, -2* imprecision   | Very low          |
| <b>CPT vs I-TF-CBT</b>  | Some concerns     | Undetected     | No concerns  | Major concerns | No concerns    | No concerns | -1* within-study bias, -2* imprecision   | Very low          |
| <b>CPT vs I-nTF-CBT</b> | Major concerns    | Undetected     | No concerns  | Major concerns | No concerns    | No concerns | -2* within-study bias, -2* imprecision   | Very low          |
| <b>CPT vs NT</b>        | Major concerns    | Undetected     | No concerns  | Major concerns | No concerns    | No concerns | -2* within-study bias, -2* imprecision   | Very low          |
| <b>CPT vs P-TF-CBT</b>  | Major concerns    | Undetected     | No concerns  | Major concerns | No concerns    | No concerns | -2* within-study bias, -2* imprecision   | Very low          |

| Number of studies      | Within-study bias | Reporting bias | Indirectness | Imprecision    | Heterogeneity | Incoherence | Downgrading                                               | Confidence rating |
|------------------------|-------------------|----------------|--------------|----------------|---------------|-------------|-----------------------------------------------------------|-------------------|
| <b>CPT vs SM</b>       | Some concerns     | Undetected     | No concerns  | Major concerns | No concerns   | No concerns | -1* within-study bias, -2* imprecision                    | Very low          |
| <b>CPT vs ST</b>       | Some concerns     | Undetected     | No concerns  | Major concerns | No concerns   | No concerns | -1* within-study bias, -2* imprecision                    | Very low          |
| <b>CPT vs TAU</b>      | Some concerns     | Undetected     | No concerns  | Major concerns | No concerns   | No concerns | -1* within-study bias, -2* imprecision                    | Very low          |
| <b>CT vs DYN</b>       | Some concerns     | Undetected     | No concerns  | Major concerns | No concerns   | No concerns | -1* within-study bias, -2* imprecision                    | Very low          |
| <b>CT vs EMDR</b>      | Some concerns     | Undetected     | No concerns  | Major concerns | No concerns   | No concerns | -1* within-study bias, -2* imprecision                    | Very low          |
| <b>CT vs FT</b>        | Some concerns     | Undetected     | No concerns  | No concerns    | No concerns   | No concerns | -1* within-study bias                                     | Moderate          |
| <b>CT vs G-TF-CBT</b>  | Some concerns     | Undetected     | No concerns  | Major concerns | No concerns   | No concerns | -1* within-study bias, -2* imprecision                    | Very low          |
| <b>CT vs G-nTF-CBT</b> | Some concerns     | Undetected     | No concerns  | Major concerns | No concerns   | No concerns | -1* within-study bias, -2* imprecision                    | Very low          |
| <b>CT vs I-nTF-CBT</b> | Some concerns     | Undetected     | No concerns  | Major concerns | No concerns   | No concerns | -1* within-study bias, -2* imprecision                    | Very low          |
| <b>CT vs NT</b>        | Some concerns     | Undetected     | No concerns  | Some concerns  | Some concerns | No concerns | -1* within-study bias, -1* imprecision, -1* heterogeneity | Very low          |
| <b>CT vs P-TF-CBT</b>  | Some concerns     | Undetected     | No concerns  | Major concerns | No concerns   | No concerns | -1* within-study bias, -2* imprecision                    | Very low          |
| <b>CT vs SM</b>        | Some concerns     | Undetected     | No concerns  | Major concerns | No concerns   | No concerns | -1* within-study bias, -2* imprecision                    | Very low          |
| <b>CT vs ST</b>        | Some concerns     | Undetected     | No concerns  | Major concerns | No concerns   | No concerns | -1* within-study bias, -2* imprecision                    | Very low          |
| <b>CT vs TAU</b>       | Some concerns     | Undetected     | No concerns  | Major concerns | No concerns   | No concerns | -1* within-study bias, -2* imprecision                    | Very low          |
| <b>DYN vs EMDR</b>     | Some concerns     | Undetected     | No concerns  | Major concerns | No concerns   | No concerns | -1* within-study bias, -2* imprecision                    | Very low          |
| <b>DYN vs FT</b>       | Some concerns     | Undetected     | No concerns  | Major concerns | No concerns   | No concerns | -1* within-study bias, -2* imprecision                    | Very low          |

| Number of studies        | Within-study bias | Reporting bias | Indirectness | Imprecision    | Heterogeneity | Incoherence | Downgrading                                               | Confidence rating |
|--------------------------|-------------------|----------------|--------------|----------------|---------------|-------------|-----------------------------------------------------------|-------------------|
| <b>DYN vs G-TF-CBT</b>   | Some concerns     | Undetected     | No concerns  | Major concerns | No concerns   | No concerns | -1* within-study bias, -2* imprecision                    | Very low          |
| <b>DYN vs G-nTF-CBT</b>  | Some concerns     | Undetected     | No concerns  | Major concerns | No concerns   | No concerns | -1* within-study bias, -2* imprecision                    | Very low          |
| <b>DYN vs I-TF-CBT</b>   | Some concerns     | Undetected     | No concerns  | Major concerns | No concerns   | No concerns | -1* within-study bias, -2* imprecision                    | Very low          |
| <b>DYN vs I-nTF-CBT</b>  | Some concerns     | Undetected     | No concerns  | Major concerns | No concerns   | No concerns | -1* within-study bias, -2* imprecision                    | Very low          |
| <b>DYN vs NT</b>         | Some concerns     | Undetected     | No concerns  | Some concerns  | Some concerns | No concerns | -1* within-study bias, -1* imprecision, -1* heterogeneity | Very low          |
| <b>DYN vs P-TF-CBT</b>   | Some concerns     | Undetected     | No concerns  | Major concerns | No concerns   | No concerns | -1* within-study bias, -2* imprecision                    | Very low          |
| <b>DYN vs SM</b>         | Some concerns     | Undetected     | No concerns  | Major concerns | No concerns   | No concerns | -1* within-study bias, -2* imprecision                    | Very low          |
| <b>DYN vs ST</b>         | Some concerns     | Undetected     | No concerns  | Major concerns | No concerns   | No concerns | -1* within-study bias, -2* imprecision                    | Very low          |
| <b>DYN vs TAU</b>        | Some concerns     | Undetected     | No concerns  | Major concerns | No concerns   | No concerns | -1* within-study bias, -2* imprecision                    | Very low          |
| <b>DYN vs WL</b>         | Some concerns     | Undetected     | No concerns  | Major concerns | No concerns   | No concerns | -1* within-study bias, -2* imprecision                    | Very low          |
| <b>EMDR vs FT</b>        | Some concerns     | Undetected     | No concerns  | No concerns    | No concerns   | No concerns | -1* within-study bias                                     | Moderate          |
| <b>EMDR vs G-TF-CBT</b>  | Some concerns     | Undetected     | No concerns  | Major concerns | No concerns   | No concerns | -1* within-study bias, -2* imprecision                    | Very low          |
| <b>EMDR vs G-nTF-CBT</b> | Some concerns     | Undetected     | No concerns  | Major concerns | No concerns   | No concerns | -1* within-study bias, -2* imprecision                    | Very low          |
| <b>EMDR vs I-nTF-CBT</b> | Some concerns     | Undetected     | No concerns  | Major concerns | No concerns   | No concerns | -1* within-study bias, -2* imprecision                    | Very low          |
| <b>EMDR vs P-TF-CBT</b>  | Major concerns    | Undetected     | No concerns  | Major concerns | No concerns   | No concerns | -2* within-study bias, -2* imprecision                    | Very low          |
| <b>EMDR vs SM</b>        | Some concerns     | Undetected     | No concerns  | Major concerns | No concerns   | No concerns | -1* within-study bias, -2* imprecision                    | Very low          |

| Number of studies             | Within-study bias | Reporting bias | Indirectness | Imprecision    | Heterogeneity | Incoherence | Downgrading                                               | Confidence rating |
|-------------------------------|-------------------|----------------|--------------|----------------|---------------|-------------|-----------------------------------------------------------|-------------------|
| <b>EMDR vs ST</b>             | Some concerns     | Undetected     | No concerns  | Major concerns | No concerns   | No concerns | -1* within-study bias, -2* imprecision                    | Very low          |
| <b>FT vs G-TF-CBT</b>         | Some concerns     | Undetected     | No concerns  | No concerns    | No concerns   | No concerns | -1* within-study bias                                     | Moderate          |
| <b>FT vs G-nTF-CBT</b>        | Some concerns     | Undetected     | No concerns  | Some concerns  | Some concerns | No concerns | -1* within-study bias, -1* imprecision, -1* heterogeneity | Very low          |
| <b>FT vs I-TF-CBT</b>         | Some concerns     | Undetected     | No concerns  | No concerns    | No concerns   | No concerns | -1* within-study bias                                     | Moderate          |
| <b>FT vs I-nTF-CBT</b>        | Some concerns     | Undetected     | No concerns  | No concerns    | Some concerns | No concerns | -1* within-study bias, -1* heterogeneity                  | Low               |
| <b>FT vs NT</b>               | Some concerns     | Undetected     | No concerns  | No concerns    | No concerns   | No concerns | -1* within-study bias                                     | Moderate          |
| <b>FT vs P-TF-CBT</b>         | Some concerns     | Undetected     | No concerns  | Major concerns | No concerns   | No concerns | -1* within-study bias, -2* imprecision                    | Very low          |
| <b>FT vs SM</b>               | Some concerns     | Undetected     | No concerns  | Major concerns | No concerns   | No concerns | -1* within-study bias, -2* imprecision                    | Very low          |
| <b>FT vs ST</b>               | Some concerns     | Undetected     | No concerns  | No concerns    | No concerns   | No concerns | -1* within-study bias                                     | Moderate          |
| <b>FT vs TAU</b>              | Some concerns     | Undetected     | No concerns  | No concerns    | No concerns   | No concerns | -1* within-study bias                                     | Moderate          |
| <b>G-TF-CBT vs I-nTF-CBT</b>  | Some concerns     | Undetected     | No concerns  | Major concerns | No concerns   | No concerns | -1* within-study bias, -2* imprecision                    | Very low          |
| <b>G-TF-CBT vs P-TF-CBT</b>   | Some concerns     | Undetected     | No concerns  | Major concerns | No concerns   | No concerns | -1* within-study bias, -2* imprecision                    | Very low          |
| <b>G-TF-CBT vs SM</b>         | Some concerns     | Undetected     | No concerns  | Major concerns | No concerns   | No concerns | -1* within-study bias, -2* imprecision                    | Very low          |
| <b>G-TF-CBT vs ST</b>         | Some concerns     | Undetected     | No concerns  | Major concerns | No concerns   | No concerns | -1* within-study bias, -2* imprecision                    | Very low          |
| <b>G-nTF-CBT vs I-TF-CBT</b>  | Some concerns     | Undetected     | No concerns  | Major concerns | No concerns   | No concerns | -1* within-study bias, -2* imprecision                    | Very low          |
| <b>G-nTF-CBT vs I-nTF-CBT</b> | Some concerns     | Undetected     | No concerns  | Major concerns | No concerns   | No concerns | -1* within-study bias, -2* imprecision                    | Very low          |
| <b>G-nTF-CBT vs NT</b>        | Some concerns     | Undetected     | No concerns  | Some concerns  | Some concerns | No concerns | -1* within-study bias, -1* imprecision, -1* heterogeneity | Very low          |

| Number of studies            | Within-study bias | Reporting bias | Indirectness | Imprecision    | Heterogeneity | Incoherence | Downgrading                                               | Confidence rating |
|------------------------------|-------------------|----------------|--------------|----------------|---------------|-------------|-----------------------------------------------------------|-------------------|
| <b>G-nTF-CBT vs P-TF-CBT</b> | Some concerns     | Undetected     | No concerns  | Major concerns | No concerns   | No concerns | -1* within-study bias, -2* imprecision                    | Very low          |
| <b>G-nTF-CBT vs SM</b>       | Some concerns     | Undetected     | No concerns  | Major concerns | No concerns   | No concerns | -1* within-study bias, -2* imprecision                    | Very low          |
| <b>G-nTF-CBT vs ST</b>       | Some concerns     | Undetected     | No concerns  | Major concerns | No concerns   | No concerns | -1* within-study bias, -2* imprecision                    | Very low          |
| <b>G-nTF-CBT vs TAU</b>      | Some concerns     | Undetected     | No concerns  | Major concerns | No concerns   | No concerns | -1* within-study bias, -2* imprecision                    | Very low          |
| <b>I-TF-CBT vs SM</b>        | Some concerns     | Undetected     | No concerns  | Major concerns | No concerns   | No concerns | -1* within-study bias, -2* imprecision                    | Very low          |
| <b>I-nTF-CBT vs P-TF-CBT</b> | Major concerns    | Undetected     | No concerns  | Major concerns | No concerns   | No concerns | -2* within-study bias, -2* imprecision                    | Very low          |
| <b>I-nTF-CBT vs SM</b>       | Some concerns     | Undetected     | No concerns  | Major concerns | No concerns   | No concerns | -1* within-study bias, -2* imprecision                    | Very low          |
| <b>I-nTF-CBT vs WL</b>       | Some concerns     | Undetected     | No concerns  | Major concerns | No concerns   | No concerns | -1* within-study bias, -2* imprecision                    | Very low          |
| <b>NT vs P-TF-CBT</b>        | Major concerns    | Undetected     | No concerns  | No concerns    | Some concerns | No concerns | -2* within-study bias, -1* heterogeneity                  | Very low          |
| <b>NT vs SM</b>              | Some concerns     | Undetected     | No concerns  | Some concerns  | Some concerns | No concerns | -1* within-study bias, -1* imprecision, -1* heterogeneity | Very low          |
| <b>NT vs TAU</b>             | Some concerns     | Undetected     | No concerns  | No concerns    | No concerns   | No concerns | -1* within-study bias                                     | Moderate          |
| <b>NT vs WL</b>              | Some concerns     | Undetected     | No concerns  | No concerns    | No concerns   | No concerns | -1* within-study bias                                     | Moderate          |
| <b>P-TF-CBT vs SM</b>        | Some concerns     | Undetected     | No concerns  | Major concerns | No concerns   | No concerns | -1* within-study bias, -2* imprecision                    | Very low          |
| <b>P-TF-CBT vs ST</b>        | Some concerns     | Undetected     | No concerns  | Major concerns | No concerns   | No concerns | -1* within-study bias, -2* imprecision                    | Very low          |
| <b>P-TF-CBT vs WL</b>        | Some concerns     | Undetected     | No concerns  | Major concerns | No concerns   | No concerns | -1* within-study bias, -2* imprecision                    | Very low          |
| <b>SM vs ST</b>              | Some concerns     | Undetected     | No concerns  | Major concerns | No concerns   | No concerns | -1* within-study bias, -2* imprecision                    | Very low          |
| <b>SM vs TAU</b>             | Some concerns     | Undetected     | No concerns  | Major concerns | No concerns   | No concerns | -1* within-study bias, -2*                                | Very low          |

| Number of studies | Within-study bias | Reporting bias | Indirectness | Imprecision    | Heterogeneity | Incoherence | Downgrading                            | Confidence rating |
|-------------------|-------------------|----------------|--------------|----------------|---------------|-------------|----------------------------------------|-------------------|
|                   |                   |                |              |                |               |             | imprecision                            |                   |
| <b>SM vs WL</b>   | Some concerns     | Undetected     | No concerns  | Major concerns | No concerns   | No concerns | -1* within-study bias, -2* imprecision | Very low          |
| <b>ST vs TAU</b>  | Some concerns     | Undetected     | No concerns  | Major concerns | No concerns   | No concerns | -1* within-study bias, -2* imprecision | Very low          |
| <b>TAU vs WL</b>  | Some concerns     | Undetected     | No concerns  | Major concerns | No concerns   | No concerns | -1* within-study bias, -2* imprecision | Very low          |

BT= Behavioral therapy. CPT= Cognitive processing therapy. CT= Cognitive therapy. DYN= Psychodynamic therapy. EMDR= Eye movement desensitization and reprocessing. G-TF-CBT= Group trauma-focused cognitive behavioral therapy. G-nTF-CBT= Group non-trauma-focused cognitive behavioral therapy. I/G-TF-CBT= Individual/group trauma-focused cognitive behavioral therapy. I/G-nTF-CBT= Individual/group non-trauma-focused cognitive behavioral therapy. I-TF-CBT= Individual trauma-focused cognitive behavioral therapy. I-nTF-CBT= Individual non-trauma-focused cognitive behavioral therapy. NT= No treatment. SM= Stress management. ST= Supportive therapy. TAU= Treatment as usual. WL= Waitlist.

**d. The confidence in SMD for depressive symptoms for all comparisons by CINeMA approach**

| Number of studies            | Within-study bias | Reporting bias | Indirectness | Imprecision    | Heterogeneity  | Incoherence    | Downgrading                                               | Confidence rating |
|------------------------------|-------------------|----------------|--------------|----------------|----------------|----------------|-----------------------------------------------------------|-------------------|
| <b>BT vs DYN</b>             | Some concerns     | Undetected     | No concerns  | Major concerns | No concerns    | No concerns    | -1* within-study bias, -2* imprecision                    | Very low          |
| <b>BT vs SM</b>              | Some concerns     | Undetected     | No concerns  | Major concerns | No concerns    | No concerns    | -1* within-study bias, -2* imprecision                    | Very low          |
| <b>BT vs ST</b>              | Some concerns     | Undetected     | No concerns  | No concerns    | Some concerns  | Major concerns | -1* within-study bias, -1* heterogeneity, -1* incoherence | Very low          |
| <b>BT vs TAU</b>             | Some concerns     | Undetected     | No concerns  | No concerns    | Some concerns  | Major concerns | -1* within-study bias, -1* heterogeneity, -1* incoherence | Very low          |
| <b>CPT vs WL</b>             | Some concerns     | Undetected     | No concerns  | No concerns    | No concerns    | No concerns    | -1* within-study bias                                     | Moderate          |
| <b>CT vs I-TF-CBT</b>        | Some concerns     | Undetected     | No concerns  | Major concerns | No concerns    | No concerns    | -1* within-study bias, -2* imprecision                    | Very low          |
| <b>CT vs WL</b>              | No concerns       | Undetected     | No concerns  | Some concerns  | Some concerns  | No concerns    | -1* imprecision, -1* heterogeneity                        | Low               |
| <b>EMDR vs I-TF-CBT</b>      | Some concerns     | Undetected     | No concerns  | Major concerns | No concerns    | Major concerns | -1* within-study bias, -1* imprecision, -1* incoherence   | Very low          |
| <b>EMDR vs TAU</b>           | Some concerns     | Undetected     | No concerns  | No concerns    | Major concerns | No concerns    | -1* within-study bias, -2* heterogeneity                  | Very low          |
| <b>EMDR vs WL</b>            | Some concerns     | Undetected     | No concerns  | No concerns    | Major concerns | No concerns    | -1* within-study bias, -2* heterogeneity                  | Very low          |
| <b>G-nTF-CBT vs G-TF-CBT</b> | Some concerns     | Undetected     | No concerns  | Major concerns | No concerns    | No concerns    | -1* within-study bias, -2* imprecision                    | Very low          |
| <b>G-TF-CBT vs I-TF-CBT</b>  | Some concerns     | Undetected     | No concerns  | Some concerns  | Some concerns  | No concerns    | -1* within-study bias, -1* imprecision, -1* heterogeneity | Very low          |
| <b>G-TF-CBT vs NT</b>        | Some concerns     | Undetected     | No concerns  | Major concerns | No concerns    | No concerns    | -1* within-study bias, -2* imprecision                    | Very low          |
| <b>G-TF-CBT vs TAU</b>       | Some concerns     | Undetected     | No concerns  | Some concerns  | Some concerns  | No concerns    | -1* within-study bias, -1* imprecision, -1* heterogeneity | Very low          |
| <b>G-TF-CBT vs WL</b>        | Some concerns     | Undetected     | No concerns  | No concerns    | Major concerns | No concerns    | -1* within-study bias, -2* heterogeneity                  | Very low          |
| <b>I-nTF-CBT vs I-TF-CBT</b> | Some concerns     | Undetected     | No concerns  | Some concerns  | Some concerns  | No concerns    | -1* within-study bias, -1* imprecision, -1* heterogeneity | Very low          |

| Number of studies           | Within-study bias | Reporting bias | Indirectness | Imprecision    | Heterogeneity | Incoherence | Downgrading                                               | Confidence rating |
|-----------------------------|-------------------|----------------|--------------|----------------|---------------|-------------|-----------------------------------------------------------|-------------------|
| <b>I-TF-CBT vs P-TF-CBT</b> | Major concerns    | Undetected     | No concerns  | Major concerns | No concerns   | No concerns | -2* within-study bias, -2* imprecision                    | Very low          |
| <b>I-TF-CBT vs ST</b>       | Some concerns     | Undetected     | No concerns  | No concerns    | Some concerns | No concerns | -1* within-study bias, -1* heterogeneity                  | Low               |
| <b>I-TF-CBT vs TAU</b>      | Some concerns     | Undetected     | No concerns  | No concerns    | Some concerns | No concerns | -1* within-study bias, -1* heterogeneity                  | Low               |
| <b>I-TF-CBT vs WL</b>       | Some concerns     | Undetected     | No concerns  | No concerns    | Some concerns | No concerns | -1* within-study bias, -1* heterogeneity                  | Low               |
| <b>I-nTF-CBT vs NT</b>      | Some concerns     | Undetected     | No concerns  | Major concerns | No concerns   | No concerns | -1* within-study bias, -2* imprecision                    | Very low          |
| <b>I-nTF-CBT vs ST</b>      | Some concerns     | Undetected     | No concerns  | Major concerns | No concerns   | No concerns | -1* within-study bias, -2* imprecision                    | Very low          |
| <b>I-nTF-CBT vs TAU</b>     | Some concerns     | Undetected     | No concerns  | Major concerns | No concerns   | No concerns | -1* within-study bias, -2* imprecision                    | Very low          |
| <b>NT vs ST</b>             | Some concerns     | Undetected     | No concerns  | Major concerns | No concerns   | No concerns | -1* within-study bias, -2* imprecision                    | Very low          |
| <b>P-TF-CBT vs TAU</b>      | Major concerns    | Undetected     | No concerns  | Major concerns | No concerns   | No concerns | -2* within-study bias, -2* imprecision                    | Very low          |
| <b>BT vs CPT</b>            | Some concerns     | Undetected     | No concerns  | Major concerns | No concerns   | No concerns | -1* within-study bias, -2* imprecision                    | Very low          |
| <b>BT vs CT</b>             | Some concerns     | Undetected     | No concerns  | Major concerns | No concerns   | No concerns | -1* within-study bias, -2* imprecision                    | Very low          |
| <b>BT vs EMDR</b>           | Some concerns     | Undetected     | No concerns  | Major concerns | No concerns   | No concerns | -1* within-study bias, -2* imprecision                    | Very low          |
| <b>BT vs G-TF-CBT</b>       | Some concerns     | Undetected     | No concerns  | Some concerns  | Some concerns | No concerns | -1* within-study bias, -1* imprecision, -1* heterogeneity | Very low          |
| <b>BT vs G-nTF-CBT</b>      | Some concerns     | Undetected     | No concerns  | Major concerns | No concerns   | No concerns | -1* within-study bias, -2* imprecision                    | Very low          |
| <b>BT vs I-TF-CBT</b>       | Some concerns     | Undetected     | No concerns  | Major concerns | No concerns   | No concerns | -1* within-study bias, -2* imprecision                    | Very low          |
| <b>BT vs I-nTF-CBT</b>      | Some concerns     | Undetected     | No concerns  | Some concerns  | Some concerns | No concerns | -1* within-study bias, -1* imprecision, -1* heterogeneity | Very low          |
| <b>BT vs NT</b>             | Some concerns     | Undetected     | No concerns  | Some concerns  | Some concerns | No concerns | -1* within-study bias, -1*                                | Very low          |



| Number of studies       | Within-study bias | Reporting bias | Indirectness | Imprecision    | Heterogeneity | Incoherence | Downgrading                                               | Confidence rating |
|-------------------------|-------------------|----------------|--------------|----------------|---------------|-------------|-----------------------------------------------------------|-------------------|
|                         |                   |                |              |                |               |             | imprecision, -1* heterogeneity                            |                   |
| <b>BT vs P-TF-CBT</b>   | Some concerns     | Undetected     | No concerns  | Major concerns | No concerns   | No concerns | -1* within-study bias, -2* imprecision                    | Very low          |
| <b>BT vs WL</b>         | Some concerns     | Undetected     | No concerns  | No concerns    | Some concerns | No concerns | -1* within-study bias, -1* heterogeneity                  | Low               |
| <b>CPT vs CT</b>        | Some concerns     | Undetected     | No concerns  | Major concerns | No concerns   | No concerns | -1* within-study bias, -2* imprecision                    | Very low          |
| <b>CPT vs DYN</b>       | Some concerns     | Undetected     | No concerns  | Major concerns | No concerns   | No concerns | -1* within-study bias, -2* imprecision                    | Very low          |
| <b>CPT vs EMDR</b>      | Some concerns     | Undetected     | No concerns  | Some concerns  | Some concerns | No concerns | -1* within-study bias, -1* imprecision, -1* heterogeneity | Very low          |
| <b>CPT vs G-TF-CBT</b>  | Some concerns     | Undetected     | No concerns  | No concerns    | Some concerns | No concerns | -1* within-study bias, -1* heterogeneity                  | Low               |
| <b>CPT vs G-nTF-CBT</b> | Some concerns     | Undetected     | No concerns  | Major concerns | No concerns   | No concerns | -1* within-study bias, -2* imprecision                    | Very low          |
| <b>CPT vs I-TF-CBT</b>  | Some concerns     | Undetected     | No concerns  | Some concerns  | Some concerns | No concerns | -1* within-study bias, -1* imprecision, -1* heterogeneity | Very low          |
| <b>CPT vs I-nTF-CBT</b> | Some concerns     | Undetected     | No concerns  | No concerns    | Some concerns | No concerns | -1* within-study bias, -1* heterogeneity                  | Low               |
| <b>CPT vs NT</b>        | Some concerns     | Undetected     | No concerns  | No concerns    | No concerns   | No concerns | -1* within-study bias                                     | Moderate          |
| <b>CPT vs P-TF-CBT</b>  | Some concerns     | Undetected     | No concerns  | Some concerns  | Some concerns | No concerns | -1* within-study bias, -1* imprecision, -1* heterogeneity | Very low          |
| <b>CPT vs SM</b>        | Some concerns     | Undetected     | No concerns  | Major concerns | No concerns   | No concerns | -1* within-study bias, -2* imprecision                    | Very low          |
| <b>CPT vs ST</b>        | Some concerns     | Undetected     | No concerns  | No concerns    | No concerns   | No concerns | -1* within-study bias                                     | Moderate          |
| <b>CPT vs TAU</b>       | Some concerns     | Undetected     | No concerns  | No concerns    | No concerns   | No concerns | -1* within-study bias                                     | Moderate          |
| <b>CT vs DYN</b>        | Some concerns     | Undetected     | No concerns  | Major concerns | No concerns   | No concerns | -1* within-study bias, -2* imprecision                    | Very low          |
| <b>CT vs EMDR</b>       | Some concerns     | Undetected     | No concerns  | Major concerns | No concerns   | No concerns | -1* within-study bias, -2* imprecision                    | Very low          |
| <b>CT vs G-TF-CBT</b>   | Some concerns     | Undetected     | No concerns  | Major concerns | No concerns   | No concerns | -1* within-study bias, -2* imprecision                    | Very low          |

| Number of studies       | Within-study bias | Reporting bias | Indirectness | Imprecision    | Heterogeneity | Incoherence | Downgrading                                               | Confidence rating |
|-------------------------|-------------------|----------------|--------------|----------------|---------------|-------------|-----------------------------------------------------------|-------------------|
| <b>CT vs G-nTF-CBT</b>  | Some concerns     | Undetected     | No concerns  | Major concerns | No concerns   | No concerns | -1* within-study bias, -2* imprecision                    | Very low          |
| <b>CT vs I-nTF-CBT</b>  | Some concerns     | Undetected     | No concerns  | Major concerns | No concerns   | No concerns | -1* within-study bias, -2* imprecision                    | Very low          |
| <b>CT vs NT</b>         | Some concerns     | Undetected     | No concerns  | Major concerns | No concerns   | No concerns | -1* within-study bias, -2* imprecision                    | Very low          |
| <b>CT vs P-TF-CBT</b>   | Some concerns     | Undetected     | No concerns  | Major concerns | No concerns   | No concerns | -1* within-study bias, -2* imprecision                    | Very low          |
| <b>CT vs SM</b>         | Some concerns     | Undetected     | No concerns  | Major concerns | No concerns   | No concerns | -1* within-study bias, -2* imprecision                    | Very low          |
| <b>CT vs ST</b>         | Some concerns     | Undetected     | No concerns  | Some concerns  | Some concerns | No concerns | -1* within-study bias, -1* imprecision, -1* heterogeneity | Very low          |
| <b>CT vs TAU</b>        | Some concerns     | Undetected     | No concerns  | Some concerns  | Some concerns | No concerns | -1* within-study bias, -1* imprecision, -1* heterogeneity | Very low          |
| <b>DYN vs EMDR</b>      | Some concerns     | Undetected     | No concerns  | Major concerns | No concerns   | No concerns | -1* within-study bias, -2* imprecision                    | Very low          |
| <b>DYN vs G-TF-CBT</b>  | Some concerns     | Undetected     | No concerns  | Major concerns | No concerns   | No concerns | -1* within-study bias, -2* imprecision                    | Very low          |
| <b>DYN vs G-nTF-CBT</b> | Some concerns     | Undetected     | No concerns  | Major concerns | No concerns   | No concerns | -1* within-study bias, -2* imprecision                    | Very low          |
| <b>DYN vs I-TF-CBT</b>  | Some concerns     | Undetected     | No concerns  | Major concerns | No concerns   | No concerns | -1* within-study bias, -2* imprecision                    | Very low          |
| <b>DYN vs I-nTF-CBT</b> | Some concerns     | Undetected     | No concerns  | Major concerns | No concerns   | No concerns | -1* within-study bias, -2* imprecision                    | Very low          |
| <b>DYN vs NT</b>        | Some concerns     | Undetected     | No concerns  | Major concerns | No concerns   | No concerns | -1* within-study bias, -2* imprecision                    | Very low          |
| <b>DYN vs P-TF-CBT</b>  | Some concerns     | Undetected     | No concerns  | Major concerns | No concerns   | No concerns | -1* within-study bias, -2* imprecision                    | Very low          |
| <b>DYN vs SM</b>        | Some concerns     | Undetected     | No concerns  | Major concerns | No concerns   | No concerns | -1* within-study bias, -2* imprecision                    | Very low          |
| <b>DYN vs ST</b>        | Some concerns     | Undetected     | No concerns  | Major concerns | No concerns   | No concerns | -1* within-study bias, -2* imprecision                    | Very low          |
| <b>DYN vs TAU</b>       | Some concerns     | Undetected     | No concerns  | Major concerns | No concerns   | No concerns | -1* within-study bias, -2*                                | Very low          |

| Number of studies             | Within-study bias | Reporting bias | Indirectness | Imprecision    | Heterogeneity | Incoherence | Downgrading                                               | Confidence rating |
|-------------------------------|-------------------|----------------|--------------|----------------|---------------|-------------|-----------------------------------------------------------|-------------------|
|                               |                   |                |              |                |               |             | imprecision                                               |                   |
| <b>DYN vs WL</b>              | Some concerns     | Undetected     | No concerns  | Major concerns | No concerns   | No concerns | -1* within-study bias, -2* imprecision                    | Very low          |
| <b>EMDR vs G-TF-CBT</b>       | Some concerns     | Undetected     | No concerns  | Major concerns | No concerns   | No concerns | -1* within-study bias, -2* imprecision                    | Very low          |
| <b>EMDR vs G-nTF-CBT</b>      | Some concerns     | Undetected     | No concerns  | Major concerns | No concerns   | No concerns | -1* within-study bias, -2* imprecision                    | Very low          |
| <b>EMDR vs I-nTF-CBT</b>      | Some concerns     | Undetected     | No concerns  | Major concerns | No concerns   | No concerns | -1* within-study bias, -2* imprecision                    | Very low          |
| <b>EMDR vs NT</b>             | Some concerns     | Undetected     | No concerns  | Major concerns | No concerns   | No concerns | -1* within-study bias, -2* imprecision                    | Very low          |
| <b>EMDR vs P-TF-CBT</b>       | Some concerns     | Undetected     | No concerns  | Major concerns | No concerns   | No concerns | -1* within-study bias, -2* imprecision                    | Very low          |
| <b>EMDR vs SM</b>             | Some concerns     | Undetected     | No concerns  | Major concerns | No concerns   | No concerns | -1* within-study bias, -2* imprecision                    | Very low          |
| <b>EMDR vs ST</b>             | Some concerns     | Undetected     | No concerns  | Some concerns  | Some concerns | No concerns | -1* within-study bias, -1* imprecision, -1* heterogeneity | Very low          |
| <b>G-TF-CBT vs I-nTF-CBT</b>  | Some concerns     | Undetected     | No concerns  | Major concerns | No concerns   | No concerns | -1* within-study bias, -2* imprecision                    | Very low          |
| <b>G-TF-CBT vs P-TF-CBT</b>   | Some concerns     | Undetected     | No concerns  | Major concerns | No concerns   | No concerns | -1* within-study bias, -2* imprecision                    | Very low          |
| <b>G-TF-CBT vs SM</b>         | Some concerns     | Undetected     | No concerns  | Major concerns | No concerns   | No concerns | -1* within-study bias, -2* imprecision                    | Very low          |
| <b>G-TF-CBT vs ST</b>         | Some concerns     | Undetected     | No concerns  | Major concerns | No concerns   | No concerns | -1* within-study bias, -2* imprecision                    | Very low          |
| <b>G-nTF-CBT vs I-TF-CBT</b>  | Some concerns     | Undetected     | No concerns  | Major concerns | No concerns   | No concerns | -1* within-study bias, -2* imprecision                    | Very low          |
| <b>G-nTF-CBT vs I-nTF-CBT</b> | Some concerns     | Undetected     | No concerns  | Major concerns | No concerns   | No concerns | -1* within-study bias, -2* imprecision                    | Very low          |
| <b>G-nTF-CBT vs NT</b>        | Some concerns     | Undetected     | No concerns  | Major concerns | No concerns   | No concerns | -1* within-study bias, -2* imprecision                    | Very low          |
| <b>G-nTF-CBT vs P-TF-CBT</b>  | Some concerns     | Undetected     | No concerns  | Major concerns | No concerns   | No concerns | -1* within-study bias, -2* imprecision                    | Very low          |

| Number of studies            | Within-study bias | Reporting bias | Indirectness | Imprecision    | Heterogeneity | Incoherence | Downgrading                                               | Confidence rating |
|------------------------------|-------------------|----------------|--------------|----------------|---------------|-------------|-----------------------------------------------------------|-------------------|
| <b>G-nTF-CBT vs SM</b>       | Some concerns     | Undetected     | No concerns  | Major concerns | No concerns   | No concerns | -1* within-study bias, -2* imprecision                    | Very low          |
| <b>G-nTF-CBT vs ST</b>       | Some concerns     | Undetected     | No concerns  | Some concerns  | Some concerns | No concerns | -1* within-study bias, -1* imprecision, -1* heterogeneity | Very low          |
| <b>G-nTF-CBT vs TAU</b>      | Some concerns     | Undetected     | No concerns  | Some concerns  | Some concerns | No concerns | -1* within-study bias, -1* imprecision, -1* heterogeneity | Very low          |
| <b>G-nTF-CBT vs WL</b>       | Some concerns     | Undetected     | No concerns  | Some concerns  | Some concerns | No concerns | -1* within-study bias, -1* imprecision, -1* heterogeneity | Very low          |
| <b>I-TF-CBT vs NT</b>        | Some concerns     | Undetected     | No concerns  | Some concerns  | Some concerns | No concerns | -1* within-study bias, -1* imprecision, -1* heterogeneity | Very low          |
| <b>I-TF-CBT vs SM</b>        | Some concerns     | Undetected     | No concerns  | Major concerns | No concerns   | No concerns | -1* within-study bias, -2* imprecision                    | Very low          |
| <b>I-nTF-CBT vs P-TF-CBT</b> | Major concerns    | Undetected     | No concerns  | Major concerns | No concerns   | No concerns | -2* within-study bias, -2* imprecision                    | Very low          |
| <b>I-nTF-CBT vs SM</b>       | Some concerns     | Undetected     | No concerns  | Major concerns | No concerns   | No concerns | -1* within-study bias, -2* imprecision                    | Very low          |
| <b>I-nTF-CBT vs WL</b>       | Some concerns     | Undetected     | No concerns  | Major concerns | No concerns   | No concerns | -1* within-study bias, -2* imprecision                    | Very low          |
| <b>NT vs P-TF-CBT</b>        | Some concerns     | Undetected     | No concerns  | Major concerns | No concerns   | No concerns | -1* within-study bias, -2* imprecision                    | Very low          |
| <b>NT vs SM</b>              | Some concerns     | Undetected     | No concerns  | Major concerns | No concerns   | No concerns | -1* within-study bias, -2* imprecision                    | Very low          |
| <b>NT vs TAU</b>             | Some concerns     | Undetected     | No concerns  | Major concerns | No concerns   | No concerns | -1* within-study bias, -2* imprecision                    | Very low          |
| <b>NT vs WL</b>              | Some concerns     | Undetected     | No concerns  | Major concerns | No concerns   | No concerns | -1* within-study bias, -2* imprecision                    | Very low          |
| <b>P-TF-CBT vs SM</b>        | Some concerns     | Undetected     | No concerns  | Major concerns | No concerns   | No concerns | -1* within-study bias, -2* imprecision                    | Very low          |
| <b>P-TF-CBT vs ST</b>        | Some concerns     | Undetected     | No concerns  | Major concerns | No concerns   | No concerns | -1* within-study bias, -2* imprecision                    | Very low          |
| <b>P-TF-CBT vs WL</b>        | Some concerns     | Undetected     | No concerns  | Major concerns | No concerns   | No concerns | -1* within-study bias, -2* imprecision                    | Very low          |
| <b>SM vs ST</b>              | Some concerns     | Undetected     | No concerns  | Major concerns | No concerns   | No concerns | -1* within-study bias, -2*                                | Very low          |

| Number of studies | Within-study bias | Reporting bias | Indirectness | Imprecision    | Heterogeneity | Incoherence | Downgrading                            | Confidence rating |
|-------------------|-------------------|----------------|--------------|----------------|---------------|-------------|----------------------------------------|-------------------|
|                   |                   |                |              |                |               |             | imprecision                            |                   |
| <b>SM vs TAU</b>  | Some concerns     | Undetected     | No concerns  | Major concerns | No concerns   | No concerns | -1* within-study bias, -2* imprecision | Very low          |
| <b>SM vs WL</b>   | Some concerns     | Undetected     | No concerns  | Major concerns | No concerns   | No concerns | -1* within-study bias, -2* imprecision | Very low          |
| <b>ST vs TAU</b>  | Some concerns     | Undetected     | No concerns  | Major concerns | No concerns   | No concerns | -1* within-study bias, -2* imprecision | Very low          |
| <b>ST vs WL</b>   | Some concerns     | Undetected     | No concerns  | Major concerns | No concerns   | No concerns | -1* within-study bias, -2* imprecision | Very low          |
| <b>TAU vs WL</b>  | Some concerns     | Undetected     | No concerns  | Major concerns | No concerns   | No concerns | -1* within-study bias, -2* imprecision | Very low          |

CT= Cognitive therapy. EMDR= Eye movement desensitization and reprocessing. G-TF-CBT= Group trauma-focused cognitive behavioral therapy. I/G-TF-CBT= Individual/group trauma-focused cognitive behavioral therapy. I/G-nTF-CBT= Individual/group non-trauma-focused cognitive behavioral therapy. I-TF-CBT= Individual trauma-focused cognitive behavioral therapy. I-nTF-CBT= Individual non-trauma-focused cognitive behavioral therapy. ST= Supportive therapy. TAU= Treatment as usual. WL= Waitlist.

## e. The confidence in SMD for anxiety symptoms for all comparisons by CINeMA approach

| Number of studies            | Within-study bias | Reporting bias | Indirectness | Imprecision    | Heterogeneity  | Incoherence    | Downgrading                                               | Confidence rating |
|------------------------------|-------------------|----------------|--------------|----------------|----------------|----------------|-----------------------------------------------------------|-------------------|
| <b>CT vs I-TF-CBT</b>        | Some concerns     | Undetected     | No concerns  | Major concerns | No concerns    | No concerns    | -1* within-study bias, -2* imprecision                    | Very low          |
| <b>CT vs WL</b>              | No concerns       | Undetected     | No concerns  | No concerns    | Some concerns  | No concerns    | -1* heterogeneity                                         | Moderate          |
| <b>EMDR vs I-TF-CBT</b>      | Some concerns     | Undetected     | No concerns  | Major concerns | No concerns    | Major concerns | -1* within-study bias, -1* imprecision, -1* incoherence   | Very low          |
| <b>EMDR vs TAU</b>           | Some concerns     | Undetected     | No concerns  | Some concerns  | Some concerns  | No concerns    | -1* within-study bias, -1* imprecision, -1* heterogeneity | Very low          |
| <b>EMDR vs WL</b>            | Some concerns     | Undetected     | No concerns  | No concerns    | Some concerns  | Major concerns | -1* within-study bias, -1* heterogeneity, -1* incoherence | Very low          |
| <b>FT vs WL</b>              | Some concerns     | Undetected     | No concerns  | Major concerns | No concerns    | Some concerns  | -1* within-study bias, -1* imprecision, -1* incoherence   | Very low          |
| <b>G-nTF-CBT vs G-TF-CBT</b> | Some concerns     | Undetected     | No concerns  | Major concerns | No concerns    | Some concerns  | -1* within-study bias, -1* imprecision, -1* incoherence   | Very low          |
| <b>G-TF-CBT vs WL</b>        | Some concerns     | Undetected     | No concerns  | Major concerns | No concerns    | Some concerns  | -1* within-study bias, -1* imprecision, -1* incoherence   | Very low          |
| <b>I-nTF-CBT vs I-TF-CBT</b> | Major concerns    | Undetected     | No concerns  | Some concerns  | Some concerns  | No concerns    | -2* within-study bias, -1* imprecision, -1* heterogeneity | Very low          |
| <b>I-TF-CBT vs P-TF-CBT</b>  | Major concerns    | Undetected     | No concerns  | Major concerns | No concerns    | No concerns    | -2* within-study bias, -2* imprecision                    | Very low          |
| <b>I-TF-CBT vs ST</b>        | Some concerns     | Undetected     | No concerns  | No concerns    | Major concerns | No concerns    | -1* within-study bias, -1* heterogeneity                  | Very low          |
| <b>I-TF-CBT vs TAU</b>       | Some concerns     | Undetected     | No concerns  | Some concerns  | Some concerns  | No concerns    | -1* within-study bias, -1* imprecision, -1* heterogeneity | Very low          |
| <b>I-TF-CBT vs WL</b>        | Some concerns     | Undetected     | No concerns  | No concerns    | Some concerns  | No concerns    | -1* within-study bias, -1* heterogeneity                  | Low               |
| <b>I-nTF-CBT vs ST</b>       | Some concerns     | Undetected     | No concerns  | Major concerns | No concerns    | No concerns    | -1* within-study bias, -2* imprecision                    | Very low          |
| <b>P-TF-CBT vs TAU</b>       | Major concerns    | Undetected     | No concerns  | Major concerns | No concerns    | No concerns    | -2* within-study bias, -2* imprecision                    | Very low          |
| <b>ST vs WL</b>              | Some concerns     | Undetected     | No concerns  | Some concerns  | Some concerns  | No concerns    | -1* within-study bias, -1* imprecision, -1* heterogeneity | Very low          |

| Number of studies        | Within-study bias | Reporting bias | Indirectness | Imprecision    | Heterogeneity | Incoherence   | Downgrading                                               | Confidence rating |
|--------------------------|-------------------|----------------|--------------|----------------|---------------|---------------|-----------------------------------------------------------|-------------------|
| <b>CT vs EMDR</b>        | Some concerns     | Undetected     | No concerns  | Major concerns | No concerns   | Some concerns | -1* within-study bias, -1* imprecision, -1* incoherence   | Very low          |
| <b>CT vs FT</b>          | Some concerns     | Undetected     | No concerns  | Major concerns | No concerns   | Some concerns | -1* within-study bias, -1* imprecision, -1* incoherence   | Very low          |
| <b>CT vs G-TF-CBT</b>    | Some concerns     | Undetected     | No concerns  | Some concerns  | Some concerns | Some concerns | -1* within-study bias, -1* imprecision, -1* heterogeneity | Very low          |
| <b>CT vs G-nTF-CBT</b>   | Some concerns     | Undetected     | No concerns  | Major concerns | No concerns   | Some concerns | -1* within-study bias, -1* imprecision, -1* incoherence   | Very low          |
| <b>CT vs I-nTF-CBT</b>   | Some concerns     | Undetected     | No concerns  | Major concerns | No concerns   | Some concerns | -1* within-study bias, -1* imprecision, -1* incoherence   | Very low          |
| <b>CT vs P-TF-CBT</b>    | Some concerns     | Undetected     | No concerns  | Major concerns | No concerns   | Some concerns | -1* within-study bias, -1* imprecision, -1* incoherence   | Very low          |
| <b>CT vs ST</b>          | Some concerns     | Undetected     | No concerns  | Some concerns  | Some concerns | Some concerns | -1* within-study bias, -1* imprecision, -1* heterogeneity | Very low          |
| <b>CT vs TAU</b>         | Some concerns     | Undetected     | No concerns  | Major concerns | No concerns   | Some concerns | -1* within-study bias, -1* imprecision, -1* incoherence   | Very low          |
| <b>EMDR vs FT</b>        | Some concerns     | Undetected     | No concerns  | Major concerns | No concerns   | Some concerns | -1* within-study bias, -1* imprecision, -1* incoherence   | Very low          |
| <b>EMDR vs G-TF-CBT</b>  | Some concerns     | Undetected     | No concerns  | Some concerns  | Some concerns | Some concerns | -1* within-study bias, -1* imprecision, -1* heterogeneity | Very low          |
| <b>EMDR vs G-nTF-CBT</b> | Some concerns     | Undetected     | No concerns  | Major concerns | No concerns   | Some concerns | -1* within-study bias, -1* imprecision, -1* incoherence   | Very low          |
| <b>EMDR vs I-nTF-CBT</b> | Some concerns     | Undetected     | No concerns  | Major concerns | No concerns   | Some concerns | -1* within-study bias, -1* imprecision, -1* incoherence   | Very low          |
| <b>EMDR vs P-TF-CBT</b>  | Some concerns     | Undetected     | No concerns  | Major concerns | No concerns   | Some concerns | -1* within-study bias, -1* imprecision, -1* incoherence   | Very low          |
| <b>EMDR vs ST</b>        | Some concerns     | Undetected     | No concerns  | Some concerns  | Some concerns | Some concerns | -1* within-study bias, -1* imprecision, -1* heterogeneity | Very low          |
| <b>FT vs G-TF-CBT</b>    | Some concerns     | Undetected     | No concerns  | Major concerns | No concerns   | Some concerns | -1* within-study bias, -1* imprecision, -1* incoherence   | Very low          |
| <b>FT vs G-nTF-CBT</b>   | Some concerns     | Undetected     | No concerns  | Major concerns | No concerns   | Some concerns | -1* within-study bias, -1* imprecision, -1* incoherence   | Very low          |
| <b>FT vs I-TF-CBT</b>    | Some concerns     | Undetected     | No concerns  | Some concerns  | Some concerns | Some concerns | -1* within-study bias, -1*                                | Very low          |

| Number of studies             | Within-study bias | Reporting bias | Indirectness | Imprecision    | Heterogeneity  | Incoherence   | Downgrading                                               | Confidence rating |
|-------------------------------|-------------------|----------------|--------------|----------------|----------------|---------------|-----------------------------------------------------------|-------------------|
|                               |                   |                |              |                |                |               | imprecision, -1* heterogeneity                            |                   |
| <b>FT vs I-nTF-CBT</b>        | Some concerns     | Undetected     | No concerns  | Major concerns | No concerns    | Some concerns | -1* within-study bias, -1* imprecision, -1* incoherence   | Very low          |
| <b>FT vs P-TF-CBT</b>         | Some concerns     | Undetected     | No concerns  | Major concerns | No concerns    | Some concerns | -1* within-study bias, -1* imprecision, -1* incoherence   | Very low          |
| <b>FT vs ST</b>               | Some concerns     | Undetected     | No concerns  | Major concerns | No concerns    | Some concerns | -1* within-study bias, -1* imprecision, -1* incoherence   | Very low          |
| <b>FT vs TAU</b>              | Some concerns     | Undetected     | No concerns  | Major concerns | No concerns    | Some concerns | -1* within-study bias, -1* imprecision, -1* incoherence   | Very low          |
| <b>G-TF-CBT vs I-TF-CBT</b>   | Some concerns     | Undetected     | No concerns  | No concerns    | Major concerns | Some concerns | -1* within-study bias, -1* heterogeneity, -1* incoherence | Very low          |
| <b>G-TF-CBT vs I-nTF-CBT</b>  | Some concerns     | Undetected     | No concerns  | Major concerns | No concerns    | Some concerns | -1* within-study bias, -1* imprecision, -1* incoherence   | Very low          |
| <b>G-TF-CBT vs P-TF-CBT</b>   | Some concerns     | Undetected     | No concerns  | Major concerns | No concerns    | Some concerns | -1* within-study bias, -1* imprecision, -1* incoherence   | Very low          |
| <b>G-TF-CBT vs ST</b>         | Some concerns     | Undetected     | No concerns  | Major concerns | No concerns    | Some concerns | -1* within-study bias, -1* imprecision, -1* incoherence   | Very low          |
| <b>G-TF-CBT vs TAU</b>        | Some concerns     | Undetected     | No concerns  | Major concerns | No concerns    | Some concerns | -1* within-study bias, -1* imprecision, -1* incoherence   | Very low          |
| <b>G-nTF-CBT vs I-TF-CBT</b>  | Some concerns     | Undetected     | No concerns  | Major concerns | No concerns    | Some concerns | -1* within-study bias, -1* imprecision, -1* incoherence   | Very low          |
| <b>G-nTF-CBT vs I-nTF-CBT</b> | Some concerns     | Undetected     | No concerns  | Major concerns | No concerns    | Some concerns | -1* within-study bias, -1* imprecision, -1* incoherence   | Very low          |
| <b>G-nTF-CBT vs P-TF-CBT</b>  | Some concerns     | Undetected     | No concerns  | Major concerns | No concerns    | Some concerns | -1* within-study bias, -1* imprecision, -1* incoherence   | Very low          |
| <b>G-nTF-CBT vs ST</b>        | Some concerns     | Undetected     | No concerns  | Major concerns | No concerns    | Some concerns | -1* within-study bias, -1* imprecision, -1* incoherence   | Very low          |
| <b>G-nTF-CBT vs TAU</b>       | Some concerns     | Undetected     | No concerns  | Major concerns | No concerns    | Some concerns | -1* within-study bias, -1* imprecision, -1* incoherence   | Very low          |
| <b>G-nTF-CBT vs WL</b>        | Some concerns     | Undetected     | No concerns  | Major concerns | No concerns    | Some concerns | -1* within-study bias, -1* imprecision, -1* incoherence   | Very low          |
| <b>I-nTF-CBT vs P-TF-CBT</b>  | Major concerns    | Undetected     | No concerns  | Major concerns | No concerns    | Some concerns | -2* within-study bias, -1* imprecision, -1* incoherence   | Very low          |



| Number of studies       | Within-study bias | Reporting bias | Indirectness | Imprecision    | Heterogeneity | Incoherence   | Downgrading                                               | Confidence rating |
|-------------------------|-------------------|----------------|--------------|----------------|---------------|---------------|-----------------------------------------------------------|-------------------|
| <b>I-nTF-CBT vs TAU</b> | Some concerns     | Undetected     | No concerns  | Major concerns | No concerns   | Some concerns | -1* within-study bias, -1* imprecision, -1* incoherence   | Very low          |
| <b>I-nTF-CBT vs WL</b>  | Some concerns     | Undetected     | No concerns  | Major concerns | No concerns   | Some concerns | -1* within-study bias, -1* imprecision, -1* incoherence   | Very low          |
| <b>P-TF-CBT vs ST</b>   | Some concerns     | Undetected     | No concerns  | Major concerns | No concerns   | Some concerns | -1* within-study bias, -1* imprecision, -1* incoherence   | Very low          |
| <b>P-TF-CBT vs WL</b>   | Some concerns     | Undetected     | No concerns  | Major concerns | No concerns   | Some concerns | -1* within-study bias, -1* imprecision, -1* incoherence   | Very low          |
| <b>ST vs TAU</b>        | Some concerns     | Undetected     | No concerns  | Major concerns | No concerns   | Some concerns | -1* within-study bias, -1* imprecision, -1* incoherence   | Very low          |
| <b>TAU vs WL</b>        | Some concerns     | Undetected     | No concerns  | Some concerns  | Some concerns | Some concerns | -1* within-study bias, -1* imprecision, -1* heterogeneity | Very low          |

BT= Behavioral therapy. CPT= Cognitive processing therapy. CT= Cognitive therapy. DYN= Psychodynamic therapy. EMDR= Eye movement desensitization and reprocessing. G-TF-CBT= Group trauma-focused cognitive behavioral therapy. I/G-TF-CBT= Individual/group trauma-focused cognitive behavioral therapy. I/G-nTF-CBT= Individual/group non-trauma-focused cognitive behavioral therapy. I-TF-CBT= Individual trauma-focused cognitive behavioral therapy. I-nTF-CBT= Individual non-trauma-focused cognitive behavioral therapy. NT= No treatment. ST= Supportive therapy. TAU= Treatment as usual. WL= Waitlist.
